# Supplementary material for: Gene expression changes as markers of early lapatinib response in a panel of breast cancer cell lines
Source: Mol Cancer. 2012 Jun 18;11:41. doi: 10.1186/1476-4598-11-41 (PMC3439312; doi:10.1186/1476-4598-11-41)
Supplement: Additional File 3 — A full list of the differentially regulated genes and the TFs that are predicted to target them. This file also contains the fold change and the adjusted p-value for each of the six comparisons. [file 1476-4598-11-41-S3.xls]

## Sheet: Differentially expressed genes
					BT474: 6hr and 12hr1uM vs rest less 2hr 1uM			BT474 6hr and 12hr 1uM vs 6hr and 12hr DMSO and 0.1uM			SKBR3: 6hr and 12hr, 0.1uM and 1.0uM vs rest with 24hr 0.1uM less 2hr 0.1uM and 1uM			SKBR3: 6hr and 12hr, 0.1uM and 1.0uM vs rest without 24hr 0.1uM less 2hr 0.1uM and 1uM			SKBR3: 12 hr 0.1uM and 1uM vs rest with 24hr 0.1uM			SKBR3: 12 hr 0.1uM and 1uM vs rest without 24hr 0.1uM
U133 plus2 Probe ID	Gene Name	TF Targets	Description	Log2 Fold Change	Fold Change	P-value	Log2 Fold Change	Fold Change	P-value	Log2 Fold Change	Fold Change	P-value	Log2 Fold Change	Fold Change	P-value	Log2 Fold Change	Fold Change	P-value	Log2 Fold Change	Fold Change	P-value
200644_at	MARCKSL1	AhR/Arnt, OLF-1, RAR_RXR	MARCKS-related protein (MARCKS-like protein 1)(Macrophage myristoylated alanine-rich C kinase substrate)(Mac-MARCKS)(MacMARCKS) [Source:UniProtKB/Swiss-Prot;Acc:P49006]	-0.412074	-1.3306	0.00178768	-0.436405	-1.35323	4.93425e-07	-0.572312	-1.4869	5.51062e-06	-0.479633	-1.39439	4.07858e-06	-0.582462	-1.4974	8.82173e-05	-0.519756	-1.43371	5.18629e-06
200678_x_at	GRN		Granulins Precursor (Proepithelin)(PEPI) [Contains Acrogranin;Paragranulin;Granulin-1(Granulin G);Granulin-2(Granulin F);Granulin-3(Granulin B);Granulin-4(Granulin A);Granulin-5(Granulin C);Granulin-6(Granulin D);Granulin-7(Granulin E)] [Source:UniProtKB/Swiss-Prot;Acc:P28799]	0.739727	1.66986	0.000215623	0.782881	1.72056	4.42129e-06	0.428958	1.34626	0.0287789	0.628875	1.54636	3.91667e-07	0.536824	1.45078	0.0122135	0.638279	1.55647	1.45818e-05
200730_s_at	PTP4A1	PAX9, RAR_RXR	Protein tyrosine phosphatase type IVA 1 (EC 3.1.3.48)(Protein-tyrosine phosphatase 4a1)(Protein-tyrosine phosphatase of regenerating liver 1)(PRL-1)(PTP(CAAXI)) [Source:UniProtKB/Swiss-Prot;Acc:Q93096]	-1.05608	-2.07928	0.000841143	-0.870929	-1.82884	3.4534e-05	-1.21777	-2.32586	1.39897e-08	-1.35123	-2.55129	3.69631e-10	-0.987315	-1.98249	0.00256664	-1.03492	-2.04901	0.00166594
200733_s_at	PTP4A1	PAX9, RAR_RXR	Protein tyrosine phosphatase type IVA 1 (EC 3.1.3.48)(Protein-tyrosine phosphatase 4a1)(Protein-tyrosine phosphatase of regenerating liver 1)(PRL-1)(PTP(CAAXI)) [Source:UniProtKB/Swiss-Prot;Acc:Q93096]	-1.13258	-2.1925	6.86609e-06	-0.905218	-1.87283	4.90362e-06	-0.578091	-1.49287	0.000160109	-0.667909	-1.58877	5.19574e-06	-0.51414	-1.42814	0.0146549	-0.578228	-1.49301	0.00459918
200787_s_at	PEA15		Astrocytic phosphoprotein PEA-15 (Phosphoprotein enriched in diabetes)(PED) [Source:UniProtKB/Swiss-Prot;Acc:Q15121]	-0.492737	-1.40711	0.00551072	-0.494371	-1.40871	0.00987451	-0.408423	-1.32723	0.0088751	-0.445065	-1.36138	0.00594714	-0.653522	-1.573	2.17155e-05	-0.674665	-1.59623	1.9009e-05
200788_s_at	PEA15		Astrocytic phosphoprotein PEA-15 (Phosphoprotein enriched in diabetes)(PED) [Source:UniProtKB/Swiss-Prot;Acc:Q15121]	-0.41767	-1.33577	0.00520448	-0.446849	-1.36306	0.00283466	-0.434974	-1.35189	1.01107e-06	-0.414659	-1.33298	6.16236e-06	-0.527612	-1.44154	6.05482e-08	-0.514728	-1.42872	6.83531e-08
200790_at	ODC1		Ornithine decarboxylase (ODC)(EC 4.1.1.17) [Source:UniProtKB/Swiss-Prot;Acc:P11926]	-2.13025	-4.37793	0.000178451	-1.88446	-3.69214	0.0153652	-0.569612	-1.48412	0.0422316	-0.885027	-1.8468	8.56439e-08	-0.906334	-1.87428	0.00239862	-1.09488	-2.13595	9.27832e-09
200875_s_at	NOP56	STAF	Nucleolar protein 56 (Nucleolar protein 5A) [Source:UniProtKB/Swiss-Prot;Acc:O00567]	-0.959169	-1.94419	1.67567e-10	-0.887914	-1.8505	1.25818e-05	-0.777874	-1.7146	4.23613e-07	-0.906568	-1.87458	1.83956e-10	-0.559859	-1.47413	0.00907682	-0.628816	-1.5463	0.00244617
200894_s_at	FKBP4	STAF	FK506-binding protein 4 (EC 5.2.1.8)(Peptidyl-prolyl cis-trans isomerase)(PPIase)(Rotamase)(HSP-binding immunophilin)(HBI)(FKBP52 protein)(52 kDa FK506-binding protein)(FKBP59)(p59 protein) [Source:UniProtKB/Swiss-Prot;Acc:Q02790]	-1.02903	-2.04065	6.05327e-07	-1.01807	-2.0252	0.000929118	-0.750054	-1.68186	2.50906e-05	-0.809474	-1.75257	1.23833e-05	-0.712733	-1.63891	0.000878308	-0.732905	-1.66198	0.000851243
200899_s_at	MGEA5		Bifunctional protein NCOAT (Nuclear cytoplasmic O-GlcNAcase and acetyltransferase)(Meningioma-expressed antigen 5) [Includes Beta-hexosaminidase(EC 3.2.1.52)(N-acetyl-beta-glucosaminidase)(Beta-N-acetylhexosaminidase)(Hexosaminidase C)(N-acetyl-beta-D-glucosaminidase)(O-GlcNAcase);Histone acetyltransferase(HAT)(EC 2.3.1.48)] [Source:UniProtKB/Swiss-Prot;Acc:O60502]	0.65056	1.56978	0.00122268	0.842915	1.79367	0.000247613	0.569084	1.48358	1.28881e-05	0.631307	1.54897	1.35024e-06	0.510901	1.42494	0.00147888	0.527091	1.44102	0.00115624
200920_s_at	BTG1		Protein BTG1 (B-cell translocation gene 1 protein) [Source:UniProtKB/Swiss-Prot;Acc:P62324]	1.88352	3.68973	4.89353e-11	1.86363	3.63921	2.14758e-06	1.20901	2.3118	4.06067e-11	1.35166	2.55205	1.50407e-20	0.945671	1.92608	0.000297511	0.989714	1.98579	0.000163124
200921_s_at	BTG1		Protein BTG1 (B-cell translocation gene 1 protein) [Source:UniProtKB/Swiss-Prot;Acc:P62324]	1.35051	2.55003	3.58341e-06	1.30906	2.47779	0.00185603	1.02069	2.02889	7.0191e-08	1.19176	2.28431	6.19467e-14	0.875302	1.83439	0.000567977	0.956195	1.94019	7.78797e-05
200987_x_at	PSME3	PAX3	Proteasome activator complex subunit 3 (Proteasome activator 28 subunit gamma)(PA28gamma)(PA28g)(Activator of multicatalytic protease subunit 3)(11S regulator complex subunit gamma)(REG-gamma)(Ki nuclear autoantigen) [Source:UniProtKB/Swiss-Prot;Acc:P61289]	-0.971802	-1.96129	2.80227e-09	-1.12235	-2.17702	1.16692e-06	-0.947697	-1.92879	9.97241e-06	-1.03681	-2.05169	4.22531e-06	-1.20602	-2.30701	2.13266e-08	-1.28643	-2.43924	1.74207e-08
200999_s_at	CKAP4		Cytoskeleton-associated protein 4 (63 kDa membrane protein)(p63) [Source:UniProtKB/Swiss-Prot;Acc:Q07065]	-0.539982	-1.45395	3.37143e-06	-0.546959	-1.461	0.000155422	-0.677517	-1.59938	3.99428e-05	-0.727435	-1.65569	2.36831e-05	-1.0403	-2.05666	1.99238e-11	-1.07386	-2.10506	5.10622e-12
201037_at	PFKP		6-phosphofructokinase type C (EC 2.7.1.11)(Phosphofructokinase 1)(Phosphohexokinase)(Phosphofructo-1-kinase isozyme C)(PFK-C)(6-phosphofructokinase, platelet type) [Source:UniProtKB/Swiss-Prot;Acc:Q01813]	-0.750373	-1.68223	0.00274339	-0.642009	-1.5605	0.0113866	-0.816196	-1.76076	0.00267969	-0.958973	-1.94393	0.000401021	-1.47353	-2.77701	2.29341e-09	-1.55481	-2.93796	4.80937e-11
201060_x_at	STOM		Erythrocyte band 7 integral membrane protein (Stomatin)(Protein 7.2b) [Source:UniProtKB/Swiss-Prot;Acc:P27105]	0.93759	1.91533	1.06216e-06	0.884305	1.84588	0.000128904	0.581897	1.49682	0.000107427	0.673269	1.59468	1.95819e-06	0.829344	1.77688	5.59281e-08	0.87643	1.83583	9.74571e-10
201061_s_at	STOM		Erythrocyte band 7 integral membrane protein (Stomatin)(Protein 7.2b) [Source:UniProtKB/Swiss-Prot;Acc:P27105]	1.34883	2.54705	9.02452e-08	1.3315	2.51664	5.4384e-05	0.704275	1.62933	1.35834e-05	0.803411	1.74522	2.93214e-07	0.991834	1.98871	1.12949e-09	1.04148	2.05834	1.73604e-11
201127_s_at	ACLY		ATP-citrate synthase (EC 2.3.3.8)(ATP-citrate (pro-S-)-lyase)(Citrate cleavage enzyme) [Source:UniProtKB/Swiss-Prot;Acc:P53396]	-0.415978	-1.3342	0.000355644	-0.433375	-1.35039	0.00253429	-0.58789	-1.50305	5.73314e-07	-0.621754	-1.53875	4.78424e-07	-0.605592	-1.5216	2.09212e-05	-0.610218	-1.52649	3.53866e-05
201128_s_at	ACLY		ATP-citrate synthase (EC 2.3.3.8)(ATP-citrate (pro-S-)-lyase)(Citrate cleavage enzyme) [Source:UniProtKB/Swiss-Prot;Acc:P53396]	-0.631551	-1.54923	1.26765e-07	-0.635472	-1.55345	2.62127e-05	-0.426847	-1.34429	9.88778e-09	-0.444141	-1.3605	6.72519e-09	-0.454979	-1.37076	2.57153e-07	-0.448223	-1.36436	3.9518e-07
201144_s_at	EIF2S1		Eukaryotic translation initiation factor 2 subunit 1 (Eukaryotic translation initiation factor 2 subunit alpha)(eIF-2-alpha)(EIF-2alpha)(EIF-2A) [Source:UniProtKB/Swiss-Prot;Acc:P05198]	-0.487723	-1.40223	2.13145e-08	-0.561324	-1.47562	6.76794e-07	-0.447104	-1.3633	1.85076e-05	-0.548538	-1.4626	1.63873e-10	-0.463876	-1.37924	0.000146432	-0.509104	-1.42317	4.12975e-06
201170_s_at	BHLHE40	OLF-1, PAX3	Class E basic helix-loop-helix protein 40 (bHLHe40)(Class B basic helix-loop-helix protein 2)(bHLHB2)(Differentially expressed in chondrocytes protein 1)(DEC1)(Enhancer-of-split and hairy-related protein 2)(SHARP-2)(Stimulated by retinoic acid gene 13 protein) [Source:UniProtKB/Swiss-Prot;Acc:O14503]	-1.7089	-3.26911	0.000451754	-1.78286	-3.44106	0.00758165	-2.77228	-6.83188	8.96218e-09	-3.01108	-8.0617	5.60637e-09	-1.68396	-3.21309	0.0234619	-1.69309	-3.23349	0.0300885
201192_s_at	PITPNA	AhR/Arnt, PAX9	Phosphatidylinositol transfer protein alpha isoform (PtdIns transfer protein alpha)(PtdInsTP)(PI-TP-alpha) [Source:UniProtKB/Swiss-Prot;Acc:Q00169]	-0.791608	-1.731	1.94339e-07	-0.966633	-1.95427	3.36097e-06	-0.675226	-1.59685	0.000480559	-0.719616	-1.64674	0.000435588	-1.24237	-2.36588	6.64802e-15	-1.27221	-2.41531	1.60399e-16
201196_s_at	AMD1	OLF-1, PAX3	S-adenosylmethionine decarboxylase proenzyme Precursor (AdoMetDC)(SAMDC)(EC 4.1.1.50) [Contains S-adenosylmethionine decarboxylase alpha chain;S-adenosylmethionine decarboxylase beta chain] [Source:UniProtKB/Swiss-Prot;Acc:P17707]	-1.65542	-3.15014	1.98836e-08	-1.37318	-2.59042	9.4215e-05	-1.23238	-2.34954	2.17816e-05	-1.5003	-2.82902	2.50613e-09	-1.24696	-2.37341	0.000267835	-1.37851	-2.6	1.26497e-05
201197_at	AMD1	OLF-1, PAX3	S-adenosylmethionine decarboxylase proenzyme Precursor (AdoMetDC)(SAMDC)(EC 4.1.1.50) [Contains S-adenosylmethionine decarboxylase alpha chain;S-adenosylmethionine decarboxylase beta chain] [Source:UniProtKB/Swiss-Prot;Acc:P17707]	-1.47364	-2.77722	6.31435e-09	-1.22765	-2.34184	3.93055e-05	-1.09699	-2.13908	5.26352e-06	-1.32015	-2.49692	3.58756e-10	-1.10601	-2.1525	0.000141677	-1.23224	-2.34931	3.77329e-06
201211_s_at	DDX3X	OLF-1	ATP-dependent RNA helicase DDX3X (EC 3.6.1.-)(DEAD box protein 3, X-chromosomal)(Helicase-like protein 2)(HLP2)(DEAD box, X isoform) [Source:UniProtKB/Swiss-Prot;Acc:O00571]	-0.92905	-1.90402	9.27115e-09	-0.965258	-1.95241	4.20578e-05	-0.720079	-1.64727	1.10193e-06	-0.765055	-1.69944	7.8152e-07	-0.681598	-1.60392	0.000813917	-0.698658	-1.62299	0.000833974
201276_at	RAB5B		Ras-related protein Rab-5B [Source:UniProtKB/Swiss-Prot;Acc:P61020]	0.535003	1.44894	0.00522064	0.606539	1.5226	0.0296134	0.400909	1.32034	0.00269909	0.492173	1.40656	1.87567e-05	0.528033	1.44196	0.000411456	0.591512	1.50683	5.42356e-06
201277_s_at	HNRNPAB		Heterogeneous nuclear ribonucleoprotein A/B (hnRNP A/B)(APOBEC1-binding protein 1)(ABBP-1) [Source:UniProtKB/Swiss-Prot;Acc:Q99729]	-0.935463	-1.9125	1.32992e-10	-0.890234	-1.85348	4.20924e-06	-0.699336	-1.62376	0.000275223	-0.860742	-1.81597	2.66761e-07	-1.04578	-2.06448	6.05075e-07	-1.14085	-2.2051	2.42759e-10
201285_at	MKRN1		Makorin-1 (RING finger protein 61) [Source:UniProtKB/Swiss-Prot;Acc:Q9UHC7]	1.06264	2.08875	3.45958e-11	1.12966	2.18806	1.27114e-06	0.58053	1.4954	7.75865e-07	0.667616	1.58845	1.76034e-09	0.568956	1.48345	8.39535e-05	0.598729	1.51438	1.88786e-05
201300_s_at	PRNP	OLF-1	Major prion protein Precursor (PrP)(PrP27-30)(PrP33-35C)(ASCR)(CD230 antigen) [Source:UniProtKB/Swiss-Prot;Acc:P04156]	-1.00744	-2.01035	0.000448913	-1.07879	-2.11227	0.0117118	-0.467886	-1.38308	0.00622583	-0.521745	-1.43569	0.00296882	-0.928762	-1.90364	5.63776e-09	-0.955534	-1.9393	5.96716e-10
201307_at	2010-09-11		Septin-11 [Source:UniProtKB/Swiss-Prot;Acc:Q9NVA2]	-0.80183	-1.74331	1.12407e-07	-0.756718	-1.68964	1.465e-05	-0.586839	-1.50195	0.000102981	-0.702301	-1.6271	9.44828e-07	-0.887638	-1.85014	2.06409e-08	-0.926969	-1.90128	1.32341e-10
201346_at	ADIPOR2	PAX3, STAF	Adiponectin receptor protein 2 (Progestin and adipoQ receptor family member II) [Source:UniProtKB/Swiss-Prot;Acc:Q86V24]	0.622954	1.54003	4.16634e-05	0.642589	1.56113	0.00739017	0.409501	1.32823	0.0279038	0.426162	1.34365	0.031759	0.602676	1.51853	0.00593836	0.626629	1.54395	0.00566725
201383_s_at	NBR1		Next to BRCA1 gene 1 protein (Neighbor of BRCA1 gene 1 protein)(Membrane component, chromosome 17, surface marker 2)(1A1-3B) [Source:UniProtKB/Swiss-Prot;Acc:Q14596]	1.05152	2.07272	5.5801e-06	1.24935	2.37734	0.000181506	0.618767	1.53556	0.00676002	0.797425	1.738	7.42744e-05	0.872114	1.83034	0.000133152	0.973345	1.96339	2.04022e-06
201384_s_at	NBR1		Next to BRCA1 gene 1 protein (Neighbor of BRCA1 gene 1 protein)(Membrane component, chromosome 17, surface marker 2)(1A1-3B) [Source:UniProtKB/Swiss-Prot;Acc:Q14596]	0.84295	1.79371	2.83644e-05	1.03439	2.04825	0.000299846	0.654618	1.5742	0.00255835	0.827452	1.77455	2.74742e-05	0.914689	1.88516	2.85261e-05	1.00642	2.00892	4.77526e-07
201420_s_at	WDR77	RAR_RXR	Methylosome protein 50 (MEP-50)(WD repeat-containing protein 77)(Androgen receptor cofactor p44)(p44/Mep50) [Source:UniProtKB/Swiss-Prot;Acc:Q9BQA1]	-0.581429	-1.49633	0.0149975	-0.912959	-1.8829	0.00555951	-0.651914	-1.57125	4.20033e-05	-0.707289	-1.63273	1.03234e-05	-0.666977	-1.58774	0.000226198	-0.694914	-1.61879	0.000151793
201427_s_at	Unknown		Unknown	1.8058	3.49623	5.78485e-07	1.69938	3.2476	0.000756779	0.562152	1.47647	0.0191398	0.78118	1.71854	2.30763e-05	1.07421	2.10557	1.5174e-06	1.197	2.29263	1.29756e-13
201435_s_at	EIF4E	PAX3, RAR_RXR	Eukaryotic translation initiation factor 4E (eIF-4E)(eIF4E)(mRNA cap-binding protein)(eIF-4F 25 kDa subunit) [Source:UniProtKB/Swiss-Prot;Acc:P06730]	-1.43188	-2.69797	1.48272e-11	-1.41572	-2.66793	1.29303e-08	-0.593412	-1.50881	1.008e-07	-0.646177	-1.56502	2.03014e-09	-0.592087	-1.50743	3.15232e-05	-0.639372	-1.55765	5.5826e-06
201436_at	EIF4E	PAX3, RAR_RXR	Eukaryotic translation initiation factor 4E (eIF-4E)(eIF4E)(mRNA cap-binding protein)(eIF-4F 25 kDa subunit) [Source:UniProtKB/Swiss-Prot;Acc:P06730]	-0.871622	-1.82972	0.000370791	-0.610991	-1.52731	0.0254169	-0.484203	-1.39881	0.00478343	-0.60824	-1.5244	4.27433e-05	-0.500521	-1.41472	0.0127042	-0.537181	-1.45113	0.00253207
201437_s_at	EIF4E	PAX3, RAR_RXR	Eukaryotic translation initiation factor 4E (eIF-4E)(eIF4E)(mRNA cap-binding protein)(eIF-4F 25 kDa subunit) [Source:UniProtKB/Swiss-Prot;Acc:P06730]	-1.2526	-2.38271	6.05852e-09	-1.2754	-2.42066	1.30109e-06	-0.488692	-1.40317	0.000115219	-0.582629	-1.49758	3.90572e-07	-0.515911	-1.4299	0.000632058	-0.559443	-1.4737	6.63543e-05
201479_at	DKC1		H/ACA ribonucleoprotein complex subunit 4 (EC 5.4.99.-)(Dyskerin)(Nucleolar protein family A member 4)(snoRNP protein DKC1)(Nopp140-associated protein of 57 kDa)(Nucleolar protein NAP57)(CBF5 homolog) [Source:UniProtKB/Swiss-Prot;Acc:O60832]	-0.495651	-1.40996	0.00408531	-0.537927	-1.45189	0.0483039	-0.529691	-1.44362	0.00015109	-0.662458	-1.58278	9.38375e-08	-0.726177	-1.65425	9.55028e-06	-0.790011	-1.72909	9.97526e-08
201489_at	PPIF		Peptidyl-prolyl cis-trans isomerase, mitochondrial Precursor (PPIase)(Rotamase)(EC 5.2.1.8)(Cyclophilin F) [Source:UniProtKB/Swiss-Prot;Acc:P30405]	-0.872313	-1.8306	2.37107e-08	-0.949771	-1.93157	3.91867e-06	-0.813225	-1.75713	8.09175e-05	-0.964256	-1.95106	6.0395e-07	-0.998292	-1.99763	5.71667e-06	-1.06535	-2.09268	3.61862e-07
201490_s_at	PPIF		Peptidyl-prolyl cis-trans isomerase, mitochondrial Precursor (PPIase)(Rotamase)(EC 5.2.1.8)(Cyclophilin F) [Source:UniProtKB/Swiss-Prot;Acc:P30405]	-1.37204	-2.58836	1.81804e-10	-1.35313	-2.55465	1.24676e-05	-0.811535	-1.75508	0.00128835	-0.967477	-1.95542	6.47734e-05	-1.08436	-2.12044	4.34095e-05	-1.18453	-2.2729	4.44118e-06
201516_at	SRM	OLF-1	Spermidine synthase (SPDSY)(EC 2.5.1.16)(Putrescine aminopropyltransferase) [Source:UniProtKB/Swiss-Prot;Acc:P19623]	-1.05589	-2.07901	0.000158196	-1.31497	-2.48798	5.46779e-05	-0.630791	-1.54841	0.00144391	-0.744989	-1.67596	0.000104581	-0.939441	-1.91779	2.86809e-06	-0.98947	-1.98546	3.62167e-07
201571_s_at	DCTD		Deoxycytidylate deaminase (EC 3.5.4.12)(dCMP deaminase) [Source:UniProtKB/Swiss-Prot;Acc:P32321]	-1.03612	-2.05071	6.57173e-05	-1.21239	-2.31721	0.00177345	-0.726631	-1.65477	0.0334913	-0.884641	-1.84631	0.00555427	-1.76693	-3.4033	4.85822e-10	-1.87952	-3.67953	4.34033e-14
201572_x_at	DCTD		Deoxycytidylate deaminase (EC 3.5.4.12)(dCMP deaminase) [Source:UniProtKB/Swiss-Prot;Acc:P32321]	-0.695514	-1.61946	2.52049e-06	-0.630149	-1.54772	0.00176502	-0.557775	-1.472	0.00988282	-0.699869	-1.62436	0.000547042	-1.18661	-2.27617	1.79986e-10	-1.27735	-2.42393	6.89562e-17
201609_x_at	ICMT		Protein-S-isoprenylcysteine O-methyltransferase (EC 2.1.1.100)(Isoprenylcysteine carboxylmethyltransferase)(Prenylcysteine carboxyl methyltransferase)(pcCMT)(Prenylated protein carboxyl methyltransferase)(PPMT) [Source:UniProtKB/Swiss-Prot;Acc:O60725]	-1.25059	-2.37938	6.25381e-08	-1.3357	-2.52397	2.2219e-05	-0.616417	-1.53306	0.000602282	-0.747486	-1.67886	8.27017e-06	-0.871312	-1.82933	9.69666e-07	-0.945017	-1.92521	9.56417e-09
201611_s_at	ICMT		Protein-S-isoprenylcysteine O-methyltransferase (EC 2.1.1.100)(Isoprenylcysteine carboxylmethyltransferase)(Prenylcysteine carboxyl methyltransferase)(pcCMT)(Prenylated protein carboxyl methyltransferase)(PPMT) [Source:UniProtKB/Swiss-Prot;Acc:O60725]	-0.671719	-1.59297	0.00680943	-0.618469	-1.53524	0.00563655	-0.40855	-1.32735	0.00269793	-0.489435	-1.40389	0.000241216	-0.585223	-1.50027	2.99925e-05	-0.62067	-1.53759	6.78668e-06
201695_s_at	NP		Purine nucleoside phosphorylase (PNP)(EC 2.4.2.1)(Inosine phosphorylase) [Source:UniProtKB/Swiss-Prot;Acc:P00491]	-1.58817	-3.00668	8.70919e-09	-1.65365	-3.14628	1.31615e-06	-1.20206	-2.30068	8.24346e-06	-1.39621	-2.6321	8.18266e-08	-0.764513	-1.6988	0.0424594	-0.834754	-1.78355	0.0267168
201702_s_at	PPP1R10	PAX3, RXR_RAR	Serine/threonine-protein phosphatase 1 regulatory subunit 10 (Phosphatase 1 nuclear targeting subunit)(MHC class I region proline-rich protein CAT53)(FB19 protein)(PP1-binding protein of 114 kDa)(p99) [Source:UniProtKB/Swiss-Prot;Acc:Q96QC0]	1.21462	2.3208	5.55293e-07	1.11194	2.16136	0.000197034	0.611201	1.52753	8.27728e-05	0.645903	1.56472	0.000127813	0.797864	1.73853	3.86689e-05	0.794147	1.73405	0.00012544
201703_s_at	PPP1R10	PAX3, RXR_RAR	Serine/threonine-protein phosphatase 1 regulatory subunit 10 (Phosphatase 1 nuclear targeting subunit)(MHC class I region proline-rich protein CAT53)(FB19 protein)(PP1-binding protein of 114 kDa)(p99) [Source:UniProtKB/Swiss-Prot;Acc:Q96QC0]	1.1264	2.18313	1.00068e-06	0.961745	1.94766	0.000482519	0.777788	1.7145	1.57139e-06	0.836629	1.78587	2.17257e-07	0.845384	1.79674	5.47483e-05	0.867946	1.82506	4.84743e-05
201714_at	TUBG1	OLF-1	Tubulin gamma-1 chain (Gamma-1-tubulin)(Gamma-tubulin complex component 1)(GCP-1) [Source:UniProtKB/Swiss-Prot;Acc:P23258]	-1.39657	-2.63275	2.79086e-09	-1.47456	-2.77899	1.27835e-07	-1.1278	-2.18525	1.84443e-05	-1.30747	-2.47508	3.068e-07	-1.06378	-2.0904	0.000713433	-1.14144	-2.20601	0.000274432
201735_s_at	CLCN3		H(+)/Cl(-) exchange transporter 3 (Chloride transporter ClC-3)(ClC-3)(Chloride channel protein 3) [Source:UniProtKB/Swiss-Prot;Acc:P51790]	0.42325	1.34094	0.000412571	0.514014	1.42802	0.000335488	0.493291	1.40765	0.00479877	0.615259	1.53183	0.000237462	0.831701	1.77978	1.41637e-06	0.907859	1.87626	2.75388e-08
201779_s_at	RNF13		RING finger protein 13 [Source:UniProtKB/Swiss-Prot;Acc:O43567]	0.966217	1.95371	7.79793e-10	1.03111	2.0436	3.42743e-07	0.502501	1.41667	0.000193593	0.568796	1.48329	3.06968e-05	0.62951	1.54704	1.31341e-05	0.65739	1.57723	5.35505e-06
201780_s_at	RNF13		RING finger protein 13 [Source:UniProtKB/Swiss-Prot;Acc:O43567]	0.592156	1.5075	0.00113573	0.672789	1.59415	0.00496877	0.639616	1.55791	1.55795e-06	0.704767	1.62988	1.65112e-07	0.745737	1.67683	2.93746e-07	0.777147	1.71374	1.40471e-07
201798_s_at	MYOF		Myoferlin (Fer-1-like protein 3) [Source:UniProtKB/Swiss-Prot;Acc:Q9NZM1]	0.532823	1.44676	0.00268187	0.521997	1.43594	0.00296736	0.478782	1.39357	0.000174964	0.598141	1.51376	1.12327e-07	0.562907	1.47724	9.55999e-05	0.625653	1.54291	1.89285e-06
201821_s_at	TIMM17A		Mitochondrial import inner membrane translocase subunit Tim17-A (Inner membrane preprotein translocase Tim17a) [Source:UniProtKB/Swiss-Prot;Acc:Q99595]	-0.694082	-1.61786	9.35964e-06	-0.639243	-1.55751	0.00130326	-0.434708	-1.35164	0.00139369	-0.526067	-1.44	5.02885e-05	-0.777308	-1.71393	6.38852e-10	-0.840151	-1.79024	3.23989e-13
201865_x_at	NR3C1	AhR/Arnt, PAX3	Glucocorticoid receptor (GR)(Nuclear receptor subfamily 3 group C member 1) [Source:UniProtKB/Swiss-Prot;Acc:P04150]	1.19564	2.29046	0.000221479	0.957673	1.94218	0.00100234	0.681096	1.60336	2.85719e-06	0.752163	1.68432	4.80327e-07	0.878802	1.83885	1.97125e-05	0.913103	1.88309	4.08701e-06
201872_s_at	ABCE1		ATP-binding cassette sub-family E member 1 (RNase L inhibitor)(Ribonuclease 4 inhibitor)(RNS4I)(2'-5'-oligoadenylate-binding protein)(HuHP68) [Source:UniProtKB/Swiss-Prot;Acc:P61221]	-1.16466	-2.24181	1.40402e-07	-1.09045	-2.1294	5.92036e-06	-0.508916	-1.42298	5.52322e-07	-0.585346	-1.5004	3.51351e-10	-0.510065	-1.42411	0.000116362	-0.550922	-1.46502	1.62374e-05
201873_s_at	ABCE1		ATP-binding cassette sub-family E member 1 (RNase L inhibitor)(Ribonuclease 4 inhibitor)(RNS4I)(2'-5'-oligoadenylate-binding protein)(HuHP68) [Source:UniProtKB/Swiss-Prot;Acc:P61221]	-1.34227	-2.5355	1.04179e-06	-1.28948	-2.44439	7.16874e-05	-0.551176	-1.46528	0.000161503	-0.667496	-1.58831	9.2744e-08	-0.649212	-1.56831	0.000188591	-0.706491	-1.63183	4.04335e-06
201874_at	MPZL1		Myelin protein zero-like protein 1 Precursor (Protein zero-related) [Source:UniProtKB/Swiss-Prot;Acc:O95297]	-0.58723	-1.50236	1.50248e-06	-0.601141	-1.51692	0.00060286	-0.526164	-1.4401	3.31774e-05	-0.477324	-1.39216	0.000127979	-0.657685	-1.57755	3.11808e-06	-0.62156	-1.53854	1.27315e-06
201925_s_at	CD55		Complement decay-accelerating factor Precursor (CD55 antigen) [Source:UniProtKB/Swiss-Prot;Acc:P08174]	1.81539	3.51955	0.00181607	2.4491	5.46077	7.68271e-05	1.07158	2.10173	0.00602363	1.28604	2.43858	0.000957266	1.22483	2.33728	0.00560416	1.32621	2.50744	0.003143
201926_s_at	CD55		Complement decay-accelerating factor Precursor (CD55 antigen) [Source:UniProtKB/Swiss-Prot;Acc:P08174]	1.35986	2.56661	0.0026267	1.60423	3.04033	0.000178504	0.654638	1.57422	0.00192266	0.802865	1.74456	5.13151e-05	0.680688	1.6029	0.00520488	0.751021	1.68298	0.00135689
202023_at	EFNA1	PAX3, PAX9, STAF	Ephrin-A1 Precursor (EPH-related receptor tyrosine kinase ligand 1)(LERK-1)(Immediate early response protein B61)(Tumor necrosis factor, alpha-induced protein 4) [Source:UniProtKB/Swiss-Prot;Acc:P20827]	0.980705	1.97343	3.81356e-09	1.08371	2.11948	1.24753e-06	0.616438	1.53309	6.29611e-07	0.697178	1.62133	2.67552e-09	0.6382	1.55639	2.50896e-05	0.658559	1.57851	8.82868e-06
202031_s_at	WIPI2		WD repeat domain phosphoinositide-interacting protein 2 (WIPI-2)(WIPI49-like protein 2) [Source:UniProtKB/Swiss-Prot;Acc:Q9Y4P8]	1.38009	2.60285	8.48068e-15	1.27097	2.41324	4.2756e-08	0.691799	1.6153	1.05665e-08	0.778939	1.71587	1.60423e-11	0.70304	1.62793	3.23705e-05	0.740704	1.67099	1.33527e-05
202033_s_at	RB1CC1	STAF	RB1-inducible coiled-coil protein 1 [Source:UniProtKB/Swiss-Prot;Acc:Q8TDY2]	0.637555	1.55569	0.00265504	0.738105	1.66798	0.00279828	0.566118	1.48053	0.000901575	0.676741	1.59852	2.42788e-05	0.636064	1.55408	0.000695102	0.701176	1.62583	0.000106429
202040_s_at	KDM5A		Lysine-specific demethylase 5A (EC 1.14.11.-)(Histone demethylase JARID1A)(Jumonji/ARID domain-containing protein 1A)(Retinoblastoma-binding protein 2)(RBBP-2) [Source:UniProtKB/Swiss-Prot;Acc:P29375]	1.26111	2.3968	2.73613e-06	1.0997	2.14311	0.00134248	0.718867	1.64589	1.30929e-05	0.809178	1.75221	1.7264e-06	0.597701	1.5133	0.00887565	0.623572	1.54068	0.00802465
202052_s_at	RAI14		Ankycorbin (Ankyrin repeat and coiled-coil structure-containing protein)(Retinoic acid-induced protein 14)(Novel retinal pigment epithelial cell protein) [Source:UniProtKB/Swiss-Prot;Acc:Q9P0K7]	-2.06042	-4.17107	5.38501e-14	-2.04167	-4.11723	1.27769e-08	-1.92773	-3.80457	2.20107e-08	-1.8128	-3.51323	4.28977e-07	-1.51766	-2.86325	0.00124954	-1.36818	-2.58144	0.00518945
202053_s_at	ALDH3A2		Fatty aldehyde dehydrogenase (EC 1.2.1.3)(Aldehyde dehydrogenase family 3 member A2)(Aldehyde dehydrogenase 10)(Microsomal aldehyde dehydrogenase) [Source:UniProtKB/Swiss-Prot;Acc:P51648]	0.596594	1.51214	6.32236e-06	0.52099	1.43494	0.00582205	0.468172	1.38336	5.59204e-07	0.481807	1.39649	6.02581e-07	0.507282	1.42137	1.83925e-06	0.504351	1.41848	6.13526e-06
202054_s_at	ALDH3A2		Fatty aldehyde dehydrogenase (EC 1.2.1.3)(Aldehyde dehydrogenase family 3 member A2)(Aldehyde dehydrogenase 10)(Microsomal aldehyde dehydrogenase) [Source:UniProtKB/Swiss-Prot;Acc:P51648]	0.768542	1.70355	2.6841e-09	0.827056	1.77406	7.79981e-07	0.623182	1.54027	2.22107e-07	0.678053	1.59998	2.70324e-08	0.795038	1.73512	2.09939e-09	0.834204	1.78287	7.69143e-10
202056_at	KPNA1		Importin subunit alpha-1 (Karyopherin subunit alpha-1)(SRP1-beta)(RAG cohort protein 2)(Nucleoprotein interactor 1)(NPI-1) [Source:UniProtKB/Swiss-Prot;Acc:P52294]	-0.602527	-1.51837	0.000778463	-0.517491	-1.43146	0.00831137	-0.480699	-1.39542	0.0302999	-0.523582	-1.43752	0.0154222	-0.497027	-1.4113	0.0434423	-0.485886	-1.40045	0.0399839
202069_s_at	IDH3A		Isocitrate dehydrogenase [NAD] subunit alpha, mitochondrial Precursor (EC 1.1.1.41)(Isocitric dehydrogenase)(NAD(+)-specific ICDH) [Source:UniProtKB/Swiss-Prot;Acc:P50213]	-0.948464	-1.92982	2.54217e-08	-1.02308	-2.03226	3.91867e-06	-0.65545	-1.57511	1.10336e-08	-0.724735	-1.6526	4.1158e-10	-0.764107	-1.69832	3.58401e-08	-0.79229	-1.73182	7.5947e-09
202070_s_at	IDH3A		Isocitrate dehydrogenase [NAD] subunit alpha, mitochondrial Precursor (EC 1.1.1.41)(Isocitric dehydrogenase)(NAD(+)-specific ICDH) [Source:UniProtKB/Swiss-Prot;Acc:P50213]	-0.619249	-1.53608	0.000301679	-0.658709	-1.57867	9.54793e-06	-0.669287	-1.59029	1.3378e-08	-0.740573	-1.67084	1.26398e-10	-0.720076	-1.64727	5.60057e-07	-0.742791	-1.67341	2.11768e-07
202071_at	SDC4	PAX3, RXR_RAR	Syndecan-4 Precursor (SYND4)(Amphiglycan)(Ryudocan core protein) [Source:UniProtKB/Swiss-Prot;Acc:P31431]	0.544253	1.45826	0.000121548	0.634787	1.55271	0.000865689	0.528079	1.44201	8.38645e-05	0.593761	1.50918	1.47104e-05	0.405736	1.32476	0.0188683	0.434027	1.351	0.0140702
202078_at	COPS3		COP9 signalosome complex subunit 3 (Signalosome subunit 3)(SGN3)(JAB1-containing signalosome subunit 3) [Source:UniProtKB/Swiss-Prot;Acc:Q9UNS2]	-0.609148	-1.52536	0.000151429	-0.672586	-1.59393	4.5998e-06	-0.566833	-1.48127	0.000155355	-0.709702	-1.63547	2.51415e-09	-0.704838	-1.62996	3.32417e-05	-0.782619	-1.72025	1.80788e-08
202085_at	TJP2	PAX3	Tight junction protein ZO-2 (Zonula occludens protein 2)(Zona occludens protein 2)(Tight junction protein 2) [Source:UniProtKB/Swiss-Prot;Acc:Q9UDY2]	0.494089	1.40843	6.49193e-05	0.526744	1.44067	0.00516845	0.48242	1.39709	0.000209584	0.578511	1.49331	2.22321e-06	0.702387	1.62719	1.90724e-07	0.764002	1.69819	4.0348e-10
202105_at	IGBP1		Immunoglobulin-binding protein 1 (CD79a-binding protein 1)(B-cell signal transduction molecule alpha 4)(Protein alpha-4)(Renal carcinoma antigen NY-REN-16) [Source:UniProtKB/Swiss-Prot;Acc:P78318]	0.938651	1.91674	1.18363e-07	1.0676	2.09595	3.00608e-06	0.586781	1.50189	0.000538536	0.737392	1.66716	1.07716e-06	0.901306	1.86776	6.05482e-08	0.971864	1.96137	1.66783e-11
202130_at	RIOK3		Serine/threonine-protein kinase RIO3 (RIO kinase 3)(EC 2.7.11.1)(sudD homolog) [Source:UniProtKB/Swiss-Prot;Acc:O14730]	0.416338	1.33454	0.000382978	0.545745	1.45977	0.000317435	0.509874	1.42393	0.000955498	0.577839	1.49261	0.000262703	0.512643	1.42666	0.00538383	0.531894	1.44583	0.00442325
202160_at	CREBBP		CREB-binding protein (EC 2.3.1.48) [Source:UniProtKB/Swiss-Prot;Acc:Q92793]	1.25281	2.38305	0.000286333	0.814977	1.75927	0.00109329	0.465087	1.3804	5.76495e-05	0.510513	1.42456	1.74832e-05	0.43478	1.3517	0.00493022	0.450678	1.36668	0.00462858
202181_at	KIAA0247		Uncharacterized protein KIAA0247 Precursor [Source:UniProtKB/Swiss-Prot;Acc:Q92537]	0.765327	1.69976	8.38564e-06	0.985362	1.97981	2.74233e-05	0.763087	1.69712	0.000150832	0.906123	1.874	1.79639e-06	0.902474	1.86927	4.10016e-05	0.972755	1.96259	4.04335e-06
202200_s_at	SRPK1		Serine/threonine-protein kinase SRPK1 (EC 2.7.11.1)(Serine/arginine-rich protein-specific kinase 1)(SR-protein-specific kinase 1)(SFRS protein kinase 1) [Source:UniProtKB/Swiss-Prot;Acc:Q96SB4]	-1.22695	-2.34071	8.69148e-10	-1.19289	-2.28611	8.58891e-06	-1.15437	-2.22587	2.75184e-09	-1.28785	-2.44163	1.77961e-11	-1.28282	-2.43314	9.10928e-08	-1.33159	-2.51679	3.37271e-08
202214_s_at	CUL4B		Cullin-4B (CUL-4B) [Source:UniProtKB/Swiss-Prot;Acc:Q13620]	0.634301	1.55219	0.000443773	0.73711	1.66683	0.00458473	0.670793	1.59195	0.00107048	0.786828	1.72528	3.98989e-05	1.16518	2.24262	6.81812e-11	1.23308	2.35069	6.75679e-15
202227_s_at	BRD8	STAF	Bromodomain-containing protein 8 (p120)(Skeletal muscle abundant protein 2)(Skeletal muscle abundant protein)(Thyroid hormone receptor coactivating protein 120kDa)(TrCP120) [Source:UniProtKB/Swiss-Prot;Acc:Q9H0E9]	2.00629	4.01747	3.1862e-10	1.65875	3.15743	6.87575e-06	0.957893	1.94247	1.008e-07	0.973168	1.96315	5.0438e-07	0.814083	1.75818	0.00386415	0.791332	1.73067	0.00794871
202264_s_at	TOMM40	RAR_RXR, STAF	Mitochondrial import receptor subunit TOM40 homolog (Translocase of outer membrane 40 kDa subunit homolog)(Protein Haymaker)(p38.5) [Source:UniProtKB/Swiss-Prot;Acc:O96008]	-0.473043	-1.38803	4.08859e-05	-0.524502	-1.43844	0.0012417	-0.459032	-1.37462	0.00346633	-0.535426	-1.44937	0.00028011	-0.60649	-1.52255	0.000229511	-0.654675	-1.57426	2.48558e-05
202316_x_at	UBE4B	AhR/Arnt, OLF-1, RAR_RXR	Ubiquitin conjugation factor E4 B (Ubiquitin fusion degradation protein 2)(Homozygously deleted in neuroblastoma 1) [Source:UniProtKB/Swiss-Prot;Acc:O95155]	1.17243	2.25391	0.000196768	1.17363	2.25579	0.000510498	0.598357	1.51399	0.00379976	0.639234	1.5575	0.00433958	1.01276	2.01776	1.40822e-06	1.09955	2.14289	8.05708e-07
202317_s_at	UBE4B		Ubiquitin conjugation factor E4 B (Ubiquitin fusion degradation protein 2)(Homozygously deleted in neuroblastoma 1) [Source:UniProtKB/Swiss-Prot;Acc:O95155]	0.676656	1.59843	1.26273e-06	0.678156	1.60009	9.21391e-05	0.545574	1.4596	0.000575878	0.639042	1.55729	6.80768e-05	0.889961	1.85313	1.08635e-07	0.9473	1.92826	5.52665e-09
202341_s_at	TRIM2		Tripartite motif-containing protein 2 (RING finger protein 86) [Source:UniProtKB/Swiss-Prot;Acc:Q9C040]	1.20075	2.2986	6.92013e-10	1.04756	2.06703	9.83148e-05	1.00963	2.0134	1.82322e-06	1.17066	2.25114	7.40229e-09	1.28904	2.44366	9.17404e-09	1.37149	2.58737	2.34219e-10
202342_s_at	TRIM2		Tripartite motif-containing protein 2 (RING finger protein 86) [Source:UniProtKB/Swiss-Prot;Acc:Q9C040]	1.87765	3.67477	6.91892e-08	1.78377	3.44325	0.000265074	0.904732	1.8722	1.79291e-05	1.06597	2.09358	2.04597e-07	1.27207	2.41508	1.37617e-09	1.34235	2.53564	8.82525e-12
202364_at	MXI1		MAX-interacting protein 1 (Protein MXI1) [Source:UniProtKB/Swiss-Prot;Acc:P50539]	2.4987	5.65175	4.82159e-09	2.82255	7.07413	2.77474e-05	0.817123	1.76189	0.0033405	1.05144	2.0726	6.60922e-06	1.01422	2.01982	0.000653537	1.11793	2.17036	9.92329e-06
202386_s_at	KIAA0430		Limkain-b1 [Source:UniProtKB/Swiss-Prot;Acc:Q9Y4F3]	1.25622	2.38869	2.37718e-06	1.19493	2.28934	0.000283856	0.895958	1.86084	3.70411e-06	1.05608	2.07927	9.50574e-09	0.611174	1.5275	0.0473863	0.694161	1.61794	0.0222756
202396_at	TCERG1	STAF	Transcription elongation regulator 1 (TATA box-binding protein-associated factor 2S)(Transcription factor CA150) [Source:UniProtKB/Swiss-Prot;Acc:O14776]	-0.693732	-1.61746	0.000561198	-0.77539	-1.71165	0.0017203	-0.439863	-1.35648	0.000675833	-0.566854	-1.48129	4.29798e-07	-0.667445	-1.58826	7.02284e-07	-0.736598	-1.66624	1.8881e-10
202414_at	ERCC5		DNA repair protein complementing XP-G cells (EC 3.1.-.-)(Xeroderma pigmentosum group G-complementing protein)(DNA excision repair protein ERCC-5) [Source:UniProtKB/Swiss-Prot;Acc:P28715]	0.873088	1.83158	4.12774e-06	0.823613	1.76983	0.00266778	0.704506	1.62959	1.89382e-05	0.821326	1.76703	2.64414e-07	0.945644	1.92605	1.26721e-06	1.00303	2.0042	1.82701e-08
202454_s_at	ERBB3	OLF-1	Receptor tyrosine-protein kinase erbB-3 Precursor (c-erbB3)(EC 2.7.10.1)(Tyrosine kinase-type cell surface receptor HER3) [Source:UniProtKB/Swiss-Prot;Acc:P21860]	1.68789	3.22186	3.96696e-12	1.67089	3.18412	1.63528e-06	0.518645	1.43261	0.0110267	0.723783	1.65151	2.60677e-06	0.839619	1.78958	1.41718e-05	0.971122	1.96036	6.89192e-12
202483_s_at	RANBP1		Ran-specific GTPase-activating protein (Ran-binding protein 1)(RanBP1) [Source:UniProtKB/Swiss-Prot;Acc:P43487]	-0.586828	-1.50194	0.000131722	-0.648495	-1.56753	0.000706775	-0.737423	-1.6672	0.000867355	-0.944199	-1.92412	3.90412e-07	-0.928907	-1.90383	6.73044e-05	-1.02982	-2.04177	3.24037e-07
202488_s_at	FXYD3		FXYD domain-containing ion transport regulator 3 Precursor (Chloride conductance inducer protein Mat-8)(Mammary tumor 8 kDa protein)(Phospholemman-like) [Source:UniProtKB/Swiss-Prot;Acc:Q14802]	1.61053	3.05364	8.80471e-08	1.502	2.83235	0.000139171	0.896207	1.86117	3.32963e-05	1.08731	2.12478	2.72054e-08	1.32651	2.50795	3.30886e-09	1.43086	2.69606	3.09887e-13
202528_at	GALE		UDP-glucose 4-epimerase (EC 5.1.3.2)(UDP-galactose 4-epimerase)(Galactowaldenase) [Source:UniProtKB/Swiss-Prot;Acc:Q14376]	-1.13124	-2.19047	3.72982e-05	-1.17434	-2.2569	0.00137321	-0.788981	-1.72785	0.00114907	-0.892473	-1.85636	0.000451932	-1.54517	-2.91838	2.40425e-11	-1.63104	-3.09736	1.47733e-13
202553_s_at	SYF2		Pre-mRNA-splicing factor SYF2 (CCNDBP1-interactor)(p29) [Source:UniProtKB/Swiss-Prot;Acc:O95926]	1.09757	2.13994	1.53105e-10	1.12856	2.1864	1.465e-05	0.854981	1.80873	4.83521e-10	0.9551	1.93871	3.1409e-14	0.844234	1.79531	1.26996e-06	0.883772	1.84519	4.22348e-07
202595_s_at	LEPROTL1		Leptin receptor overlapping transcript-like 1 [Source:UniProtKB/Swiss-Prot;Acc:O95214]	-0.771896	-1.70751	7.61157e-09	-0.826183	-1.77299	2.51789e-06	-0.543131	-1.45713	3.38429e-06	-0.611156	-1.52748	2.74635e-07	-0.492133	-1.40652	0.00121861	-0.507223	-1.42131	0.00112811
202597_at	IRF6		Interferon regulatory factor 6 (IRF-6) [Source:UniProtKB/Swiss-Prot;Acc:O14896]	1.46086	2.75272	1.02179e-15	1.42948	2.69349	1.29303e-08	0.650192	1.56938	2.73678e-08	0.706538	1.63188	7.73755e-09	0.812237	1.75593	1.77423e-08	0.849867	1.80234	2.9119e-09
202613_at	CTPS		CTP synthase 1 (EC 6.3.4.2)(UTP--ammonia ligase 1)(CTP synthetase 1) [Source:UniProtKB/Swiss-Prot;Acc:P17812]	-1.57103	-2.97118	2.74175e-06	-1.78123	-3.4372	0.000473057	-1.68643	-3.21859	0.000248091	-2.06703	-4.19022	1.40124e-06	-2.9018	-7.47359	4.68531e-11	-3.11762	-8.67956	4.92553e-17
202690_s_at	AC106037.2		Small nuclear ribonucleoprotein Sm D1 (Sm-D1)(snRNP core protein D1)(Sm-D autoantigen) [Source:UniProtKB/Swiss-Prot;Acc:P62314]	-0.931715	-1.90754	2.0203e-08	-0.939106	-1.91734	5.76004e-07	-0.462709	-1.37813	0.00434793	-0.612567	-1.52898	2.64509e-06	-0.581474	-1.49638	0.00096364	-0.664598	-1.58513	7.38286e-06
202691_at	AC106037.2		Small nuclear ribonucleoprotein Sm D1 (Sm-D1)(snRNP core protein D1)(Sm-D autoantigen) [Source:UniProtKB/Swiss-Prot;Acc:P62314]	-0.764466	-1.69874	1.01352e-05	-0.524881	-1.43881	0.00260201	-0.467384	-1.3826	0.00472961	-0.655965	-1.57567	2.35099e-07	-0.653871	-1.57338	0.000142157	-0.733389	-1.66254	9.30781e-08
202770_s_at	CCNG2		Cyclin-G2 [Source:UniProtKB/Swiss-Prot;Acc:Q16589]	0.948852	1.93034	0.00403727	0.881197	1.8419	0.0428546	1.5849	2.99987	1.52142e-10	1.8011	3.48485	5.85606e-17	1.25119	2.38038	0.000449211	1.31822	2.49358	0.000282524
202806_at	DBN1		Drebrin (Developmentally-regulated brain protein) [Source:UniProtKB/Swiss-Prot;Acc:Q16643]	-1.11276	-2.16258	2.48e-07	-1.07957	-2.11341	6.35063e-07	-0.671899	-1.59317	0.000164516	-0.610807	-1.52711	0.000391166	-0.987638	-1.98294	1.36694e-07	-0.892711	-1.85666	2.73066e-07
202808_at	C10orf26	RAR_RXR	Outcome predictor in acute leukemia 1 [Source:UniProtKB/Swiss-Prot;Acc:Q9NX94]	0.520916	1.43487	0.000245041	0.412531	1.33102	0.0089992	0.857149	1.81145	6.55311e-06	1.06213	2.08802	3.8408e-10	1.00922	2.01283	2.75701e-05	1.07601	2.1082	3.14632e-06
202854_at	HPRT1		Hypoxanthine-guanine phosphoribosyltransferase (HGPRTase)(HGPRT)(EC 2.4.2.8) [Source:UniProtKB/Swiss-Prot;Acc:P00492]	-1.51918	-2.86628	8.80761e-06	-1.61491	-3.06293	5.68769e-06	-0.552257	-1.46638	0.000270879	-0.66965	-1.59069	3.30351e-06	-0.834912	-1.78375	7.63339e-08	-0.887557	-1.85004	6.5322e-10
202864_s_at	SP100		Nuclear autoantigen Sp-100 (Nuclear dot-associated Sp100 protein)(Speckled 100 kDa)(Lysp100b) [Source:UniProtKB/Swiss-Prot;Acc:P23497]	1.32617	2.50735	3.01901e-09	1.35283	2.55414	7.35611e-06	1.08896	2.12721	5.73314e-07	1.24833	2.37566	7.9739e-10	1.11804	2.17052	9.217e-06	1.35833	2.56387	1.21629e-08
202911_at	MSH6		DNA mismatch repair protein Msh6 (MutS-alpha 160 kDa subunit)(G/T mismatch-binding protein)(GTMBP)(GTBP)(p160) [Source:UniProtKB/Swiss-Prot;Acc:P52701]	-0.635982	-1.554	9.09402e-05	-0.670821	-1.59198	0.00081964	-0.829583	-1.77717	0.00214693	-0.993312	-1.99075	0.000191345	-0.71675	-1.64348	0.0377003	-0.791051	-1.73034	0.0209449
202973_x_at	FAM13A		Protein FAM13A [Source:UniProtKB/Swiss-Prot;Acc:O94988]	0.952989	1.93588	9.50602e-08	0.847188	1.79899	9.54793e-06	0.760756	1.69438	7.42248e-09	0.789821	1.72886	4.62779e-09	0.707222	1.63266	5.47934e-05	0.723499	1.65118	5.74938e-05
202984_s_at	BAG5		BAG family molecular chaperone regulator 5 (BAG-5)(Bcl-2-associated athanogene 5) [Source:UniProtKB/Swiss-Prot;Acc:Q9UL15]	-0.781079	-1.71842	3.00707e-05	-0.728746	-1.6572	0.00526728	-0.607959	-1.5241	0.000633214	-0.655474	-1.57513	0.000716683	-0.521342	-1.43529	0.024058	-0.538434	-1.45239	0.0270093
203016_s_at	SSX2IP	PAX3	Afadin- and alpha-actinin-binding protein (ADIP)(Afadin DIL domain-interacting protein)(SSX2-interacting protein) [Source:UniProtKB/Swiss-Prot;Acc:Q9Y2D8]	-2.02611	-4.07305	1.90833e-08	-1.96317	-3.89918	2.19071e-05	-1.15447	-2.22603	2.8321e-05	-1.27211	-2.41515	5.30513e-06	-0.964658	-1.9516	0.00596576	-0.992496	-1.98962	0.00522716
203017_s_at	SSX2IP	PAX3	Afadin- and alpha-actinin-binding protein (ADIP)(Afadin DIL domain-interacting protein)(SSX2-interacting protein) [Source:UniProtKB/Swiss-Prot;Acc:Q9Y2D8]	-1.97261	-3.92477	1.04064e-07	-1.84473	-3.59187	1.39458e-05	-1.28278	-2.43307	0.000255646	-1.59647	-3.02402	3.69193e-07	-1.09012	-2.12892	0.0119602	-1.24022	-2.36234	0.00180414
203023_at	NOP16	STAF	Nucleolar protein 16 (HBV pre-S2 trans-regulated protein 3) [Source:UniProtKB/Swiss-Prot;Acc:Q9Y3C1]	-1.20717	-2.30885	2.21522e-07	-1.03535	-2.04961	0.000574516	-0.706214	-1.63152	2.2202e-05	-0.822717	-1.76873	4.5516e-07	-0.544168	-1.45818	0.0119232	-0.582976	-1.49794	0.00731464
203038_at	PTPRK		Receptor-type tyrosine-protein phosphatase kappa Precursor (Protein-tyrosine phosphatase kappa)(R-PTP-kappa)(EC 3.1.3.48) [Source:UniProtKB/Swiss-Prot;Acc:Q15262]	0.825861	1.77259	3.6852e-09	0.872013	1.83021	2.01862e-08	0.494461	1.40879	7.22213e-07	0.538297	1.45226	2.49258e-07	0.486105	1.40066	8.70085e-05	0.494037	1.40838	0.000100672
203040_s_at	HMBS		Porphobilinogen deaminase (PBG-D)(EC 2.5.1.61)(Pre-uroporphyrinogen synthase)(Hydroxymethylbilane synthase)(HMBS) [Source:UniProtKB/Swiss-Prot;Acc:P08397]	-1.10033	-2.14404	1.05152e-07	-1.15146	-2.22138	6.36097e-06	-0.71705	-1.64382	0.000229727	-0.884681	-1.84636	6.84064e-07	-1.13233	-2.19212	1.72647e-07	-1.25732	-2.39051	7.04516e-11
203044_at	CHSY1		Chondroitin sulfate synthase 1 (EC 2.4.1.175)(Glucuronosyl-N-acetylgalactosaminyl-proteoglycan 4-beta-N-acetylgalactosaminyltransferase 1)(N-acetylgalactosaminyl-proteoglycan 3-beta-glucuronosyltransferase 1)(EC 2.4.1.226)(Chondroitin glucuronyltransferase II)(N-acetylgalactosaminyltransferase II) [Source:UniProtKB/Swiss-Prot;Acc:Q86X52]	-0.966945	-1.9547	1.18363e-07	-1.05873	-2.0831	1.93448e-06	-1.03573	-2.05015	7.08689e-07	-1.13675	-2.19885	8.08046e-08	-0.787215	-1.72574	0.00534831	-0.840504	-1.79068	0.0040057
203064_s_at	FOXK2		Forkhead box protein K2 (Interleukin enhancer-binding factor 1)(Cellular transcription factor ILF-1)(FOXK1) [Source:UniProtKB/Swiss-Prot;Acc:Q01167]	-0.503084	-1.41724	0.000269649	-0.584489	-1.49951	0.000555378	-0.841994	-1.79253	4.62644e-10	-0.877697	-1.83744	3.98446e-11	-0.750884	-1.68282	6.74468e-05	-0.756615	-1.68952	7.16128e-05
203066_at	CHST15		N-acetylgalactosamine 4-sulfate 6-O-sulfotransferase (EC 2.8.2.33)(GalNAc4S-6ST)(B-cell RAG-associated gene protein)(hBRAG) [Source:UniProtKB/Swiss-Prot;Acc:Q7LFX5]	0.634677	1.55259	5.60862e-07	0.521732	1.43568	0.00123324	0.644646	1.56336	0.000119529	0.817106	1.76187	1.79871e-10	0.756955	1.68992	0.000125153	0.839367	1.78926	1.97477e-07
203109_at	UBE2MP1		NEDD8-conjugating enzyme Ubc12 (EC 6.3.2.-)(Ubiquitin-conjugating enzyme E2 M)(NEDD8 protein ligase)(NEDD8 carrier protein) [Source:UniProtKB/Swiss-Prot;Acc:P61081]	-0.761639	-1.69542	2.84022e-05	-0.817178	-1.76196	7.98832e-05	-0.691486	-1.61495	0.000862733	-0.77943	-1.71645	0.000140773	-1.05824	-2.08239	6.55829e-07	-1.10535	-2.15152	8.87397e-08
203119_at	CCDC86		Coiled-coil domain-containing protein 86 (Cytokine-induced protein with coiled-coil domain) [Source:UniProtKB/Swiss-Prot;Acc:Q9H6F5]	-1.33427	-2.52147	3.5509e-08	-1.44791	-2.72813	4.09817e-06	-1.15402	-2.22534	1.68695e-09	-1.29647	-2.45627	5.18926e-12	-0.916921	-1.88808	0.00152724	-0.946108	-1.92667	0.00131643
203147_s_at	TRIM14		Tripartite motif-containing protein 14 [Source:UniProtKB/Swiss-Prot;Acc:Q14142]	-0.595763	-1.51127	0.00109409	-0.87853	-1.8385	0.0017049	-0.640924	-1.55933	0.000106319	-0.645142	-1.56389	0.000226917	-0.966768	-1.95446	2.13266e-08	-0.971224	-1.9605	3.55837e-08
203155_at	SETDB1		Histone-lysine N-methyltransferase SETDB1 (EC 2.1.1.43)(SET domain bifurcated 1)(ERG-associated protein with SET domain)(ESET)(Histone H3-K9 methyltransferase 4)(H3-K9-HMTase 4)(Lysine N-methyltransferase 1E) [Source:UniProtKB/Swiss-Prot;Acc:Q15047]	0.538758	1.45272	0.0010621	0.507167	1.42126	0.00490208	0.426762	1.34421	0.000383956	0.479063	1.39384	3.93589e-05	0.464355	1.3797	0.0115482	0.507027	1.42112	0.0035302
203218_at	MAPK9		Mitogen-activated protein kinase 9 (EC 2.7.11.24)(Stress-activated protein kinase JNK2)(c-Jun N-terminal kinase 2)(JNK-55) [Source:UniProtKB/Swiss-Prot;Acc:P45984]	-0.526428	-1.44036	0.000219834	-0.682606	-1.60504	3.46754e-05	-0.73507	-1.66448	7.75435e-06	-0.840324	-1.79045	2.38002e-07	-1.01838	-2.02565	1.27503e-09	-1.08279	-2.11812	9.06342e-12
203288_at	KIAA0355	RAR_RXR	Uncharacterized protein KIAA0355 [Source:UniProtKB/Swiss-Prot;Acc:O15063]	1.4652	2.76101	1.13718e-09	1.55254	2.93333	2.4603e-06	0.87735	1.837	0.00288792	1.05485	2.0775	0.000224772	1.50914	2.8464	4.89082e-07	1.63114	3.09757	6.80543e-09
203333_at	KIFAP3		Kinesin-associated protein 3 (Smg GDS-associated protein) [Source:UniProtKB/Swiss-Prot;Acc:Q92845]	0.799291	1.74025	1.58593e-05	0.752824	1.68509	0.00179158	0.539881	1.45385	3.54642e-05	0.641555	1.56001	1.58125e-07	0.80116	1.7425	1.58719e-08	0.860623	1.81582	3.11013e-11
203344_s_at	RBBP8		Retinoblastoma-binding protein 8 (RBBP-8)(CtBP-interacting protein)(CtIP)(Retinoblastoma-interacting protein and myosin-like)(RIM) [Source:UniProtKB/Swiss-Prot;Acc:Q99708]	-0.854181	-1.80773	2.68157e-06	-0.715217	-1.64173	6.56074e-06	-1.25562	-2.3877	9.03829e-06	-1.51599	-2.85994	3.6263e-11	-1.17025	-2.25051	0.00233259	-1.32671	-2.50831	8.0555e-05
203372_s_at	SOCS2	AhR/Arnt, RAR_RXR	Suppressor of cytokine signaling 2 (SOCS-2)(Cytokine-inducible SH2 protein 2)(CIS-2)(STAT-induced STAT inhibitor 2)(SSI-2) [Source:UniProtKB/Swiss-Prot;Acc:O14508]	2.46535	5.5226	0.000277253	2.16954	4.49881	0.00427955	1.48376	2.79677	4.99286e-05	1.77893	3.43171	2.05086e-07	2.19808	4.5887	1.89187e-09	2.33427	5.04296	9.0043e-12
203373_at	SOCS2	AhR/Arnt, RAR_RXR	Suppressor of cytokine signaling 2 (SOCS-2)(Cytokine-inducible SH2 protein 2)(CIS-2)(STAT-induced STAT inhibitor 2)(SSI-2) [Source:UniProtKB/Swiss-Prot;Acc:O14508]	1.96505	3.90426	0.000625486	1.97853	3.9409	0.0154517	1.61967	3.07305	9.03829e-06	1.88696	3.69856	1.41726e-08	2.02982	4.08355	7.71486e-07	2.18718	4.55413	9.47624e-09
203376_at	CDC40	PAX3, STAF	Pre-mRNA-processing factor 17 (PRP17 homolog)(hPRP17)(Cell division cycle 40 homolog)(EH-binding protein 3)(Ehb3) [Source:UniProtKB/Swiss-Prot;Acc:O60508]	0.733185	1.66231	1.55517e-05	0.644492	1.56319	0.000302282	0.602513	1.51836	1.41862e-08	0.646924	1.56583	5.49363e-09	0.597322	1.51291	8.05483e-05	0.620353	1.53725	6.82277e-05
203405_at	PSMG1		Proteasome assembly chaperone 1 (PAC-1)(Down syndrome critical region protein 2)(Chromosome 21 leucine-rich protein)(C21-LRP) [Source:UniProtKB/Swiss-Prot;Acc:O95456]	-0.882249	-1.84325	8.74906e-07	-1.00608	-2.00845	3.20905e-05	-0.6228	-1.53986	2.96502e-05	-0.779897	-1.71701	1.59838e-10	-0.727417	-1.65567	4.50206e-05	-0.823539	-1.76974	1.40471e-07
203408_s_at	TBC1D5	RAR_RXR	TBC1 domain family member 5 [Source:UniProtKB/Swiss-Prot;Acc:Q92609]	2.26859	4.81852	5.95944e-06	2.45418	5.48002	0.00159306	0.842552	1.79322	2.39291e-05	0.966158	1.95363	1.13299e-06	1.24554	2.37107	4.05084e-08	1.31624	2.49016	6.95484e-09
203445_s_at	CTDSP2		Carboxy-terminal domain RNA polymerase II polypeptide A small phosphatase 2 (EC 3.1.3.16)(Small CTD phosphatase 2)(SCP2)(Nuclear LIM interactor-interacting factor 2)(NLI-interacting factor 2)(Protein OS-4) [Source:UniProtKB/Swiss-Prot;Acc:O14595]	1.43358	2.70116	8.13728e-12	1.42747	2.68974	9.53476e-07	0.649539	1.56867	1.65386e-06	0.761091	1.69477	1.44532e-09	0.643672	1.5623	8.95092e-05	0.681062	1.60332	2.37832e-05
203538_at	CAMLG		Calcium signal-modulating cyclophilin ligand (CAML) [Source:UniProtKB/Swiss-Prot;Acc:P49069]	0.525124	1.43906	1.08705e-06	0.509026	1.42309	3.09005e-05	0.455661	1.37141	0.000797759	0.531783	1.44571	0.000101258	0.695094	1.61899	6.44788e-07	0.736533	1.66617	6.842e-08
203552_at	MAP4K5		Mitogen-activated protein kinase kinase kinase kinase 5 (EC 2.7.11.1)(MAPK/ERK kinase kinase kinase 5)(MEK kinase kinase 5)(MEKKK 5)(Kinase homologous to SPS1/STE20)(KHS) [Source:UniProtKB/Swiss-Prot;Acc:Q9Y4K4]	-0.52811	-1.44204	0.000109272	-0.517306	-1.43128	0.00101661	-0.576031	-1.49074	6.27653e-06	-0.635285	-1.55324	3.16406e-07	-0.438399	-1.3551	0.0119373	-0.492773	-1.40715	0.00430019
203553_s_at	MAP4K5		Mitogen-activated protein kinase kinase kinase kinase 5 (EC 2.7.11.1)(MAPK/ERK kinase kinase kinase 5)(MEK kinase kinase 5)(MEKKK 5)(Kinase homologous to SPS1/STE20)(KHS) [Source:UniProtKB/Swiss-Prot;Acc:Q9Y4K4]	-0.632998	-1.55078	1.38331e-05	-0.732248	-1.66123	0.000579705	-0.868054	-1.8252	6.37503e-09	-0.949251	-1.93087	2.34322e-09	-0.603181	-1.51906	0.00941705	-0.607423	-1.52353	0.0147481
203575_at	CSNK2A2	RAR_RXR	Casein kinase II subunit alpha' (CK II)(EC 2.7.11.1) [Source:UniProtKB/Swiss-Prot;Acc:P19784]	1.25388	2.38482	6.33871e-10	1.02857	2.04001	4.13659e-06	0.65429	1.57384	2.45995e-05	0.772527	1.70826	3.99533e-07	0.884342	1.84592	6.62735e-07	0.914522	1.88495	3.73059e-08
203622_s_at	PNO1		RNA-binding protein PNO1 [Source:UniProtKB/Swiss-Prot;Acc:Q9NRX1]	-1.09354	-2.13398	1.36541e-06	-1.1699	-2.24996	9.4215e-05	-0.644769	-1.56349	0.000101418	-0.781593	-1.71903	6.88045e-08	-0.692636	-1.61623	0.000656218	-0.761077	-1.69476	3.75663e-05
203647_s_at	FDX1		Adrenodoxin, mitochondrial Precursor (Adrenal ferredoxin)(Ferredoxin-1)(Hepatoredoxin) [Source:UniProtKB/Swiss-Prot;Acc:P10109]	-0.503169	-1.41732	0.00921625	-0.717852	-1.64473	0.00245336	-0.417586	-1.33569	0.00085185	-0.497379	-1.41165	5.24734e-05	-0.592474	-1.50783	3.09595e-06	-0.632484	-1.55023	4.17672e-07
203692_s_at	E2F3	AhR/Arnt, OLF-1, PAX9, STAF	Transcription factor E2F3 (E2F-3) [Source:UniProtKB/Swiss-Prot;Acc:O00716]	-0.773405	-1.7093	1.29256e-09	-0.751101	-1.68308	2.81839e-05	-1.18903	-2.28	1.0125e-09	-1.22692	-2.34067	2.30835e-10	-0.933027	-1.90928	0.000900785	-0.882911	-1.84409	0.0021553
203693_s_at	E2F3	AhR/Arnt, OLF-1, PAX9, STAF	Transcription factor E2F3 (E2F-3) [Source:UniProtKB/Swiss-Prot;Acc:O00716]	-1.79753	-3.47625	4.30234e-10	-1.74813	-3.35924	6.73266e-06	-2.05774	-4.16335	1.31189e-10	-2.28314	-4.86737	1.01093e-14	-1.62522	-3.0849	0.000219923	-1.67036	-3.18294	0.000167346
203728_at	BAK1		Bcl-2 homologous antagonist/killer (Apoptosis regulator BAK)(Bcl-2-like protein 7)(Bcl2-L-7) [Source:UniProtKB/Swiss-Prot;Acc:Q16611]	-0.41127	-1.32986	0.00135645	-0.404361	-1.3235	0.00541011	-0.651843	-1.57117	1.85054e-05	-0.750806	-1.68273	1.01388e-06	-0.745512	-1.67657	4.50206e-05	-0.796651	-1.73706	7.96702e-06
203740_at	MPHOSPH6		M-phase phosphoprotein 6 [Source:UniProtKB/Swiss-Prot;Acc:Q99547]	-0.724356	-1.65216	2.20653e-08	-0.752758	-1.68501	2.48044e-05	-0.690665	-1.61403	2.61649e-07	-0.678986	-1.60101	1.48293e-06	-0.49869	-1.41293	0.0177073	-0.467021	-1.38225	0.035506
203743_s_at	TDG		G/T mismatch-specific thymine DNA glycosylase (EC 3.2.2.-) [Source:UniProtKB/Swiss-Prot;Acc:Q13569]	-0.823952	-1.77025	3.61195e-06	-0.791609	-1.731	2.89643e-05	-0.489137	-1.4036	0.000492193	-0.600287	-1.51602	1.487e-06	-0.480953	-1.39567	0.00598632	-0.543008	-1.45701	0.000472877
203758_at	CTSO		Cathepsin O Precursor (EC 3.4.22.42) [Source:UniProtKB/Swiss-Prot;Acc:P43234]	1.13932	2.20277	3.07139e-06	1.1359	2.19756	0.000547583	1.0424	2.05965	3.37703e-06	1.22741	2.34146	7.72777e-09	1.08361	2.11933	7.08556e-05	1.14969	2.21866	1.8321e-05
204027_s_at	METTL1		tRNA (guanine-N(7)-)-methyltransferase (EC 2.1.1.33)(tRNA(m7G46)-methyltransferase)(Methyltransferase-like protein 1) [Source:UniProtKB/Swiss-Prot;Acc:Q9UBP6]	-0.568694	-1.48318	0.00608978	-0.642027	-1.56052	0.00857487	-0.467388	-1.3826	0.007911	-0.537426	-1.45138	0.000828578	-0.519885	-1.43384	0.00893544	-0.562584	-1.47691	0.00364978
204094_s_at	TSC22D2	PAX9, RAR_RXR, STAF	TSC22 domain family protein 2 (TSC22-related-inducible leucine zipper protein 4) [Source:UniProtKB/Swiss-Prot;Acc:O75157]	-0.487016	-1.40154	0.00478785	-0.414827	-1.33314	0.0353653	-0.457001	-1.37268	0.00602363	-0.488314	-1.4028	0.00664742	-0.469086	-1.38423	0.0160829	-0.490006	-1.40445	0.0144412
204112_s_at	HNMT		Histamine N-methyltransferase (HMT)(EC 2.1.1.8) [Source:UniProtKB/Swiss-Prot;Acc:P50135]	1.45355	2.73881	5.81863e-07	1.56789	2.9647	0.000167798	1.00679	2.00944	0.000135026	1.17689	2.26088	5.53344e-06	1.09672	2.13867	0.000213109	1.17186	2.25302	5.7677e-05
204131_s_at	FOXO3	RAR_RXR	Forkhead box protein O3 (Forkhead in rhabdomyosarcoma-like 1)(AF6q21 protein) [Source:UniProtKB/Swiss-Prot;Acc:O43524]	1.53685	2.9016	4.71096e-10	1.68349	3.21204	1.75558e-07	1.1934	2.28691	5.29176e-06	1.41634	2.66908	2.98964e-09	1.14233	2.20737	0.000287032	1.25501	2.38669	3.19166e-05
204132_s_at	FOXO3	RAR_RXR	Forkhead box protein O3 (Forkhead in rhabdomyosarcoma-like 1)(AF6q21 protein) [Source:UniProtKB/Swiss-Prot;Acc:O43524]	1.17205	2.25331	1.39386e-06	1.27987	2.42818	2.58814e-05	0.729178	1.65769	0.00106276	0.937964	1.91582	5.6267e-07	0.833143	1.78156	0.00183284	0.953641	1.93675	5.89916e-05
204137_at	GPR137B		Integral membrane protein GPR137B (Transmembrane 7 superfamily member 1 protein) [Source:UniProtKB/Swiss-Prot;Acc:O60478]	1.4951	2.81883	1.35335e-08	1.69207	3.2312	1.52368e-05	0.601317	1.5171	0.00639031	0.80065	1.74189	5.4437e-06	0.912806	1.8827	7.9173e-05	1.01364	2.019	3.89372e-08
204141_at	TUBB2A		Tubulin beta-2A chain [Source:UniProtKB/Swiss-Prot;Acc:Q13885]	-1.34559	-2.54135	6.31964e-12	-1.30325	-2.46785	3.30411e-06	-1.17885	-2.26397	2.5927e-06	-1.1955	-2.29025	7.52917e-06	-1.16601	-2.2439	0.000194662	-1.15416	-2.22555	0.000306333
204177_s_at	KLHL20		Kelch-like protein 20 (Kelch-like ECT2-interacting protein)(Kelch-like protein X) [Source:UniProtKB/Swiss-Prot;Acc:Q9Y2M5]	0.701846	1.62658	3.83744e-05	0.807781	1.75052	0.000264897	0.544909	1.45893	0.000105513	0.539788	1.45376	0.000178452	0.477099	1.39194	0.0103845	0.458914	1.37451	0.0185691
204224_s_at	GCH1	STAF	GTP cyclohydrolase 1 (EC 3.5.4.16)(GTP cyclohydrolase I)(GTP-CH-I) [Source:UniProtKB/Swiss-Prot;Acc:P30793]	-0.72846	-1.65687	0.000592735	-0.760952	-1.69461	0.00105701	-0.617067	-1.53375	0.0433655	-0.824029	-1.77034	0.00171269	-1.38604	-2.6136	6.56867e-08	-1.51071	-2.84951	5.73093e-13
204254_s_at	VDR		Vitamin D3 receptor (VDR)(1,25-dihydroxyvitamin D3 receptor)(Nuclear receptor subfamily 1 group I member 1) [Source:UniProtKB/Swiss-Prot;Acc:P11473]	-1.51222	-2.85248	2.50033e-17	-1.45039	-2.73281	4.38152e-09	-0.903689	-1.87084	1.39897e-08	-1.06385	-2.0905	9.15226e-16	-0.897505	-1.86284	9.50978e-05	-0.947748	-1.92886	1.36105e-05
204255_s_at	VDR		Vitamin D3 receptor (VDR)(1,25-dihydroxyvitamin D3 receptor)(Nuclear receptor subfamily 1 group I member 1) [Source:UniProtKB/Swiss-Prot;Acc:P11473]	-1.59694	-3.025	1.52894e-15	-1.54134	-2.91065	3.53423e-09	-0.893441	-1.8576	2.49957e-07	-1.05249	-2.07411	5.18926e-12	-0.965744	-1.95307	1.54306e-05	-1.03558	-2.04993	6.94808e-07
204256_at	ELOVL6		Elongation of very long chain fatty acids protein 6 (hELO2)(Fatty acyl-CoA elongase)(Long-chain fatty-acyl elongase) [Source:UniProtKB/Swiss-Prot;Acc:Q9H5J4]	-0.912563	-1.88239	0.00382743	-0.635571	-1.55355	0.0244235	-1.02353	-2.03289	9.76547e-05	-1.22191	-2.33255	1.48462e-06	-1.06335	-2.08978	0.000396768	-1.17048	-2.25086	5.40299e-05
204262_s_at	CABC1		Chaperone activity of bc1 complex-like, mitochondrial Precursor (Chaperone-ABC1-like)(aarF domain-containing protein kinase 3) [Source:UniProtKB/Swiss-Prot;Acc:Q8NI60]	-0.720844	-1.64815	0.000418304	-1.07105	-2.10096	1.00649e-06	-0.561748	-1.47606	0.00283345	-0.6006	-1.51635	0.00205715	-0.891821	-1.85552	1.35019e-05	-0.904132	-1.87142	1.08752e-05
204290_s_at	ALDH6A1		Methylmalonate-semialdehyde dehydrogenase [acylating], mitochondrial Precursor (MMSDH)(Malonate-semialdehyde dehydrogenase [acylating])(EC 1.2.1.27)(EC 1.2.1.18)(Aldehyde dehydrogenase family 6 member A1) [Source:UniProtKB/Swiss-Prot;Acc:Q02252]	0.704946	1.63008	0.000330292	0.833302	1.78176	0.000249721	0.482625	1.39728	0.00501835	0.640857	1.55925	1.14973e-05	0.624076	1.54122	0.00126415	0.708504	1.63411	2.33963e-05
204297_at	PIK3C3		Phosphatidylinositol 3-kinase catalytic subunit type 3 (PtdIns-3-kinase type 3)(PI3-kinase type 3)(PI3K type 3)(EC 2.7.1.137)(Phosphoinositide-3-kinase class 3)(Phosphatidylinositol 3-kinase p100 subunit) [Source:UniProtKB/Swiss-Prot;Acc:Q8NEB9]	0.474994	1.38991	0.00501017	0.412954	1.33141	0.0235653	0.62648	1.54379	0.00010834	0.722449	1.64998	1.56849e-06	0.987104	1.9822	5.23918e-09	1.05917	2.08374	3.09986e-12
204353_s_at	POT1		Protection of telomeres protein 1 (hPot1)(POT1-like telomere end-binding protein) [Source:UniProtKB/Swiss-Prot;Acc:Q9NUX5]	0.58129	1.49619	0.00349196	0.577514	1.49228	0.00806846	0.592362	1.50771	0.000233565	0.6581	1.578	6.98363e-05	0.892104	1.85588	8.40825e-08	0.911844	1.88145	2.75282e-08
204354_at	POT1		Protection of telomeres protein 1 (hPot1)(POT1-like telomere end-binding protein) [Source:UniProtKB/Swiss-Prot;Acc:Q9NUX5]	0.446905	1.36311	0.00756211	0.454942	1.37073	0.0197108	0.555846	1.47003	4.21439e-05	0.608878	1.52507	1.24077e-05	0.854308	1.80789	1.83422e-09	0.889694	1.85278	6.64364e-10
204493_at	BID		BH3-interacting domain death agonist (p22 BID)(BID) [Contains BH3-interacting domain death agonist p15(p15 BID);BH3-interacting domain death agonist p13(p13 BID);BH3-interacting domain death agonist p11(p11 BID)] [Source:UniProtKB/Swiss-Prot;Acc:P55957]	-0.935794	-1.91294	0.000293689	-0.802012	-1.74353	0.0334932	-0.905813	-1.8736	1.88574e-08	-1.00732	-2.01017	3.83455e-09	-0.77721	-1.71381	0.000159045	-0.84674	-1.79843	0.000128343
204517_at	PPIC		Peptidyl-prolyl cis-trans isomerase C (PPIase)(Rotamase)(EC 5.2.1.8)(Cyclophilin C) [Source:UniProtKB/Swiss-Prot;Acc:P45877]	-0.641412	-1.55985	9.54513e-06	-0.579019	-1.49383	0.00170698	-0.530182	-1.44411	8.75456e-05	-0.576824	-1.49156	2.80086e-05	-0.812633	-1.75641	6.89378e-11	-0.825269	-1.77187	2.5598e-11
204518_s_at	PPIC		Peptidyl-prolyl cis-trans isomerase C (PPIase)(Rotamase)(EC 5.2.1.8)(Cyclophilin C) [Source:UniProtKB/Swiss-Prot;Acc:P45877]	-0.828209	-1.77548	7.99709e-05	-0.750143	-1.68196	0.00386432	-0.621639	-1.53862	3.45512e-05	-0.676945	-1.59875	1.08524e-05	-0.881637	-1.84246	3.37934e-09	-0.904952	-1.87248	1.30101e-09
204547_at	RAB40B		Ras-related protein Rab-40B (SOCS box-containing protein RAR)(Rar protein) [Source:UniProtKB/Swiss-Prot;Acc:Q12829]	0.672715	1.59407	4.88293e-05	0.546059	1.46009	0.00337158	0.745949	1.67708	0.000637762	0.929693	1.90487	1.7346e-06	1.05864	2.08297	0.000177553	1.15588	2.2282	6.74476e-06
204610_s_at	CCDC85B	RAR_RXR	Coiled-coil domain-containing protein 85B (Hepatitis delta antigen-interacting protein A)(Delta-interacting protein A) [Source:UniProtKB/Swiss-Prot;Acc:Q15834]	-1.4634	-2.75758	4.04941e-08	-1.44884	-2.72989	4.68132e-05	-0.672705	-1.59406	0.000231073	-0.747901	-1.67935	5.21758e-05	-0.825714	-1.77241	6.30778e-05	-0.863501	-1.81945	2.11267e-05
204710_s_at	WIPI2		WD repeat domain phosphoinositide-interacting protein 2 (WIPI-2)(WIPI49-like protein 2) [Source:UniProtKB/Swiss-Prot;Acc:Q9Y4P8]	1.51583	2.85964	1.60532e-15	1.37198	2.58826	3.53423e-09	0.776787	1.71331	4.94885e-09	0.892708	1.85666	6.08773e-13	0.729856	1.65847	0.000127231	0.782238	1.7198	3.5375e-05
204717_s_at	SLC29A2	RAR_RXR	Equilibrative nucleoside transporter 2 (Equilibrative nitrobenzylmercaptopurine riboside-insensitive nucleoside transporter)(Equilibrative NBMPR-insensitive nucleoside transporter)(Nucleoside transporter, ei-type)(Solute carrier family 29 member 2)(Hydrophobic nucleolar protein, 36 kDa)(36 kDa nucleolar protein HNP36)(Delayed-early response protein 12) [Source:UniProtKB/Swiss-Prot;Acc:Q14542]	-1.47298	-2.77594	1.60744e-05	-1.53608	-2.90006	0.000371217	-0.745271	-1.67629	0.0011631	-0.879837	-1.84017	1.68168e-05	-0.614505	-1.53103	0.027266	-0.692811	-1.61643	0.00554878
204788_s_at	PPOX	OLF-1	Protoporphyrinogen oxidase (PPO)(EC 1.3.3.4) [Source:UniProtKB/Swiss-Prot;Acc:P50336]	1.36848	2.58199	5.70009e-07	1.4294	2.69335	3.78677e-05	0.508525	1.4226	0.00932064	0.673347	1.59477	4.51519e-05	0.880009	1.84039	3.95286e-06	0.994293	1.9921	3.70935e-10
204799_at	ZBED4		Zinc finger BED domain-containing protein 4 [Source:UniProtKB/Swiss-Prot;Acc:O75132]	-0.776961	-1.71352	2.3517e-06	-0.70111	-1.62576	0.000411534	-0.900845	-1.86716	1.06092e-06	-1.02353	-2.03289	2.57467e-08	-0.759861	-1.69333	0.00354009	-0.82165	-1.76743	0.00142709
204820_s_at	BTN3A2		Butyrophilin subfamily 3 member A2 Precursor [Source:UniProtKB/Swiss-Prot;Acc:P78410]	1.61396	3.06091	0.000407968	1.58633	3.00284	0.0209832	0.780634	1.71789	0.00331552	0.953122	1.93606	4.211e-05	1.32329	2.50237	1.60367e-06	1.4949	2.81845	4.74911e-09
204839_at	POP5		Ribonuclease P/MRP protein subunit POP5 (hPop5)(EC 3.1.26.5) [Source:UniProtKB/Swiss-Prot;Acc:Q969H6]	-0.452808	-1.3687	2.15263e-05	-0.452661	-1.36856	0.000266493	-0.816665	-1.76133	0.000311835	-0.952024	-1.93458	2.29932e-05	-0.603363	-1.51925	0.0435086	-0.65644	-1.57619	0.0273438
204905_s_at	EEF1E1		Eukaryotic translation elongation factor 1 epsilon-1 (Multisynthetase complex auxiliary component p18)(Elongation factor p18) [Source:UniProtKB/Swiss-Prot;Acc:O43324]	-0.701648	-1.62636	0.000117798	-0.716196	-1.64284	0.00085664	-0.511029	-1.42507	5.81208e-07	-0.616846	-1.53352	1.35695e-12	-0.436791	-1.35359	0.00286791	-0.486133	-1.40069	0.000462385
204949_at	ICAM3		Intercellular adhesion molecule 3 Precursor (ICAM-3)(ICAM-R)(CDw50)(CD50 antigen) [Source:UniProtKB/Swiss-Prot;Acc:P32942]	-0.915124	-1.88573	4.80424e-05	-0.780715	-1.71798	0.000282022	-0.524646	-1.43858	0.0131047	-0.648558	-1.5676	0.00191953	-0.576275	-1.49099	0.0179574	-0.631358	-1.54902	0.00909951
204976_s_at	AMMECR1		AMME syndrome candidate gene 1 protein [Source:UniProtKB/Swiss-Prot;Acc:Q9Y4X0]	-0.878083	-1.83793	2.51166e-06	-0.824754	-1.77123	1.23524e-05	-0.466526	-1.38178	1.52698e-06	-0.53648	-1.45043	9.50574e-09	-0.400141	-1.31964	0.00559552	-0.430429	-1.34763	0.00226687
205022_s_at	FOXN3		Forkhead box protein N3 (Checkpoint suppressor 1) [Source:UniProtKB/Swiss-Prot;Acc:O00409]	1.1528	2.22346	3.71754e-10	1.24915	2.37701	2.17681e-06	0.443444	1.35985	0.0213745	0.613883	1.53037	0.00010064	0.791192	1.7305	1.43479e-05	0.885661	1.84761	1.92169e-09
205052_at	AUH		Methylglutaconyl-CoA hydratase, mitochondrial Precursor (EC 4.2.1.18)(AU-specific RNA-binding enoyl-CoA hydratase)(AU-binding protein/enoyl-CoA hydratase) [Source:UniProtKB/Swiss-Prot;Acc:Q13825]	1.86428	3.64085	1.29029e-07	1.81806	3.52606	0.000306701	0.603161	1.51904	6.09993e-06	0.701423	1.62611	4.07992e-08	0.79828	1.73903	4.53949e-08	0.845133	1.79643	9.95971e-10
205167_s_at	CDC25C		M-phase inducer phosphatase 3 (EC 3.1.3.48)(Dual specificity phosphatase Cdc25C) [Source:UniProtKB/Swiss-Prot;Acc:P30307]	0.663345	1.58375	0.0200408	0.701209	1.62587	0.0106668	0.676916	1.59872	0.005825	0.538058	1.45202	0.0118367	0.770046	1.70532	0.00183568	0.737935	1.66779	0.00103895
205241_at	SCO2		Protein SCO2 homolog, mitochondrial Precursor [Source:UniProtKB/Swiss-Prot;Acc:O43819]	-0.835248	-1.78416	0.00152644	-0.727724	-1.65602	0.0470107	-0.670666	-1.59181	2.87762e-06	-0.714801	-1.64126	2.91831e-06	-0.543779	-1.45779	0.00499486	-0.531616	-1.44555	0.00877695
205282_at	LRP8	AhR/Arnt, OLF-1	Low-density lipoprotein receptor-related protein 8 Precursor (Apolipoprotein E receptor 2) [Source:UniProtKB/Swiss-Prot;Acc:Q14114]	-1.30464	-2.47023	0.00154545	-2.10934	-4.31495	0.000270518	-1.4411	-2.71528	0.00636457	-1.93448	-3.82239	9.31013e-06	-2.47697	-5.56726	1.06335e-07	-2.81885	-7.05599	2.19443e-15
205335_s_at	SRP19		Signal recognition particle 19 kDa protein (SRP19) [Source:UniProtKB/Swiss-Prot;Acc:P09132]	-0.716746	-1.64347	7.41059e-05	-0.81491	-1.75919	0.000774588	-0.630621	-1.54823	1.86745e-09	-0.676438	-1.59819	3.58756e-10	-0.447137	-1.36333	0.00541904	-0.464736	-1.38006	0.00549223
205438_at	PTPN21		Tyrosine-protein phosphatase non-receptor type 21 (EC 3.1.3.48)(Protein-tyrosine phosphatase D1) [Source:UniProtKB/Swiss-Prot;Acc:Q16825]	0.797387	1.73795	5.34307e-06	0.651403	1.5707	0.00582537	1.22174	2.33227	1.29094e-05	1.41461	2.66589	6.7654e-09	1.50897	2.84607	7.09377e-07	1.6336	3.10286	1.23796e-09
205486_at	TESK2	PAX3	Dual specificity testis-specific protein kinase 2 (EC 2.7.12.1)(Testicular protein kinase 2) [Source:UniProtKB/Swiss-Prot;Acc:Q96S53]	0.992694	1.9899	3.16353e-05	0.903456	1.87054	0.00286358	0.764267	1.69851	6.37503e-09	0.698629	1.62296	1.58481e-07	0.788978	1.72785	1.97275e-06	0.748558	1.68011	4.22568e-06
205518_s_at	CMAH		cytidine monophosphate-N-acetylneuraminic acid hydroxylase (CMP-N-acetylneuraminate monooxygenase) pseudogene (CMAH), transcript variant 1, non-coding RNA [Source:RefSeq DNA;Acc:NR_002174]	2.89016	7.41354	5.63891e-11	2.77563	6.84773	1.30946e-05	0.93533	1.91233	0.000434821	1.17616	2.25975	3.02789e-07	1.2939	2.4519	1.25398e-06	1.41212	2.66128	1.63819e-09
205565_s_at	FXN		Frataxin, mitochondrial Precursor (Friedreich ataxia protein)(Fxn) [Contains Frataxin intermediate form;Frataxin(56-210);Frataxin(81-210)] [Source:UniProtKB/Swiss-Prot;Acc:Q16595]	-0.477371	-1.3922	9.54827e-08	-0.591995	-1.50733	1.87748e-05	-0.419939	-1.33787	0.00693918	-0.498861	-1.4131	0.00117097	-0.479196	-1.39397	0.00446222	-0.515695	-1.42968	0.00195837
205661_s_at	FLAD1		FAD synthetase (EC 2.7.7.2)(FMN adenylyltransferase)(FAD pyrophosphorylase)(Flavin adenine dinucleotide synthetase) [Includes Molybdenum cofactor biosynthesis protein-like region;FAD synthetase region] [Source:UniProtKB/Swiss-Prot;Acc:Q8NFF5]	-1.04674	-2.06586	1.33438e-08	-1.16039	-2.23518	2.13555e-06	-0.640152	-1.55849	2.67005e-05	-0.65047	-1.56968	3.55804e-05	-0.438611	-1.3553	0.0397001	-0.43411	-1.35108	0.0438826
205871_at	PLGLA		plasminogen-like A (PLGLA), non-coding RNA [Source:RefSeq DNA;Acc:NR_003506]	0.886073	1.84814	0.000121304	0.798203	1.73893	0.0248162	0.518996	1.43296	0.00916482	0.711275	1.63725	4.84201e-05	0.642797	1.56135	0.00552679	0.788286	1.72702	1.86622e-05
205895_s_at	NOLC1		Nucleolar phosphoprotein p130 (Nucleolar 130 kDa protein)(140 kDa nucleolar phosphoprotein)(Nopp140)(Nucleolar and coiled-body phosphoprotein 1)(HCV NS5A trans-regulated protein 13)(NS5ATP13) [Source:UniProtKB/Swiss-Prot;Acc:Q14978]	-0.506376	-1.42048	0.000866614	-0.521437	-1.43538	0.0138205	-0.808756	-1.7517	0.000159379	-1.01157	-2.0161	6.89128e-06	-1.17087	-2.25147	1.90416e-07	-1.30777	-2.47558	2.86332e-09
205963_s_at	DNAJA3		DnaJ homolog subfamily A member 3, mitochondrial Precursor (Tumorous imaginal discs protein Tid56 homolog)(DnaJ protein Tid-1)(hTid-1)(Hepatocellular carcinoma-associated antigen 57) [Source:UniProtKB/Swiss-Prot;Acc:Q96EY1]	-0.761494	-1.69525	0.0104022	-0.945569	-1.92595	0.00206295	-0.664787	-1.58533	0.00456027	-0.645529	-1.56431	0.00653001	-0.605881	-1.52191	0.0456871	-0.610981	-1.5273	0.0387128
206245_s_at	IVNS1ABP	PAX3, RAR_RXR	Influenza virus NS1A-binding protein (NS1-binding protein)(NS1-BP)(Aryl hydrocarbon receptor-associated protein 3) [Source:UniProtKB/Swiss-Prot;Acc:Q9Y6Y0]	-1.21711	-2.3248	4.19064e-06	-1.10253	-2.14731	0.00517401	-0.766379	-1.701	1.61322e-08	-0.825567	-1.77223	4.3899e-09	-0.455017	-1.3708	0.0297911	-0.448029	-1.36418	0.0398341
207088_s_at	SLC25A11		Mitochondrial 2-oxoglutarate/malate carrier protein (OGCP)(Solute carrier family 25 member 11) [Source:UniProtKB/Swiss-Prot;Acc:Q02978]	-1.28991	-2.44513	1.47543e-07	-1.3813	-2.60502	5.22308e-05	-0.673025	-1.59441	0.00202414	-0.735	-1.6644	0.000819933	-0.911694	-1.88125	0.000159045	-0.944433	-1.92443	5.48138e-05
207121_s_at	MAPK6	PAX3, RAR_RXR	Mitogen-activated protein kinase 6 (EC 2.7.11.24)(Extracellular signal-regulated kinase 3)(ERK-3)(MAP kinase isoform p97)(p97-MAPK) [Source:UniProtKB/Swiss-Prot;Acc:Q16659]	-0.619322	-1.53615	0.000378515	-0.417086	-1.33523	0.00113595	-0.524845	-1.43878	0.000153742	-0.59661	-1.51216	1.59232e-05	-0.477583	-1.39241	0.0127531	-0.523043	-1.43698	0.00618783
207163_s_at	AKT1	RAR_RXR	RAC-alpha serine/threonine-protein kinase (EC 2.7.11.1)(RAC-PK-alpha)(Protein kinase B)(PKB)(C-AKT) [Source:UniProtKB/Swiss-Prot;Acc:P31749]	-0.905038	-1.87259	2.67787e-07	-0.861964	-1.81751	0.000196538	-0.586446	-1.50154	0.000749439	-0.645993	-1.56482	0.000267323	-0.881452	-1.84223	6.20433e-07	-0.941396	-1.92038	9.58388e-08
207170_s_at	LETMD1		LETM1 domain-containing protein 1 (Cervical cancer 1 proto-oncogene protein p40)(Cervical cancer proto-oncogene 2 protein)(HCRR-2) [Source:UniProtKB/Swiss-Prot;Acc:Q6P1Q0]	0.999039	1.99867	5.33281e-08	1.00536	2.00744	2.13929e-05	0.655096	1.57472	7.06433e-05	0.764034	1.69823	3.26049e-06	0.807004	1.74957	1.1491e-05	0.849328	1.80166	3.64379e-06
207186_s_at	AC132812.1		Importin subunit alpha-2-like protein [Source:UniProtKB/Swiss-Prot;Acc:A8MYJ9]	0.4997	1.41392	0.0235998	0.498933	1.41317	0.0466763	0.414897	1.3332	7.11035e-05	0.478557	1.39335	3.65683e-06	0.506739	1.42084	0.000106206	0.546279	1.46031	1.74805e-05
207625_s_at	CBFA2T2	PAX3, STAF	Protein CBFA2T2 (MTG8-related protein 1)(MTG8-like protein)(Myeloid translocation-related protein 1)(ETO homologous on chromosome 20)(p85) [Source:UniProtKB/Swiss-Prot;Acc:O43439]	0.782102	1.71963	0.000202842	0.641516	1.55997	0.00296736	0.566503	1.48093	0.00148351	0.716897	1.64364	1.19249e-06	0.578808	1.49361	0.0116427	0.672276	1.59359	0.00065089
207655_s_at	BLNK	PAX3	B-cell linker protein (Cytoplasmic adapter protein)(B-cell adapter containing a SH2 domain protein)(B-cell adapter containing a Src homology 2 domain protein)(Src homology 2 domain-containing leukocyte protein of 65 kDa)(SLP-65) [Source:UniProtKB/Swiss-Prot;Acc:Q8WV28]	1.50761	2.84338	1.27911e-06	1.81046	3.50753	3.63779e-05	1.05483	2.07748	0.00881657	1.33969	2.53097	0.00032718	1.43241	2.69898	0.000496142	1.58791	3.00613	4.46805e-05
207761_s_at	METTL7A		Methyltransferase-like protein 7A Precursor (EC 2.1.1.-)(Protein AAM-B) [Source:UniProtKB/Swiss-Prot;Acc:Q9H8H3]	2.13	4.37718	5.44053e-06	1.87248	3.66161	0.000217863	0.586842	1.50196	0.00178052	0.679824	1.60194	0.000320866	1.08282	2.11818	3.40101e-10	1.1303	2.18905	9.4161e-12
207843_x_at	CYB5A		Cytochrome b5 [Source:UniProtKB/Swiss-Prot;Acc:P00167]	-0.993	-1.99032	1.94488e-06	-0.934773	-1.91159	3.50919e-07	-0.423713	-1.34137	1.54324e-05	-0.407642	-1.32652	6.61666e-05	-0.575833	-1.49054	1.83851e-08	-0.553669	-1.46781	3.09383e-08
207980_s_at	CITED2	PAX3, RXR_RAR	Cbp/p300-interacting transactivator 2 (MSG-related protein 1)(MRG-1)(P35srj) [Source:UniProtKB/Swiss-Prot;Acc:Q99967]	1.35646	2.56056	0.00166836	0.922639	1.89558	0.0361966	0.835841	1.7849	7.75443e-07	0.97371	1.96388	3.1747e-10	0.715577	1.64214	0.00136447	0.769042	1.70414	0.000457227
208009_s_at	ARHGEF16		Rho guanine nucleotide exchange factor 16 [Source:UniProtKB/Swiss-Prot;Acc:Q5VV41]	-0.54251	-1.4565	2.54604e-05	-0.539649	-1.45362	0.00291821	-0.64483	-1.56356	0.00162505	-0.567011	-1.48145	0.00229453	-0.755402	-1.6881	0.00144133	-0.67953	-1.60162	0.000888474
208012_x_at	SP110		Sp110 nuclear body protein (Transcriptional coactivator Sp110)(Speckled 110 kDa)(Interferon-induced protein 41/75) [Source:UniProtKB/Swiss-Prot;Acc:Q9HB58]	1.17189	2.25307	4.19161e-07	1.17277	2.25445	0.00134248	0.703011	1.6279	0.000736414	0.884312	1.84588	1.00744e-06	1.04629	2.06521	2.02183e-06	1.16389	2.2406	8.78722e-10
208152_s_at	DDX21		Nucleolar RNA helicase 2 (EC 3.6.1.-)(Nucleolar RNA helicase II)(Nucleolar RNA helicase Gu)(RH II/Gu)(Gu-alpha)(DEAD box protein 21) [Source:UniProtKB/Swiss-Prot;Acc:Q9NR30]	-0.70225	-1.62704	0.000249563	-0.580707	-1.49558	0.0028753	-0.505202	-1.41932	0.00167896	-0.647071	-1.56599	6.60278e-06	-0.772902	-1.7087	7.68744e-06	-0.854551	-1.8082	2.41533e-08
208313_s_at	SF1	PAX3	Splicing factor 1 (Zinc finger protein 162)(Transcription factor ZFM1)(Zinc finger gene in MEN1 locus)(Mammalian branch point-binding protein mBBP)(BBP) [Source:UniProtKB/Swiss-Prot;Acc:Q15637]	-0.551976	-1.46609	0.0032245	-0.621558	-1.53854	1.70781e-05	-0.456995	-1.37268	5.2642e-05	-0.506484	-1.42058	7.12906e-06	-0.532729	-1.44666	0.000153214	-0.55367	-1.46781	6.00928e-05
208424_s_at	CIAPIN1		Anamorsin (Cytokine-induced apoptosis inhibitor 1) [Source:UniProtKB/Swiss-Prot;Acc:Q6FI81]	-0.418284	-1.33634	0.00021141	-0.515903	-1.42989	0.000254089	-0.781504	-1.71892	1.11147e-10	-0.804	-1.74593	2.49935e-10	-0.520835	-1.43479	0.00567251	-0.518641	-1.4326	0.00807594
208433_s_at	LRP8	AhR/Arnt, OLF-1	Low-density lipoprotein receptor-related protein 8 Precursor (Apolipoprotein E receptor 2) [Source:UniProtKB/Swiss-Prot;Acc:Q14114]	-1.87933	-3.67905	5.07108e-05	-2.43922	-5.42349	0.000354919	-1.29261	-2.4497	0.00784937	-1.73639	-3.332	1.78682e-05	-2.25466	-4.77222	1.3165e-07	-2.53825	-5.80883	6.89485e-14
208456_s_at	RRAS2		Ras-related protein R-Ras2 Precursor (Ras-like protein TC21)(Teratocarcinoma oncogene) [Source:UniProtKB/Swiss-Prot;Acc:P62070]	-0.403638	-1.32284	0.00939068	-0.473435	-1.38841	0.000712031	-0.656138	-1.57586	0.000444052	-0.727173	-1.65539	0.000163836	-1.12207	-2.17659	4.54117e-11	-1.15391	-2.22517	6.74355e-12
208546_x_at	HIST1H2BH		Histone H2B type 1-H (H2B.j)(H2B/j) [Source:UniProtKB/Swiss-Prot;Acc:Q93079]	0.848504	1.80063	0.000137477	0.994568	1.99248	0.000565925	0.510236	1.42428	0.0396709	0.700712	1.62531	0.000203712	0.836947	1.78627	0.00126415	0.982308	1.97562	4.41492e-07
208615_s_at	PTP4A2		Protein tyrosine phosphatase type IVA 2 (EC 3.1.3.48)(Protein-tyrosine phosphatase 4a2)(Protein-tyrosine phosphatase of regenerating liver 2)(PRL-2)(PTP(CAAXII))(HU-PP-1)(OV-1) [Source:UniProtKB/Swiss-Prot;Acc:Q12974]	-0.985267	-1.97968	2.47606e-06	-0.831373	-1.77938	0.000712817	-0.41352	-1.33193	6.60712e-05	-0.436881	-1.35367	1.9799e-05	-0.484202	-1.39881	3.81845e-05	-0.488003	-1.4025	2.99781e-05
208624_s_at	EIF4G1	AhR/Arnt, OLF-1, PAX3, STAF	Eukaryotic translation initiation factor 4 gamma 1 (eIF-4-gamma 1)(eIF-4G 1)(eIF-4G1)(p220) [Source:UniProtKB/Swiss-Prot;Acc:Q04637]	-0.730716	-1.65946	0.00705298	-0.847356	-1.7992	0.00432805	-0.55308	-1.46721	0.000318077	-0.620653	-1.53757	7.46901e-05	-0.482539	-1.3972	0.0149996	-0.514221	-1.42822	0.0104688
208636_at	ACTN1	AhR/Arnt, OLF-1	Alpha-actinin-1 (Alpha-actinin cytoskeletal isoform)(Non-muscle alpha-actinin-1)(F-actin cross-linking protein) [Source:UniProtKB/Swiss-Prot;Acc:P12814]	-0.438449	-1.35515	0.00800218	-0.529769	-1.4437	0.00938059	-0.516319	-1.4303	0.0482206	-0.690858	-1.61424	0.00248921	-1.18567	-2.27469	8.07334e-08	-1.29465	-2.45318	5.34657e-13
208671_at	SERINC1		Serine incorporator 1 (Tumor differentially expressed protein 2)(Tumor differentially expressed 1 protein-like) [Source:UniProtKB/Swiss-Prot;Acc:Q9NRX5]	0.40638	1.32536	0.00684615	0.537741	1.4517	0.00762215	0.723805	1.65153	2.79668e-09	0.804211	1.74619	1.52198e-11	0.690425	1.61376	8.16123e-06	0.723776	1.6515	3.98314e-06
208711_s_at	CCND1	AhR/Arnt, PAX9, RAR_RXR	G1/S-specific cyclin-D1 (PRAD1 oncogene)(BCL-1 oncogene) [Source:UniProtKB/Swiss-Prot;Acc:P24385]	-2.88029	-7.36297	7.53643e-11	-2.46923	-5.53749	1.06578e-05	-2.11855	-4.34258	2.02974e-08	-2.38721	-5.23144	9.21737e-10	-2.64129	-6.23891	8.51032e-10	-2.7923	-6.92734	3.64891e-11
208712_at	CCND1	AhR/Arnt, PAX9, RAR_RXR	G1/S-specific cyclin-D1 (PRAD1 oncogene)(BCL-1 oncogene) [Source:UniProtKB/Swiss-Prot;Acc:P24385]	-3.03388	-8.19007	4.99986e-12	-2.72708	-6.62114	2.39849e-06	-2.16813	-4.49441	2.85255e-08	-2.35893	-5.1299	2.13716e-09	-2.69035	-6.45468	1.37617e-09	-2.7659	-6.80171	4.41574e-10
208771_s_at	LTA4H	STAF	Leukotriene A-4 hydrolase (EC 3.3.2.6)(Leukotriene A(4) hydrolase)(LTA-4 hydrolase) [Source:UniProtKB/Swiss-Prot;Acc:P09960]	0.875414	1.83453	3.24375e-08	0.851455	1.80432	6.45554e-05	0.407421	1.32631	0.00783222	0.512951	1.42697	0.000256124	0.741729	1.67218	2.98156e-07	0.810108	1.75334	4.26316e-10
208815_x_at	HSPA4	OLF-1, RAR_RXR	Heat shock 70 kDa protein 4 (Heat shock 70-related protein APG-2)(HSP70RY) [Source:UniProtKB/Swiss-Prot;Acc:P34932]	-0.674376	-1.59591	4.36587e-07	-0.747041	-1.67835	3.3193e-05	-0.525979	-1.43991	3.42762e-06	-0.613376	-1.52984	5.29851e-09	-0.6077	-1.52383	1.88184e-06	-0.64171	-1.56018	1.40013e-07
208868_s_at	GABARAPL3		Gamma-aminobutyric acid receptor-associated protein-like 1 (GABA(A) receptor-associated protein-like 1)(Glandular epithelial cell protein 1)(GEC-1)(Early estrogen-regulated protein) [Source:UniProtKB/Swiss-Prot;Acc:Q9H0R8]	1.6658	3.17288	5.43521e-09	1.39247	2.62528	9.14209e-05	0.849491	1.80187	0.00104108	1.02412	2.03371	2.2628e-05	1.00448	2.00622	0.00109349	1.06832	2.097	0.000226044
208869_s_at	GABARAPL3		Gamma-aminobutyric acid receptor-associated protein-like 1 (GABA(A) receptor-associated protein-like 1)(Glandular epithelial cell protein 1)(GEC-1)(Early estrogen-regulated protein) [Source:UniProtKB/Swiss-Prot;Acc:Q9H0R8]	1.89197	3.71142	1.19763e-10	1.71228	3.27677	1.85458e-05	1.09528	2.13654	4.38126e-05	1.1907	2.28263	1.56234e-05	1.18224	2.26929	0.000126557	1.21456	2.32071	8.32857e-05
208930_s_at	ILF3		Interleukin enhancer-binding factor 3 (Nuclear factor of activated T-cells 90 kDa)(NF-AT-90)(Double-stranded RNA-binding protein 76)(DRBP76)(Translational control protein 80)(TCP80)(Nuclear factor associated with dsRNA)(NFAR)(M-phase phosphoprotein 4)(MPP4) [Source:UniProtKB/Swiss-Prot;Acc:Q12906]	-0.526247	-1.44018	0.0486601	-0.628367	-1.54581	0.0287331	-0.941135	-1.92004	0.000797759	-1.06504	-2.09222	0.000366296	-0.78726	-1.72579	0.040545	-0.843741	-1.7947	0.0304875
208999_at	2010-09-08		Septin-8 [Source:UniProtKB/Swiss-Prot;Acc:Q92599]	-0.550223	-1.46431	0.00151287	-0.691549	-1.61502	1.06298e-05	-0.895921	-1.8608	0.00014516	-0.947072	-1.92796	8.58136e-05	-0.753604	-1.686	0.0099042	-0.730789	-1.65955	0.013276
209002_s_at	CALCOCO1	PAX3, STAF	Calcium-binding and coiled-coil domain-containing protein 1 (Calphoglin)(Sarcoma antigen NY-SAR-3)(Coiled-coil coactivator protein) [Source:UniProtKB/Swiss-Prot;Acc:Q9P1Z2]	3.18584	9.09981	1.5944e-11	3.19096	9.13221	4.02477e-06	0.758757	1.69203	0.0232723	1.03287	2.04609	1.64146e-05	1.38001	2.60269	8.18106e-06	1.57142	2.97197	3.81352e-13
209003_at	SLC25A11		Mitochondrial 2-oxoglutarate/malate carrier protein (OGCP)(Solute carrier family 25 member 11) [Source:UniProtKB/Swiss-Prot;Acc:Q02978]	-2.32364	-5.00595	1.63838e-10	-2.43864	-5.4213	1.24753e-06	-1.39763	-2.63468	3.6938e-05	-1.48687	-2.80281	1.88199e-05	-1.71231	-3.27686	3.28353e-06	-1.73262	-3.3233	3.9971e-06
209020_at	C20orf111		Uncharacterized protein C20orf111 [Source:UniProtKB/Swiss-Prot;Acc:Q9NX31]	1.44772	2.72777	1.32005e-10	1.2981	2.45906	5.15071e-06	0.798296	1.73905	7.04605e-08	0.89134	1.8549	2.58508e-09	0.55558	1.46976	0.0107862	0.577375	1.49213	0.0103698
209034_at	PNRC1	PAX3	Proline-rich nuclear receptor coactivator 1 (Proline-rich protein 2)(B4-2 protein) [Source:UniProtKB/Swiss-Prot;Acc:Q12796]	1.50242	2.83318	5.4159e-07	1.28872	2.44312	9.87327e-05	0.71644	1.64312	1.41862e-08	0.81685	1.76156	5.03637e-11	0.504232	1.41837	0.00629297	0.546865	1.46091	0.0043463
209048_s_at	ZMYND8		Protein kinase C-binding protein 1 (Rack7)(Cutaneous T-cell lymphoma-associated antigen se14-3)(CTCL tumor antigen se14-3)(Zinc finger MYND domain-containing protein 8) [Source:UniProtKB/Swiss-Prot;Acc:Q9ULU4]	0.888756	1.85158	0.0011208	1.0342	2.04798	0.00688914	0.573431	1.48806	0.000570565	0.574065	1.48871	0.00110172	0.771649	1.70722	9.63082e-06	0.760595	1.69419	1.40922e-05
209100_at	IFRD2	RAR_RXR, STAF	Interferon-related developmental regulator 2 (SKMC15 protein) [Source:UniProtKB/Swiss-Prot;Acc:Q12894]	-0.847089	-1.79887	6.21197e-07	-0.843322	-1.79418	0.000957169	-0.490862	-1.40528	0.00552909	-0.569601	-1.48411	0.00106299	-0.912198	-1.88191	5.68609e-09	-0.957104	-1.94141	1.36745e-10
209102_s_at	HBP1	RAR_RXR, STAF	HMG box-containing protein 1 (HMG box transcription factor 1)(High mobility group box transcription factor 1) [Source:UniProtKB/Swiss-Prot;Acc:O60381]	1.7584	3.38323	1.59851e-07	1.89662	3.7234	0.000100525	1.64911	3.13641	7.42248e-09	1.85198	3.60996	7.99373e-11	1.02861	2.04006	0.0167551	1.07187	2.10216	0.015879
209112_at	CDKN1B		Cyclin-dependent kinase inhibitor 1B (Cyclin-dependent kinase inhibitor p27)(p27Kip1) [Source:UniProtKB/Swiss-Prot;Acc:P46527]	0.649974	1.56914	0.00593338	0.58337	1.49835	0.0316173	0.675707	1.59738	1.10758e-06	0.734996	1.66439	5.17172e-07	0.624768	1.54196	0.000262429	0.645055	1.5638	0.000283178
209163_at	CYB561		Cytochrome b561 (Cytochrome b-561) [Source:UniProtKB/Swiss-Prot;Acc:P49447]	-0.480509	-1.39524	1.13702e-05	-0.516737	-1.43072	0.00137781	-0.449399	-1.36547	0.00123026	-0.500849	-1.41505	0.000424868	-0.854785	-1.80849	1.14986e-11	-0.877808	-1.83758	1.09008e-12
209164_s_at	CYB561		Cytochrome b561 (Cytochrome b-561) [Source:UniProtKB/Swiss-Prot;Acc:P49447]	-0.928926	-1.90386	1.41517e-07	-0.891077	-1.85456	0.000826472	-0.457229	-1.3729	0.0105427	-0.506754	-1.42085	0.00541113	-1.02103	-2.02937	3.15007e-11	-1.03991	-2.05609	7.14076e-12
209212_s_at	KLF5	OLF-1	Krueppel-like factor 5 (Intestinal-enriched krueppel-like factor)(Colon krueppel-like factor)(Transcription factor BTEB2)(Basic transcription element-binding protein 2)(BTE-binding protein 2)(GC-box-binding protein 2) [Source:UniProtKB/Swiss-Prot;Acc:Q13887]	0.777367	1.714	0.000982269	0.40508	1.32416	0.0366508	0.528706	1.44263	0.000383372	0.603344	1.51923	0.000100577	0.54877	1.46284	0.0109946	0.564811	1.47919	0.0117417
209233_at	EMG1		Probable ribosome biogenesis protein NEP1 (Nucleolar protein EMG1 homolog)(Protein C2f) [Source:UniProtKB/Swiss-Prot;Acc:Q92979]	-1.09123	-2.13056	4.82976e-09	-1.19569	-2.29054	1.02624e-06	-0.720333	-1.64756	6.69887e-07	-0.85027	-1.80284	3.60944e-11	-0.674534	-1.59608	0.000309328	-0.73889	-1.66889	3.20857e-05
209247_s_at	ABCF2	OLF-1, STAF	ATP-binding cassette sub-family F member 2 (Iron-inhibited ABC transporter 2) [Source:UniProtKB/Swiss-Prot;Acc:Q9UG63]	-1.00878	-2.01221	1.12407e-07	-1.22505	-2.33764	5.85298e-06	-0.597459	-1.51305	0.0033541	-0.673406	-1.59483	0.00134775	-0.736366	-1.66597	0.00104447	-0.765932	-1.70047	0.000968978
209271_at	BPTF		Nucleosome-remodeling factor subunit BPTF (Bromodomain and PHD finger-containing transcription factor)(Fetal Alzheimer antigen)(Fetal Alz-50 clone 1 protein) [Source:UniProtKB/Swiss-Prot;Acc:Q12830]	0.847671	1.79959	0.000398125	0.785705	1.72393	0.00014166	0.533899	1.44784	2.03921e-05	0.620307	1.5372	4.5516e-07	0.627534	1.54492	0.000169495	0.672282	1.59359	1.92848e-05
209323_at	PRKRIR		52 kDa repressor of the inhibitor of the protein kinase (p58IPK-interacting protein)(58 kDa interferon-induced protein kinase-interacting protein)(P52rIPK)(Death-associated protein 4)(THAP domain-containing protein 0) [Source:UniProtKB/Swiss-Prot;Acc:O43422]	-0.452149	-1.36808	6.17594e-05	-0.430345	-1.34756	3.76976e-05	-0.420901	-1.33876	4.70798e-05	-0.461658	-1.37712	1.25785e-05	-0.476912	-1.39176	0.000102992	-0.489182	-1.40365	9.66397e-05
209357_at	CITED2	PAX3, RXR_RAR	Cbp/p300-interacting transactivator 2 (MSG-related protein 1)(MRG-1)(P35srj) [Source:UniProtKB/Swiss-Prot;Acc:Q99967]	1.8475	3.59876	0.000290029	1.33854	2.52896	0.00646173	0.830002	1.77769	3.64512e-08	0.96234	1.94847	1.38759e-11	0.686021	1.60884	0.00121126	0.715526	1.64208	0.000647608
209398_at	HIST1H1C	PAX9	Histone H1.2 (Histone H1d) [Source:UniProtKB/Swiss-Prot;Acc:P16403]	1.27688	2.42315	2.60969e-09	1.17553	2.25875	2.87355e-05	0.481916	1.3966	0.00162747	0.589705	1.50494	2.28861e-05	0.625278	1.54251	0.000407322	0.686064	1.60889	3.43505e-05
209479_at	CCDC28A	STAF	Coiled-coil domain-containing protein 28A (CCRL1AP) [Source:UniProtKB/Swiss-Prot;Acc:Q8IWP9]	2.65691	6.30683	7.71513e-11	2.4261	5.3744	8.84697e-06	1.78956	3.4571	4.62644e-10	2.06314	4.17896	5.85606e-17	1.62374	3.08172	5.98408e-05	1.74974	3.36298	1.34649e-05
209531_at	GSTZ1		Maleylacetoacetate isomerase (MAAI)(EC 5.2.1.2)(Glutathione S-transferase zeta 1)(EC 2.5.1.18)(GSTZ1-1) [Source:UniProtKB/Swiss-Prot;Acc:O43708]	0.493763	1.40811	0.0106893	0.611866	1.52823	0.0172568	0.60964	1.52588	4.64623e-10	0.626094	1.54338	1.44327e-09	0.721848	1.64929	4.7807e-10	0.70968	1.63544	1.06897e-09
209577_at	PCYT2		Ethanolamine-phosphate cytidylyltransferase (EC 2.7.7.14)(Phosphorylethanolamine transferase)(CTP:phosphoethanolamine cytidylyltransferase) [Source:UniProtKB/Swiss-Prot;Acc:Q99447]	-1.16807	-2.24711	1.24885e-05	-1.06061	-2.08582	0.00377685	-0.611643	-1.528	0.00240535	-0.654308	-1.57386	0.000813334	-0.876996	-1.83655	2.01754e-05	-0.914897	-1.88543	5.74343e-06
209653_at	KPNA4		Importin subunit alpha-4 (Karyopherin subunit alpha-4)(Importin alpha Q1)(Qip1) [Source:UniProtKB/Swiss-Prot;Acc:O00629]	-0.646293	-1.56514	8.66003e-07	-0.61586	-1.53247	0.000140155	-0.657494	-1.57734	0.000193168	-0.756141	-1.68897	7.31667e-06	-0.856765	-1.81097	3.6536e-05	-0.924027	-1.8974	6.04427e-06
209682_at	CBLB		E3 ubiquitin-protein ligase CBL-B (EC 6.3.2.-)(Signal transduction protein CBL-B)(SH3-binding protein CBL-B)(Casitas B-lineage lymphoma proto-oncogene b)(RING finger protein 56) [Source:UniProtKB/Swiss-Prot;Acc:Q13191]	1.01344	2.01872	3.12367e-07	1.13955	2.20313	5.87161e-05	0.495739	1.41004	8.26352e-05	0.527603	1.44153	6.30292e-05	0.399937	1.31945	0.0309928	0.40852	1.32732	0.0356765
209761_s_at	SP110		Sp110 nuclear body protein (Transcriptional coactivator Sp110)(Speckled 110 kDa)(Interferon-induced protein 41/75) [Source:UniProtKB/Swiss-Prot;Acc:Q9HB58]	1.27091	2.41313	7.25592e-08	1.18171	2.26846	0.000155479	0.86942	1.82693	6.27653e-06	1.0377	2.05295	4.99898e-09	1.06124	2.08673	4.74343e-06	1.15502	2.22688	4.47799e-07
209762_x_at	SP110		Sp110 nuclear body protein (Transcriptional coactivator Sp110)(Speckled 110 kDa)(Interferon-induced protein 41/75) [Source:UniProtKB/Swiss-Prot;Acc:Q9HB58]	1.29072	2.4465	2.22893e-08	1.2454	2.37084	0.000180601	0.422476	1.34023	0.00228634	0.503111	1.41727	0.000140469	0.762312	1.69621	1.21734e-07	0.828333	1.77563	2.29637e-09
209803_s_at	PHLDA2	OLF-1	Pleckstrin homology-like domain family A member 2 (Imprinted in placenta and liver protein)(Tumor-suppressing subchromosomal transferable fragment candidate gene 3 protein)(Tumor-suppressing STF cDNA 3 protein)(Beckwith-Wiedemann syndrome chromosomal region 1 candidate gene C protein)(p17-Beckwith-Wiedemann region 1 C)(p17-BWR1C) [Source:UniProtKB/Swiss-Prot;Acc:Q53GA4]	-2.93267	-7.63523	1.01195e-07	-3.16446	-8.96594	3.91867e-06	-2.95662	-7.76303	7.55253e-06	-3.53288	-11.5745	4.62779e-09	-3.90333	-14.963	2.19244e-08	-4.23199	-18.7912	2.45551e-11
209815_at	PTCH1		Protein patched homolog 1 (PTC1)(PTC) [Source:UniProtKB/Swiss-Prot;Acc:Q13635]	0.81993	1.76532	8.13728e-12	0.855659	1.80959	2.62535e-06	0.43055	1.34775	0.0168067	0.58862	1.50381	0.000115558	0.717021	1.64378	0.00148534	0.859235	1.81408	6.43833e-06
209825_s_at	UCK2		Uridine-cytidine kinase 2 (UCK 2)(EC 2.7.1.48)(Uridine monophosphokinase 2)(Cytidine monophosphokinase 2) [Source:UniProtKB/Swiss-Prot;Acc:Q9BZX2]	-1.13401	-2.19468	2.83949e-07	-1.16815	-2.24723	8.97552e-05	-0.849711	-1.80214	7.77894e-07	-1.03764	-2.05287	1.77182e-15	-0.741705	-1.67215	0.0016551	-0.851449	-1.80431	7.94947e-05
209833_at	CRADD		Death domain-containing protein CRADD (Caspase and RIP adapter with death domain)(RIP-associated protein with a death domain) [Source:UniProtKB/Swiss-Prot;Acc:P78560]	0.787514	1.7261	1.67567e-10	0.81986	1.76523	1.27012e-07	0.46284	1.37825	0.00054734	0.48309	1.39773	0.000999356	0.651932	1.57127	4.98926e-06	0.659758	1.57982	7.96702e-06
209836_x_at	BOLA2B		BolA-like protein 2 [Source:UniProtKB/Swiss-Prot;Acc:Q9H3K6]	-0.779114	-1.71608	0.000294797	-0.861333	-1.81672	0.000181362	-0.469582	-1.38471	0.0107187	-0.639854	-1.55817	1.43598e-05	-0.843655	-1.79459	4.77048e-07	-0.938158	-1.91608	5.074e-13
209852_x_at	PSME3	PAX3	Proteasome activator complex subunit 3 (Proteasome activator 28 subunit gamma)(PA28gamma)(PA28g)(Activator of multicatalytic protease subunit 3)(11S regulator complex subunit gamma)(REG-gamma)(Ki nuclear autoantigen) [Source:UniProtKB/Swiss-Prot;Acc:P61289]	-0.425224	-1.34278	0.000145047	-0.543504	-1.45751	6.68639e-05	-0.618544	-1.53532	1.3378e-08	-0.657811	-1.57769	4.62779e-09	-0.649793	-1.56894	1.40462e-06	-0.655321	-1.57497	1.61159e-06
209853_s_at	PSME3	PAX3	Proteasome activator complex subunit 3 (Proteasome activator 28 subunit gamma)(PA28gamma)(PA28g)(Activator of multicatalytic protease subunit 3)(11S regulator complex subunit gamma)(REG-gamma)(Ki nuclear autoantigen) [Source:UniProtKB/Swiss-Prot;Acc:P61289]	-1.00427	-2.00593	7.42914e-09	-1.17218	-2.25352	7.56313e-07	-1.00621	-2.00862	9.1825e-06	-1.14905	-2.21767	2.91544e-06	-1.37318	-2.5904	3.18336e-09	-1.42368	-2.68269	3.16657e-09
209911_x_at	HIST1H2BD		Histone H2B type 1-D (H2B.b)(H2B/b)(H2B.1 B)(HIRA-interacting protein 2) [Source:UniProtKB/Swiss-Prot;Acc:P58876]	1.43016	2.69478	3.27305e-08	1.63321	3.10203	2.57846e-06	0.689612	1.61285	0.0131518	0.98959	1.98562	2.1917e-08	1.05941	2.08408	0.000657464	1.21992	2.32934	1.3301e-08
210117_at	SPAG1		Sperm-associated antigen 1 (Infertility-related sperm protein Spag-1)(HSD-3.8) [Source:UniProtKB/Swiss-Prot;Acc:Q07617]	-1.6958	-3.23956	7.08609e-07	-1.44455	-2.72178	3.46754e-05	-1.0413	-2.05808	7.36095e-07	-1.17774	-2.26222	1.76774e-07	-1.00461	-2.00639	0.000531964	-1.05102	-2.07199	0.000425541
210137_s_at	DCTD		Deoxycytidylate deaminase (EC 3.5.4.12)(dCMP deaminase) [Source:UniProtKB/Swiss-Prot;Acc:P32321]	-0.704404	-1.62947	0.000191799	-0.747503	-1.67888	0.0109563	-0.751224	-1.68322	0.00701238	-0.944548	-1.92459	0.000373502	-1.54846	-2.92504	5.15073e-10	-1.65702	-3.15364	1.9977e-13
210337_s_at	ACLY		ATP-citrate synthase (EC 2.3.3.8)(ATP-citrate (pro-S-)-lyase)(Citrate cleavage enzyme) [Source:UniProtKB/Swiss-Prot;Acc:P53396]	-1.01244	-2.01733	2.49082e-08	-1.02776	-2.03886	1.67764e-05	-0.741007	-1.67134	1.92717e-05	-0.797088	-1.73759	7.19651e-06	-0.828959	-1.7764	3.2233e-05	-0.855262	-1.80909	2.03198e-05
210544_s_at	ALDH3A2		Fatty aldehyde dehydrogenase (EC 1.2.1.3)(Aldehyde dehydrogenase family 3 member A2)(Aldehyde dehydrogenase 10)(Microsomal aldehyde dehydrogenase) [Source:UniProtKB/Swiss-Prot;Acc:P51648]	0.438023	1.35475	0.00228071	0.607109	1.5232	0.0013066	0.466643	1.38189	0.000130125	0.537265	1.45122	1.3023e-05	0.559694	1.47396	0.000157414	0.574784	1.48945	7.33952e-05
210571_s_at	CMAH		cytidine monophosphate-N-acetylneuraminic acid hydroxylase (CMP-N-acetylneuraminate monooxygenase) pseudogene (CMAH), transcript variant 1, non-coding RNA [Source:RefSeq DNA;Acc:NR_002174]	1.06425	2.09109	8.1026e-08	0.941922	1.92109	0.00109563	1.00895	2.01245	0.00100555	1.29353	2.45127	2.25238e-06	1.45321	2.73816	4.07002e-06	1.59604	3.02313	1.18441e-08
210574_s_at	NUDC	PAX3	Nuclear migration protein nudC (Nuclear distribution protein C homolog) [Source:UniProtKB/Swiss-Prot;Acc:Q9Y266]	-0.521399	-1.43535	0.00129632	-0.757096	-1.69008	0.000203147	-0.49596	-1.41026	0.000104407	-0.593381	-1.50878	1.56849e-06	-0.610209	-1.52648	6.80776e-06	-0.673755	-1.59522	2.92445e-07
210612_s_at	SYNJ2		Synaptojanin-2 (EC 3.1.3.36)(Synaptic inositol-1,4,5-trisphosphate 5-phosphatase 2) [Source:UniProtKB/Swiss-Prot;Acc:O15056]	0.594421	1.50987	0.000238383	0.743836	1.67462	6.58244e-05	0.575166	1.48985	0.000100092	0.73852	1.66846	4.46361e-08	0.653256	1.57271	0.00410465	0.719159	1.64622	0.000545995
210685_s_at	UBE4B	AhR/Arnt, OLF-1, RAR_RXR	Ubiquitin conjugation factor E4 B (Ubiquitin fusion degradation protein 2)(Homozygously deleted in neuroblastoma 1) [Source:UniProtKB/Swiss-Prot;Acc:O95155]	0.649069	1.56816	6.91892e-08	0.583902	1.4989	0.000162357	0.610346	1.52663	0.000229836	0.71331	1.63956	3.07263e-05	0.989217	1.98511	8.44735e-08	1.0516	2.07282	5.68699e-09
210761_s_at	GRB7		Growth factor receptor-bound protein 7 (GRB7 adapter protein)(Epidermal growth factor receptor GRB-7)(B47) [Source:UniProtKB/Swiss-Prot;Acc:Q14451]	1.54356	2.91513	0.00029178	1.68737	3.22068	0.00715182	1.41961	2.67513	8.12386e-07	1.63772	3.11174	6.63784e-10	1.21671	2.32417	0.00231831	1.3072	2.4746	0.00070166
210827_s_at	ELF3		ETS-related transcription factor Elf-3 (E74-like factor 3)(Epithelium-specific Ets transcription factor 1)(ESE-1)(Epithelium-restricted Ets protein ESX)(Epithelial-restricted with serine box) [Source:UniProtKB/Swiss-Prot;Acc:P78545]	0.744396	1.67527	1.82039e-05	0.608476	1.52465	0.0153447	0.574489	1.48915	0.00477503	0.795292	1.73543	4.2093e-08	1.0125	2.01741	3.47023e-05	1.14697	2.21448	8.96931e-10
210966_x_at	LARP1		La-related protein 1 (La ribonucleoprotein domain family member 1) [Source:UniProtKB/Swiss-Prot;Acc:Q6PKG0]	-0.463147	-1.37855	0.0254254	-0.491227	-1.40564	0.00223361	-0.401757	-1.32112	1.68093e-05	-0.422041	-1.33982	3.57833e-06	-0.403484	-1.3227	0.00101929	-0.411758	-1.33031	0.000600156
211015_s_at	HSPA4	OLF-1, RAR_RXR	Heat shock 70 kDa protein 4 (Heat shock 70-related protein APG-2)(HSP70RY) [Source:UniProtKB/Swiss-Prot;Acc:P34932]	-0.992978	-1.99029	2.1321e-08	-1.05355	-2.07563	5.25173e-06	-0.627652	-1.54505	1.94531e-06	-0.727341	-1.65558	1.58202e-08	-0.789167	-1.72808	1.08784e-07	-0.841688	-1.79215	1.50314e-09
211016_x_at	HSPA4	OLF-1, RAR_RXR	Heat shock 70 kDa protein 4 (Heat shock 70-related protein APG-2)(HSP70RY) [Source:UniProtKB/Swiss-Prot;Acc:P34932]	-0.966606	-1.95424	1.31038e-07	-0.990296	-1.98659	0.000169949	-0.919635	-1.89164	0.000186394	-1.06734	-2.09557	2.35106e-05	-1.23689	-2.3569	3.62189e-06	-1.34993	-2.54899	4.85793e-07
211068_x_at	FAM21A		Protein FAM21A [Source:UniProtKB/Swiss-Prot;Acc:Q641Q2]	1.07774	2.11073	5.50181e-08	1.05259	2.07426	0.000210679	0.503159	1.41731	0.00520348	0.656742	1.57652	1.26968e-05	0.927093	1.90144	9.57897e-07	1.03875	2.05445	1.23269e-11
211284_s_at	GRN		Granulins Precursor (Proepithelin)(PEPI) [Contains Acrogranin;Paragranulin;Granulin-1(Granulin G);Granulin-2(Granulin F);Granulin-3(Granulin B);Granulin-4(Granulin A);Granulin-5(Granulin C);Granulin-6(Granulin D);Granulin-7(Granulin E)] [Source:UniProtKB/Swiss-Prot;Acc:P28799]	0.59067	1.50595	0.00166438	0.672243	1.59355	0.0001706	0.567355	1.4818	0.00545546	0.764868	1.69921	1.58787e-07	0.673852	1.59533	0.00230586	0.817432	1.76227	2.05077e-06
211297_s_at	CDK7		Cell division protein kinase 7 (EC 2.7.11.22)(EC 2.7.11.23)(CDK-activating kinase)(CAK)(CAK1)(TFIIH basal transcription factor complex kinase subunit)(39 kDa protein kinase)(P39 Mo15)(STK1) [Source:UniProtKB/Swiss-Prot;Acc:P50613]	0.782446	1.72004	2.53387e-05	0.720953	1.64827	0.00110351	0.93128	1.90697	2.1961e-12	0.889229	1.85219	2.25012e-12	0.77313	1.70897	4.66359e-05	0.730224	1.6589	5.49772e-05
211355_x_at	LEPR		Leptin receptor Precursor (LEP-R)(OB receptor)(OB-R)(HuB219)(CD295 antigen) [Source:UniProtKB/Swiss-Prot;Acc:P48357]	1.01914	2.02671	6.7275e-05	0.932492	1.90857	0.0155221	0.486598	1.40114	0.000537384	0.491299	1.40571	0.000781012	0.607622	1.52375	4.84631e-05	0.606482	1.52254	4.13685e-05
211356_x_at	LEPR		Leptin receptor Precursor (LEP-R)(OB receptor)(OB-R)(HuB219)(CD295 antigen) [Source:UniProtKB/Swiss-Prot;Acc:P48357]	0.984791	1.97903	5.10115e-05	0.814959	1.75925	0.0232999	0.469594	1.38472	0.00191451	0.464426	1.37977	0.00360057	0.533948	1.44789	0.00153047	0.522119	1.43606	0.00209596
211450_s_at	MSH6		DNA mismatch repair protein Msh6 (MutS-alpha 160 kDa subunit)(G/T mismatch-binding protein)(GTMBP)(GTBP)(p160) [Source:UniProtKB/Swiss-Prot;Acc:P52701]	-0.79359	-1.73338	2.71983e-05	-0.828617	-1.77598	0.000512911	-0.972822	-1.96268	0.00294311	-1.11591	-2.16732	0.0006858	-0.931498	-1.90726	0.0238744	-0.962171	-1.94824	0.0192449
211458_s_at	GABARAPL3		Gamma-aminobutyric acid receptor-associated protein-like 1 (GABA(A) receptor-associated protein-like 1)(Glandular epithelial cell protein 1)(GEC-1)(Early estrogen-regulated protein) [Source:UniProtKB/Swiss-Prot;Acc:Q9H0R8]	2.11791	4.34065	9.04495e-15	1.92711	3.80294	3.74561e-07	0.864665	1.82092	0.000189803	0.987962	1.98338	1.58178e-05	0.934334	1.91101	0.000354965	0.970971	1.96016	0.000151793
211559_s_at	CCNG2		Cyclin-G2 [Source:UniProtKB/Swiss-Prot;Acc:Q16589]	1.34451	2.53945	0.000529538	1.28264	2.43284	0.00847377	1.84955	3.60387	7.42248e-09	2.13798	4.40146	6.08056e-15	1.38072	2.60398	0.00190439	1.48746	2.80395	0.000890443
211576_s_at	SLC19A1		Folate transporter 1 (FOLT)(Reduced folate carrier protein)(RFC)(Intestinal folate carrier)(IFC-1)(Placental folate transporter)(Solute carrier family 19 member 1) [Source:UniProtKB/Swiss-Prot;Acc:P41440]	-0.866383	-1.82309	3.47584e-06	-0.764192	-1.69842	0.00254537	-0.666911	-1.58767	0.00065416	-0.686573	-1.60946	0.000251292	-0.74502	-1.676	0.000813917	-0.70839	-1.63398	0.00154874
211671_s_at	NR3C1	AhR/Arnt, PAX3	Glucocorticoid receptor (GR)(Nuclear receptor subfamily 3 group C member 1) [Source:UniProtKB/Swiss-Prot;Acc:P04150]	1.69132	3.22952	1.81957e-05	1.35363	2.55554	0.000301463	0.947625	1.9287	4.47492e-06	1.05027	2.07092	1.14565e-06	1.25316	2.38363	6.72663e-07	1.27025	2.41204	8.61185e-07
211686_s_at	MAK16		Protein MAK16 homolog (Protein RBM13)(NNP78) [Source:UniProtKB/Swiss-Prot;Acc:Q9BXY0]	-0.539228	-1.45319	0.000206935	-0.511009	-1.42505	0.00361767	-0.791245	-1.73057	2.00241e-06	-0.93359	-1.91002	2.71851e-10	-0.731707	-1.6606	0.000744863	-0.796943	-1.73742	7.34946e-05
211725_s_at	BID		BH3-interacting domain death agonist (p22 BID)(BID) [Contains BH3-interacting domain death agonist p15(p15 BID);BH3-interacting domain death agonist p13(p13 BID);BH3-interacting domain death agonist p11(p11 BID)] [Source:UniProtKB/Swiss-Prot;Acc:P55957]	-0.709594	-1.63534	0.00478785	-0.759326	-1.6927	0.0261478	-0.976851	-1.96817	2.68927e-06	-1.06498	-2.09214	4.70307e-07	-1.38918	-2.6193	4.39423e-12	-1.4276	-2.68999	6.75071e-13
211769_x_at	SERINC3		Serine incorporator 3 (Tumor differentially expressed protein 1) [Source:UniProtKB/Swiss-Prot;Acc:Q13530]	0.618911	1.53572	0.00144964	0.664684	1.58522	0.022844	0.416157	1.33437	1.51902e-05	0.465964	1.38124	1.4219e-06	0.462699	1.37812	2.14176e-05	0.478471	1.39327	1.25306e-05
211812_s_at	B3GALNT1		UDP-GalNAc:beta-1,3-N-acetylgalactosaminyltransferase 1 (EC 2.4.1.79)(Beta-3-GalNAc-T1)(Beta-1,3-galactosyltransferase 3)(Beta-1,3-GalTase 3)(Beta3Gal-T3)(b3Gal-T3)(Beta-3-Gx-T3)(Galactosylgalactosylglucosylceramide beta-D-acetyl-galactosaminyltransferase)(UDP-N-acetylgalactosamine:globotriaosylceramide beta-1,3-N-acetylgalactosaminyltransferase)(Globoside synthase) [Source:UniProtKB/Swiss-Prot;A…	-1.19652	-2.29186	3.47713e-05	-1.05123	-2.07229	0.00640277	-0.723519	-1.6512	0.00173253	-0.833597	-1.78212	0.00012698	-0.666153	-1.58684	0.036789	-0.776292	-1.71272	0.0109696
211874_s_at	MYST4		Histone acetyltransferase MYST4 (MYST protein 4)(EC 2.3.1.48)(EC 2.3.1.-)(MOZ, YBF2/SAS3, SAS2 and TIP60 protein 4)(Histone acetyltransferase MOZ2)(Monocytic leukemia zinc finger protein-related factor)(Histone acetyltransferase MORF) [Source:UniProtKB/Swiss-Prot;Acc:Q8WYB5]	0.645036	1.56378	0.000843301	0.731772	1.66068	0.000281343	1.12598	2.1825	3.44694e-05	1.30098	2.46397	4.5516e-07	1.20174	2.30016	0.000644611	1.30668	2.47372	0.000147713
211937_at	EIF4B		Eukaryotic translation initiation factor 4B (eIF-4B) [Source:UniProtKB/Swiss-Prot;Acc:P23588]	0.750339	1.68219	3.5928e-05	0.903529	1.87064	4.13659e-06	0.460946	1.37644	5.76211e-05	0.534499	1.44844	8.96569e-07	0.426061	1.34356	0.00190439	0.458941	1.37453	0.000721087
211938_at	EIF4B		Eukaryotic translation initiation factor 4B (eIF-4B) [Source:UniProtKB/Swiss-Prot;Acc:P23588]	0.505259	1.41938	0.000913558	0.647095	1.56601	8.98223e-05	0.40211	1.32144	0.000539223	0.50358	1.41773	4.12424e-07	0.598844	1.5145	4.46049e-07	0.649835	1.56899	9.10915e-11
211949_s_at	NOLC1		Nucleolar phosphoprotein p130 (Nucleolar 130 kDa protein)(140 kDa nucleolar phosphoprotein)(Nopp140)(Nucleolar and coiled-body phosphoprotein 1)(HCV NS5A trans-regulated protein 13)(NS5ATP13) [Source:UniProtKB/Swiss-Prot;Acc:Q14978]	-0.485602	-1.40017	0.0081011	-0.648052	-1.56705	0.00540178	-0.759501	-1.6929	2.24972e-06	-0.882498	-1.84356	3.41935e-08	-0.808563	-1.75147	7.89967e-05	-0.883309	-1.8446	1.01874e-05
211951_at	NOLC1		Nucleolar phosphoprotein p130 (Nucleolar 130 kDa protein)(140 kDa nucleolar phosphoprotein)(Nopp140)(Nucleolar and coiled-body phosphoprotein 1)(HCV NS5A trans-regulated protein 13)(NS5ATP13) [Source:UniProtKB/Swiss-Prot;Acc:Q14978]	-0.448593	-1.36471	4.18022e-05	-0.450984	-1.36697	0.00389753	-0.678372	-1.60033	1.20964e-05	-0.791662	-1.73107	2.29396e-08	-0.967388	-1.9553	1.53702e-09	-1.02001	-2.02794	1.58796e-12
211986_at	AHNAK		Neuroblast differentiation-associated protein AHNAK (Desmoyokin) [Source:UniProtKB/Swiss-Prot;Acc:Q09666]	0.937063	1.91463	3.43991e-06	0.941509	1.92054	1.24274e-05	0.502241	1.41641	0.000932346	0.646198	1.56504	1.05875e-06	0.855004	1.80876	9.58761e-08	0.926872	1.90115	5.34842e-12
212009_s_at	AP005668.1		Stress-induced-phosphoprotein 1 (STI1)(Hsc70/Hsp90-organizing protein)(Hop)(Transformation-sensitive protein IEF SSP 3521)(NY-REN-11 antigen) [Source:UniProtKB/Swiss-Prot;Acc:P31948]	-1.94466	-3.84947	3.52826e-10	-2.07415	-4.21095	4.97771e-06	-0.919436	-1.89138	0.00526171	-0.969752	-1.9585	0.00280431	-0.995803	-1.99419	0.0158853	-0.997496	-1.99653	0.0145152
212076_at	MLL	AhR/Arnt, OLF-1	Histone-lysine N-methyltransferase HRX (EC 2.1.1.43)(Zinc finger protein HRX)(ALL-1)(Trithorax-like protein)(Lysine N-methyltransferase 2A)(CXXC-type zinc finger protein 7) [Source:UniProtKB/Swiss-Prot;Acc:Q03164]	0.941962	1.92114	0.000907102	0.734516	1.66384	0.0130247	0.588592	1.50378	0.0215137	0.768766	1.70381	0.000625711	0.805317	1.74753	0.0219057	0.929696	1.90487	0.00444015
212080_at	MLL	AhR/Arnt, OLF-1	Histone-lysine N-methyltransferase HRX (EC 2.1.1.43)(Zinc finger protein HRX)(ALL-1)(Trithorax-like protein)(Lysine N-methyltransferase 2A)(CXXC-type zinc finger protein 7) [Source:UniProtKB/Swiss-Prot;Acc:Q03164]	1.05227	2.07379	0.000298135	0.943748	1.92352	0.00681916	0.768958	1.70404	0.00103578	0.88301	1.84422	1.46537e-05	0.759854	1.69332	0.020837	0.832928	1.7813	0.00476403
212110_at	SLC39A14		Zinc transporter ZIP14 Precursor (Zrt- and Irt-like protein 14)(ZIP-14)(Solute carrier family 39 member 14)(LIV-1 subfamily of ZIP zinc transporter 4)(LZT-Hs4) [Source:UniProtKB/Swiss-Prot;Acc:Q15043]	-1.25746	-2.39074	4.18527e-08	-1.02223	-2.03105	0.00149319	-0.998968	-1.99857	4.98049e-05	-1.16108	-2.23624	7.846e-07	-1.49613	-2.82084	6.24874e-09	-1.65024	-3.13885	2.50012e-11
212117_at	RHOQ	RAR_RXR, STAF	Rho-related GTP-binding protein RhoQ Precursor (Ras-related GTP-binding protein TC10)(Ras-like protein family member 7A) [Source:UniProtKB/Swiss-Prot;Acc:P17081]	-0.582033	-1.49696	1.12982e-05	-0.506164	-1.42027	0.000958079	-0.619918	-1.53679	0.00511251	-0.655712	-1.57539	0.00638761	-1.11187	-2.16126	5.2255e-07	-1.14531	-2.21194	2.8723e-07
212136_at	ATP2B4		Plasma membrane calcium-transporting ATPase 4 (PMCA4)(EC 3.6.3.8)(Plasma membrane calcium ATPase isoform 4)(Plasma membrane calcium pump isoform 4)(Matrix-remodeling-associated protein 1) [Source:UniProtKB/Swiss-Prot;Acc:P23634]	0.606249	1.5223	0.00236341	0.491804	1.4062	0.0212782	0.700592	1.62517	0.000997092	0.806698	1.7492	0.000205414	1.30148	2.46481	1.11688e-11	1.38963	2.62011	1.29756e-13
212220_at	PSME4		Proteasome activator complex subunit 4 (Proteasome activator PA200) [Source:UniProtKB/Swiss-Prot;Acc:Q14997]	-0.55512	-1.46929	0.0116396	-0.658857	-1.57883	0.00813922	-1.16886	-2.24833	9.63338e-05	-1.25597	-2.38827	5.28472e-05	-1.40307	-2.64464	1.43237e-05	-1.4285	-2.69166	1.44752e-05
212247_at	NUP205		Nuclear pore complex protein Nup205 (Nucleoporin Nup205)(205 kDa nucleoporin) [Source:UniProtKB/Swiss-Prot;Acc:Q92621]	-0.449697	-1.36575	0.0048967	-0.486081	-1.40063	0.00155265	-0.450111	-1.36615	0.0105427	-0.632721	-1.55049	7.7499e-07	-0.613649	-1.53012	0.00134442	-0.727816	-1.65613	5.97518e-07
212288_at	FNBP1	PAX3	Formin-binding protein 1 (Formin-binding protein 17)(hFBP17) [Source:UniProtKB/Swiss-Prot;Acc:Q96RU3]	0.641338	1.55977	0.00851784	0.627004	1.54435	0.0190108	0.527979	1.44191	7.23183e-05	0.63812	1.5563	4.95071e-07	0.814575	1.75878	1.92586e-09	0.859207	1.81404	1.87273e-11
212335_at	GNS		N-acetylglucosamine-6-sulfatase Precursor (G6S)(Glucosamine-6-sulfatase)(EC 3.1.6.14) [Source:UniProtKB/Swiss-Prot;Acc:P15586]	0.734876	1.66425	0.00378461	0.646739	1.56563	0.0364137	0.462956	1.37836	0.000896559	0.615938	1.53255	4.58207e-10	0.494166	1.40851	0.00329766	0.579768	1.49461	9.59126e-06
212370_x_at	FAM21A		Protein FAM21A [Source:UniProtKB/Swiss-Prot;Acc:Q641Q2]	0.99712	1.99601	1.67042e-08	0.94181	1.92094	0.000116312	0.496768	1.41105	0.00405008	0.644563	1.56327	7.81885e-06	0.889784	1.8529	2.81879e-06	0.994029	1.99174	4.50713e-10
212406_s_at	PCMTD2		Protein-L-isoaspartate O-methyltransferase domain-containing protein 2 [Source:UniProtKB/Swiss-Prot;Acc:Q9NV79]	1.22896	2.34398	3.37825e-05	1.37023	2.58512	0.0013026	0.745579	1.67665	4.69115e-05	0.893265	1.85737	3.88007e-08	0.916849	1.88799	5.96587e-06	0.994885	1.99292	4.88451e-08
212408_at	TOR1AIP1	PAX3	Torsin-1A-interacting protein 1 [Source:UniProtKB/Swiss-Prot;Acc:Q5JTV8]	1.16771	2.24654	2.05013e-08	0.973695	1.96386	0.000351634	0.407595	1.32647	2.02811e-05	0.457337	1.373	1.3963e-06	0.460872	1.37637	3.48823e-05	0.484606	1.3992	8.41186e-06
212452_x_at	MYST4		Histone acetyltransferase MYST4 (MYST protein 4)(EC 2.3.1.48)(EC 2.3.1.-)(MOZ, YBF2/SAS3, SAS2 and TIP60 protein 4)(Histone acetyltransferase MOZ2)(Monocytic leukemia zinc finger protein-related factor)(Histone acetyltransferase MORF) [Source:UniProtKB/Swiss-Prot;Acc:Q8WYB5]	0.699193	1.6236	0.000263847	0.752862	1.68513	0.000180601	1.13215	2.19186	8.96245e-05	1.32141	2.4991	1.67374e-06	1.25128	2.38052	0.00070167	1.36337	2.57286	0.000121952
212458_at	SPRED2		Sprouty-related, EVH1 domain-containing protein 2 (Spred-2) [Source:UniProtKB/Swiss-Prot;Acc:Q7Z698]	-1.10562	-2.15191	0.000561817	-1.08117	-2.11575	0.0235809	-1.49837	-2.82523	1.32235e-06	-1.6545	-3.14815	3.02036e-07	-1.71539	-3.28385	7.92633e-05	-1.81452	-3.51742	5.96312e-05
212462_at	MYST4		Histone acetyltransferase MYST4 (MYST protein 4)(EC 2.3.1.48)(EC 2.3.1.-)(MOZ, YBF2/SAS3, SAS2 and TIP60 protein 4)(Histone acetyltransferase MOZ2)(Monocytic leukemia zinc finger protein-related factor)(Histone acetyltransferase MORF) [Source:UniProtKB/Swiss-Prot;Acc:Q8WYB5]	0.500376	1.41458	0.00100689	0.517703	1.43167	0.013508	1.15867	2.23252	2.56697e-08	1.3466	2.54312	1.77182e-15	1.20894	2.31168	3.54196e-05	1.31446	2.48708	1.11772e-06
212514_x_at	DDX3X	OLF-1	ATP-dependent RNA helicase DDX3X (EC 3.6.1.-)(DEAD box protein 3, X-chromosomal)(Helicase-like protein 2)(HLP2)(DEAD box, X isoform) [Source:UniProtKB/Swiss-Prot;Acc:O00571]	-0.861254	-1.81662	3.61418e-09	-0.902817	-1.86971	2.15116e-05	-0.588587	-1.50377	1.86064e-06	-0.623891	-1.54103	1.34495e-06	-0.540502	-1.45448	0.00148016	-0.551333	-1.46544	0.00158588
212515_s_at	DDX3X	OLF-1	ATP-dependent RNA helicase DDX3X (EC 3.6.1.-)(DEAD box protein 3, X-chromosomal)(Helicase-like protein 2)(HLP2)(DEAD box, X isoform) [Source:UniProtKB/Swiss-Prot;Acc:O00571]	-0.580391	-1.49525	6.89071e-07	-0.639694	-1.558	4.42129e-06	-0.59208	-1.50742	4.92797e-08	-0.622843	-1.53991	4.51308e-08	-0.539967	-1.45394	0.000368255	-0.548261	-1.46232	0.000427309
212527_at	PPPDE2		PPPDE peptidase domain-containing protein 2 (Protein FAM152B) [Source:UniProtKB/Swiss-Prot;Acc:Q6ICB0]	-0.660609	-1.58075	0.0115511	-0.922079	-1.89484	0.00113595	-0.508572	-1.42264	0.000185494	-0.633907	-1.55176	8.81503e-07	-0.728704	-1.65715	2.02887e-06	-0.826254	-1.77308	1.16682e-08
212532_s_at	LSM12	PAX9	Protein LSM12 homolog [Source:UniProtKB/Swiss-Prot;Acc:Q3MHD2]	-0.811987	-1.75563	3.02236e-08	-0.825874	-1.77261	1.24274e-05	-0.662914	-1.58328	8.96218e-09	-0.684604	-1.60726	1.01366e-08	-0.66856	-1.58949	1.95039e-05	-0.699327	-1.62375	1.71043e-05
212534_at	ZNF24	AhR/Arnt, PAX3, STAF	Zinc finger protein 24 (Zinc finger protein 191)(Zinc finger protein KOX17)(Retinoic acid suppression protein A)(RSG-A)(Zinc finger and SCAN domain-containing protein 3) [Source:UniProtKB/Swiss-Prot;Acc:P17028]	0.626347	1.54365	0.00643355	0.788187	1.7269	0.0155548	0.536384	1.45033	3.14712e-05	0.646412	1.56527	9.38375e-08	0.546774	1.46082	0.00177249	0.603127	1.51901	0.000310498
212544_at	ZNHIT3		Zinc finger HIT domain-containing protein 3 (Thyroid receptor-interacting protein 3)(TRIP-3)(Thyroid hormone receptor interactor 3)(HNF-4a coactivator) [Source:UniProtKB/Swiss-Prot;Acc:Q15649]	0.60363	1.51953	8.28311e-06	0.661617	1.58186	0.00117392	0.461945	1.3774	4.57151e-06	0.498289	1.41254	2.60112e-06	0.410657	1.32929	0.00173525	0.422668	1.3404	0.00185968
212563_at	AC145291.1		KM-PA-2 protein [Source:UniProtKB/TrEMBL;Acc:Q96Q25]	-0.695457	-1.6194	0.00380846	-0.789231	-1.72815	0.0339315	-0.726371	-1.65447	0.0150386	-0.92243	-1.8953	0.000986707	-1.37559	-2.59474	1.57671e-07	-1.49076	-2.81037	3.91185e-10
212590_at	RRAS2		Ras-related protein R-Ras2 Precursor (Ras-like protein TC21)(Teratocarcinoma oncogene) [Source:UniProtKB/Swiss-Prot;Acc:P62070]	-0.402187	-1.32151	0.0227141	-0.502683	-1.41685	0.00601346	-0.536139	-1.45009	0.000964725	-0.599363	-1.51505	0.000310576	-0.94991	-1.93175	6.82258e-11	-0.97126	-1.96055	8.82525e-12
212593_s_at	PDCD4		Programmed cell death protein 4 (Nuclear antigen H731-like)(Neoplastic transformation inhibitor protein)(Protein 197/15a) [Source:UniProtKB/Swiss-Prot;Acc:Q53EL6]	0.765207	1.69961	2.38122e-05	0.74953	1.68124	0.00161433	0.489338	1.4038	0.00305502	0.627169	1.54453	3.62356e-06	0.634424	1.55232	0.00017753	0.724081	1.65185	4.89052e-07
212611_at	DTX4		Protein deltex-4 (Deltex4)(RING finger protein 155) [Source:UniProtKB/Swiss-Prot;Acc:Q9Y2E6]	-1.46078	-2.75258	0.000589705	-1.60686	-3.04588	0.0165741	-0.619913	-1.53678	5.74986e-06	-0.701672	-1.62639	2.00891e-06	-0.791783	-1.73121	3.00345e-06	-0.816342	-1.76094	1.12979e-05
212614_at	ARID5B		AT-rich interactive domain-containing protein 5B (ARID domain-containing protein 5B)(Mrf1-like)(Modulator recognition factor 2)(MRF-2) [Source:UniProtKB/Swiss-Prot;Acc:Q14865]	0.722099	1.64958	1.57797e-05	0.637975	1.55614	9.15337e-05	0.808729	1.75167	0.022196	1.05001	2.07054	0.00101547	1.45366	2.73901	6.88996e-06	1.56735	2.9636	8.71511e-08
212631_at	STX7		Syntaxin-7 [Source:UniProtKB/Swiss-Prot;Acc:O15400]	0.866616	1.82338	4.84158e-07	0.957129	1.94144	2.85746e-05	0.869137	1.82657	1.65386e-06	0.943439	1.92311	5.17172e-07	0.768941	1.70402	0.00108874	0.803348	1.74515	0.000893098
212632_at	STX7		Syntaxin-7 [Source:UniProtKB/Swiss-Prot;Acc:O15400]	0.862276	1.8179	3.56444e-06	0.952113	1.9347	2.19071e-05	0.825931	1.77268	2.85583e-07	0.912187	1.8819	1.62851e-08	0.722644	1.6502	0.00417175	0.750821	1.68275	0.00320568
212675_s_at	CEP68		Centrosomal protein of 68 kDa (Cep68) [Source:UniProtKB/Swiss-Prot;Acc:Q76N32]	0.88565	1.8476	4.74106e-06	1.07187	2.10216	7.30533e-05	0.681898	1.60425	0.00957984	0.904665	1.87211	2.12319e-05	1.13739	2.19982	2.08123e-05	1.25548	2.38746	3.14369e-09
212677_s_at	CEP68		Centrosomal protein of 68 kDa (Cep68) [Source:UniProtKB/Swiss-Prot;Acc:Q76N32]	0.864337	1.8205	2.45163e-06	0.962045	1.94807	3.81313e-05	0.50287	1.41703	0.0347411	0.724855	1.65273	7.342e-05	1.1098	2.15816	5.96587e-06	1.23312	2.35075	2.18807e-11
212680_x_at	ELF2		ETS-related transcription factor Elf-2 (E74-like factor 2)(New ETS-related factor) [Source:UniProtKB/Swiss-Prot;Acc:Q15723]	-0.612793	-1.52922	9.31729e-05	-0.535429	-1.44937	0.00264782	-0.482719	-1.39738	8.96372e-05	-0.545995	-1.46003	6.36186e-06	-0.78498	-1.72307	4.05317e-12	-0.818311	-1.76334	1.29461e-14
212697_at	FAM134C	OLF-1	Protein FAM134C [Source:UniProtKB/Swiss-Prot;Acc:Q86VR2]	0.984286	1.97833	1.71903e-10	1.05695	2.08053	2.39849e-06	0.70942	1.63515	1.86745e-09	0.806913	1.74946	2.2127e-13	0.529153	1.44308	0.00287814	0.572783	1.48739	0.00113134
212828_at	SYNJ2		Synaptojanin-2 (EC 3.1.3.36)(Synaptic inositol-1,4,5-trisphosphate 5-phosphatase 2) [Source:UniProtKB/Swiss-Prot;Acc:O15056]	0.79477	1.7348	5.03948e-06	0.842157	1.79273	0.000815239	0.626286	1.54359	0.00419382	0.828638	1.77601	9.95688e-06	0.813573	1.75756	0.0035754	0.936145	1.91341	0.000161194
212840_at	UBXN7		UBX domain-containing protein 7 [Source:UniProtKB/Swiss-Prot;Acc:O94888]	1.19724	2.293	1.29908e-07	1.01014	2.01411	0.000133453	0.85402	1.80753	1.43096e-07	0.931026	1.90663	1.62344e-08	0.880102	1.84051	0.000177896	0.911095	1.88047	0.000139194
212864_at	CDS2	RAR_RXR	Phosphatidate cytidylyltransferase 2 (EC 2.7.7.41)(CDP-diglyceride pyrophosphorylase 2)(CDP-diglyceride synthetase 2)(CDP-diacylglycerol synthase 2)(CDS 2)(CTP:phosphatidate cytidylyltransferase 2)(CDP-DG synthetase 2)(CDP-DAG synthase 2) [Source:UniProtKB/Swiss-Prot;Acc:O95674]	0.807781	1.75052	3.70986e-05	0.699412	1.62384	0.001852	0.447359	1.36354	0.00630845	0.532511	1.44644	0.000704271	0.711935	1.638	9.22472e-05	0.757271	1.69029	1.20324e-05
212867_at	NCOA2		Nuclear receptor coactivator 2 (NCoA-2)(Transcriptional intermediary factor 2)(hTIF2) [Source:UniProtKB/Swiss-Prot;Acc:Q15596]	0.691073	1.61448	0.00560514	0.67367	1.59513	0.0389512	0.409491	1.32822	0.0291278	0.538259	1.45222	0.0015815	0.650448	1.56966	0.00190439	0.770007	1.70528	9.80671e-05
212870_at	SOS2		Son of sevenless homolog 2 (SOS-2) [Source:UniProtKB/Swiss-Prot;Acc:Q07890]	0.525362	1.43929	0.00023967	0.560369	1.47465	0.00845157	0.417494	1.33561	0.0401463	0.562377	1.4767	0.00129727	0.685378	1.60812	0.000400653	0.77062	1.706	7.52275e-06
212897_at	CDC2L6	PAX3, STAF	Cell division cycle 2-like protein kinase 6 (EC 2.7.11.22)(CDC2-related protein kinase 6)(Death-preventing kinase)(Cyclin-dependent kinase 11) [Source:UniProtKB/Swiss-Prot;Acc:Q9BWU1]	1.07185	2.10213	6.51503e-09	1.25082	2.37977	1.79704e-06	0.669619	1.59065	0.000174827	0.775565	1.71186	2.26054e-05	1.0551	2.07786	1.71861e-09	1.12009	2.1736	5.04228e-11
212899_at	CDC2L6	PAX3, STAF	Cell division cycle 2-like protein kinase 6 (EC 2.7.11.22)(CDC2-related protein kinase 6)(Death-preventing kinase)(Cyclin-dependent kinase 11) [Source:UniProtKB/Swiss-Prot;Acc:Q9BWU1]	0.963829	1.95048	8.20865e-05	1.20727	2.309	0.00065105	0.99016	1.98641	0.00100276	1.1934	2.28691	4.60299e-05	1.70121	3.25173	1.44089e-09	1.81077	3.50831	3.18697e-12
212908_at	DNAJC16		DnaJ homolog subfamily C member 16 Precursor [Source:UniProtKB/Swiss-Prot;Acc:Q9Y2G8]	1.1801	2.26592	3.01114e-07	1.16317	2.23948	0.000135379	0.583101	1.49807	0.000261109	0.731494	1.66036	3.02036e-07	0.726979	1.65517	0.000271984	0.775788	1.71212	3.51659e-05
212915_at	PDZRN3		PDZ domain-containing RING finger protein 3 (Ligand of Numb protein X 3)(Semaphorin cytoplasmic domain-associated protein 3)(Protein SEMACAP3) [Source:UniProtKB/Swiss-Prot;Acc:Q9UPQ7]	0.611165	1.52749	0.000433543	0.610967	1.52728	0.0053321	0.63594	1.55395	0.000640221	0.712255	1.63836	0.000223564	0.914402	1.88479	8.60379e-06	0.953708	1.93684	5.52986e-06
212929_s_at	FAM21A		Protein FAM21A [Source:UniProtKB/Swiss-Prot;Acc:Q641Q2]	0.852235	1.8053	1.09883e-05	0.857162	1.81147	0.00123324	0.568601	1.48308	0.000803176	0.708698	1.63433	5.6492e-06	0.963891	1.95056	2.64838e-07	1.0612	2.08666	6.37015e-11
212936_at	FAM172A		UPF0528 protein FAM172A Precursor [Source:UniProtKB/Swiss-Prot;Acc:Q8WUF8]	0.906696	1.87475	1.79523e-07	0.936775	1.91424	0.00184243	0.945066	1.92528	0.000175797	1.12319	2.17829	3.65683e-06	1.63414	3.10403	1.68559e-09	1.74912	3.36154	5.53655e-12
212943_at	KIAA0528		Uncharacterized protein KIAA0528 [Source:UniProtKB/Swiss-Prot;Acc:Q86YS7]	1.02554	2.03571	2.24494e-06	1.03082	2.04318	0.00292142	0.425361	1.34291	4.66407e-05	0.465596	1.38089	1.24395e-05	0.661064	1.58125	3.40101e-10	0.668824	1.58978	7.34627e-11
212978_at	LRRC8B		Leucine-rich repeat-containing protein 8B (T-cell activation leucine repeat-rich protein) [Source:UniProtKB/Swiss-Prot;Acc:Q6P9F7]	-0.780985	-1.7183	1.53269e-05	-0.645071	-1.56382	0.00837983	-0.434185	-1.35115	0.00015109	-0.497065	-1.41134	9.21477e-06	-0.52722	-1.44115	0.000207935	-0.575592	-1.49029	2.34761e-05
212982_at	ZDHHC17		Palmitoyltransferase ZDHHC17 (EC 2.3.1.-)(Zinc finger DHHC domain-containing protein 17)(DHHC-17)(Huntingtin-interacting protein 14)(Huntingtin-interacting protein 3)(Huntingtin-interacting protein H)(Huntingtin yeast partner H)(Putative MAPK-activating protein PM11)(Putative NF-kappa-B-activating protein 205) [Source:UniProtKB/Swiss-Prot;Acc:Q8IUH5]	0.578818	1.49363	0.000545527	0.569397	1.4839	0.0309596	0.618914	1.53572	0.000398727	0.680431	1.60262	0.000214245	0.520716	1.43467	0.0162399	0.531546	1.44548	0.0170714
212989_at	SGMS1		Phosphatidylcholine:ceramide cholinephosphotransferase 1 (EC 2.7.8.27)(Sphingomyelin synthase 1)(Transmembrane protein 23)(Medulla oblongata-derived protein)(Protein Mob) [Source:UniProtKB/Swiss-Prot;Acc:Q86VZ5]	0.595459	1.51095	0.0201135	0.740977	1.67131	0.0402298	0.860577	1.81576	1.82322e-06	0.963294	1.94976	1.16664e-07	1.08556	2.1222	9.57897e-07	1.12789	2.18539	5.52016e-07
213018_at	GATAD1		GATA zinc finger domain-containing protein 1 (Ocular development-associated gene protein) [Source:UniProtKB/Swiss-Prot;Acc:Q8WUU5]	1.51838	2.8647	2.25332e-07	1.69194	3.23091	5.25173e-06	0.445446	1.36173	0.0186319	0.624705	1.5419	5.56163e-05	0.543296	1.4573	0.0071301	0.631346	1.54901	0.000277908
213073_at	ZFYVE26		Zinc finger FYVE domain-containing protein 26 (Spastizin) [Source:UniProtKB/Swiss-Prot;Acc:Q68DK2]	1.71002	3.27165	1.06912e-09	1.60613	3.04434	2.51312e-05	0.65161	1.57092	1.14852e-06	0.747743	1.67916	1.66708e-09	0.711203	1.63717	0.00019355	0.759563	1.69298	3.69591e-05
213083_at	SLC35D2		UDP-N-acetylglucosamine/UDP-glucose/GDP-mannose transporter (Solute carrier family 35 member D2)(UDP-galactose transporter-related protein 8)(UGTrel8)(SQV7-like protein)(SQV7L)(Homolog of Fringe connection protein 1)(HFRC1) [Source:UniProtKB/Swiss-Prot;Acc:Q76EJ3]	1.05075	2.0716	2.94237e-07	0.850056	1.80257	0.0020902	0.473773	1.38874	0.00221494	0.600128	1.51585	5.96944e-06	0.453003	1.36889	0.0136141	0.52441	1.43835	0.00113259
213094_at	GPR126	PAX3	Probable G-protein coupled receptor 126 Precursor [Source:UniProtKB/Swiss-Prot;Acc:Q86SQ4]	0.856642	1.81082	0.00872072	0.998074	1.99733	0.0325633	0.756297	1.68915	8.4333e-06	0.843217	1.79405	1.34495e-06	1.08489	2.12121	4.34129e-10	1.13425	2.19504	2.9194e-11
213103_at	STARD13	OLF-1	StAR-related lipid transfer protein 13 (START domain-containing protein 13)(StARD13)(Deleted in liver cancer protein 2)(Rho GTPase-activating protein)(46H23.2) [Source:UniProtKB/Swiss-Prot;Acc:Q9Y3M8]	1.08176	2.11662	0.000379414	1.46847	2.76728	0.000260694	1.07644	2.10883	3.10314e-07	1.20583	2.3067	2.72054e-08	0.963229	1.94967	0.0007236	0.962962	1.94931	0.00102797
213106_at	ATP8A1		Probable phospholipid-transporting ATPase IA (EC 3.6.3.1)(Chromaffin granule ATPase II)(ATPase class I type 8A member 1) [Source:UniProtKB/Swiss-Prot;Acc:Q9Y2Q0]	1.97241	3.92422	1.18167e-09	1.91028	3.75883	8.1313e-06	0.774789	1.71094	0.000689793	1.00579	2.00805	4.07992e-08	1.13714	2.19945	2.24403e-06	1.26557	2.40423	6.54815e-11
213134_x_at	BTG3		Protein BTG3 (BTG family member 3)(Protein Tob5)(Abundant in neuroepithelium area protein) [Source:UniProtKB/Swiss-Prot;Acc:Q14201]	-0.930213	-1.90556	0.0143505	-0.862932	-1.81873	0.0473279	-0.947664	-1.92875	0.00391589	-1.29263	-2.44974	4.14608e-07	-1.25924	-2.39369	0.000221273	-1.43259	-2.69931	2.7999e-07
213203_at	SNAPC5		snRNA-activating protein complex subunit 5 (SNAPc subunit 5)(Small nuclear RNA-activating complex polypeptide 5)(snRNA-activating protein complex 19 kDa subunit)(SNAPc 19 kDa subunit) [Source:UniProtKB/Swiss-Prot;Acc:O75971]	-0.474749	-1.38968	5.28872e-05	-0.541488	-1.45547	0.000541379	-0.602702	-1.51856	1.86745e-09	-0.659882	-1.57995	7.24857e-12	-0.635853	-1.55386	8.41765e-07	-0.659125	-1.57912	2.47732e-07
213236_at	SASH1		SAM and SH3 domain-containing protein 1 (Proline-glutamate repeat-containing protein) [Source:UniProtKB/Swiss-Prot;Acc:O94885]	1.43591	2.70553	7.49868e-13	1.42646	2.68786	2.33344e-06	0.6116	1.52795	0.000277142	0.726607	1.65474	1.34902e-05	0.776161	1.71257	1.2551e-05	0.82861	1.77597	2.35352e-06
213243_at	VPS13B		Vacuolar protein sorting-associated protein 13B (Cohen syndrome protein 1) [Source:UniProtKB/Swiss-Prot;Acc:Q7Z7G8]	1.0353	2.04954	0.000142142	1.15199	2.2222	0.00185929	0.754458	1.687	0.00407768	0.937157	1.91475	5.60737e-05	1.1308	2.1898	2.65241e-05	1.22912	2.34424	1.39035e-07
213254_at	TNRC6B		Trinucleotide repeat-containing gene 6B protein [Source:UniProtKB/Swiss-Prot;Acc:Q9UPQ9]	0.701113	1.62576	2.04484e-07	0.639929	1.55825	0.000762775	0.654161	1.5737	1.2914e-06	0.776852	1.71339	3.13078e-10	0.766442	1.70107	7.50533e-06	0.875292	1.83438	8.40138e-08
213322_at	C6orf130	PAX3, RAR_RXR	Uncharacterized protein C6orf130 [Source:UniProtKB/Swiss-Prot;Acc:Q9Y530]	0.675026	1.59663	0.000946164	0.70956	1.63531	0.012414	0.680644	1.60285	0.00145893	0.764861	1.69921	0.00054823	0.919871	1.89195	5.01153e-05	0.96358	1.95014	2.28069e-05
213330_s_at	AP005668.1		Stress-induced-phosphoprotein 1 (STI1)(Hsc70/Hsp90-organizing protein)(Hop)(Transformation-sensitive protein IEF SSP 3521)(NY-REN-11 antigen) [Source:UniProtKB/Swiss-Prot;Acc:P31948]	-1.10148	-2.14575	1.30176e-10	-1.19346	-2.28701	1.6506e-06	-0.701641	-1.62635	2.96502e-05	-0.757534	-1.6906	1.17487e-05	-0.662459	-1.58278	0.00237066	-0.680967	-1.60321	0.00205257
213342_at	YAP1		65 kDa Yes-associated protein (YAP65) [Source:UniProtKB/Swiss-Prot;Acc:P46937]	0.75452	1.68707	7.71551e-14	0.67928	1.60134	5.2199e-07	0.530696	1.44463	3.46492e-06	0.60571	1.52173	7.55458e-07	0.427704	1.34509	0.00591796	0.429026	1.34632	0.0109516
213390_at	ZC3H4		Zinc finger CCCH domain-containing protein 4 [Source:UniProtKB/Swiss-Prot;Acc:Q9UPT8]	1.12122	2.1753	5.467e-09	0.987293	1.98246	1.11184e-05	0.813518	1.75749	1.39897e-08	0.838145	1.78775	5.037e-08	1.02655	2.03714	2.99613e-10	1.03218	2.04511	3.70935e-10
213413_at	STON1		Stonin-1 (Stoned B-like factor) [Source:UniProtKB/Swiss-Prot;Acc:Q9Y6Q2]	3.37685	10.388	5.54179e-09	3.48298	11.181	4.38813e-05	0.552015	1.46613	0.0081482	0.645375	1.56415	0.0025417	1.30312	2.46761	1.04103e-13	1.37896	2.60082	1.13561e-17
213527_s_at	ZNF688		Zinc finger protein 688 [Source:UniProtKB/Swiss-Prot;Acc:P0C7X2]	1.062	2.08783	9.53292e-07	1.16179	2.23735	6.98946e-05	0.446356	1.36259	6.43396e-05	0.554515	1.46867	2.00891e-06	0.559245	1.4735	4.26553e-05	0.587865	1.50302	1.11226e-05
213562_s_at	SQLE		Squalene monooxygenase (EC 1.14.99.7)(Squalene epoxidase)(SE) [Source:UniProtKB/Swiss-Prot;Acc:Q14534]	-1.29821	-2.45924	3.12203e-05	-1.03781	-2.05311	0.00407398	-0.433019	-1.35006	0.00777426	-0.549308	-1.46338	0.000117951	-0.583977	-1.49898	0.000608533	-0.643152	-1.56174	2.93035e-05
213577_at	SQLE		Squalene monooxygenase (EC 1.14.99.7)(Squalene epoxidase)(SE) [Source:UniProtKB/Swiss-Prot;Acc:Q14534]	-1.04495	-2.0633	3.13281e-05	-0.844724	-1.79592	0.00111951	-0.434067	-1.35104	0.0112995	-0.53574	-1.44969	0.000579974	-0.585972	-1.50105	0.00138746	-0.644083	-1.56275	0.000212329
213694_at	RSBN1	AhR/Arnt, OLF-1	Round spermatid basic protein 1 [Source:UniProtKB/Swiss-Prot;Acc:Q5VWQ0]	0.766749	1.70143	0.0122226	0.835376	1.78432	0.0415152	0.60651	1.52257	0.0390526	0.769392	1.70455	0.0036527	0.808369	1.75123	0.0359986	0.903781	1.87096	0.0118632
213741_s_at	KPNA1		Importin subunit alpha-1 (Karyopherin subunit alpha-1)(SRP1-beta)(RAG cohort protein 2)(Nucleoprotein interactor 1)(NPI-1) [Source:UniProtKB/Swiss-Prot;Acc:P52294]	-0.515099	-1.42909	0.000371928	-0.562371	-1.47669	0.000680395	-0.440707	-1.35727	0.00398785	-0.511813	-1.42584	0.000544738	-0.624664	-1.54185	0.000159087	-0.665632	-1.58626	1.93713e-05
213926_s_at	AGFG1		Arf-GAP domain and FG repeats-containing protein 1 (Nucleoporin-like protein RIP)(HIV-1 Rev-binding protein)(Rev-interacting protein)(Rev/Rex activation domain-binding protein) [Source:UniProtKB/Swiss-Prot;Acc:P52594]	-0.654532	-1.57411	6.66907e-05	-0.790472	-1.72964	0.00027875	-0.6163	-1.53294	0.00280397	-0.733292	-1.66243	0.000263836	-0.750548	-1.68243	0.00178692	-0.787928	-1.72659	0.000631062
214011_s_at	NOP16	STAF	Nucleolar protein 16 (HBV pre-S2 trans-regulated protein 3) [Source:UniProtKB/Swiss-Prot;Acc:Q9Y3C1]	-0.594052	-1.50948	0.014138	-0.862478	-1.81816	0.00469792	-0.949299	-1.93093	4.55977e-06	-1.02432	-2.03401	2.6116e-06	-0.947505	-1.92854	0.000449473	-0.939122	-1.91736	0.000828343
214141_x_at	SFRS7		Splicing factor, arginine/serine-rich 7 (Splicing factor 9G8) [Source:UniProtKB/Swiss-Prot;Acc:Q16629]	-1.06785	-2.09631	4.04699e-07	-0.839456	-1.78938	0.000994618	-0.764535	-1.69882	6.69887e-07	-0.879772	-1.84009	7.29972e-10	-0.590902	-1.50619	0.00363728	-0.632866	-1.55064	0.00138686
214290_s_at	HIST2H2AA3		Histone H2A type 2-A (H2A.2)(H2A/o) [Source:UniProtKB/Swiss-Prot;Acc:Q6FI13]	1.32703	2.50886	4.99218e-07	1.46623	2.76299	0.000189206	0.657828	1.57771	0.00393718	0.891363	1.85493	4.42721e-07	0.75739	1.69043	0.00718699	0.89715	1.86238	0.000114694
214415_at	PLGLA		plasminogen-like A (PLGLA), non-coding RNA [Source:RefSeq DNA;Acc:NR_003506]	0.829816	1.77746	0.000752262	0.771054	1.70652	0.0257361	0.517873	1.43184	0.00228902	0.659577	1.57962	6.70022e-05	0.708642	1.63427	0.000172932	0.787064	1.72556	2.38864e-05
214427_at	IFFO1		Intermediate filament family orphan 1 (HOM-TES-103 tumor antigen) [Source:UniProtKB/Swiss-Prot;Acc:Q0D2I5]	-0.952838	-1.93568	1.88908e-07	-0.89474	-1.85927	0.000495328	-0.851784	-1.80473	1.15754e-06	-0.991443	-1.98817	2.07061e-09	-0.721078	-1.64841	0.0017085	-0.783243	-1.721	0.000509033
214427_at	NOP2		Putative ribosomal RNA methyltransferase NOP2 (EC 2.1.1.-)(Nucleolar protein 2 homolog)(Nucleolar protein 1)(Proliferating-cell nucleolar antigen p120)(Proliferation-associated nucleolar protein p120) [Source:UniProtKB/Swiss-Prot;Acc:P46087]	-0.781466	-1.71888	8.11071e-07	-0.780323	-1.71752	0.000202805	-0.734035	-1.66328	1.39278e-07	-0.799093	-1.74001	1.62461e-08	-0.533818	-1.44776	0.00691433	-0.545341	-1.45937	0.0066405
214496_x_at	MYST4		Histone acetyltransferase MYST4 (MYST protein 4)(EC 2.3.1.48)(EC 2.3.1.-)(MOZ, YBF2/SAS3, SAS2 and TIP60 protein 4)(Histone acetyltransferase MOZ2)(Monocytic leukemia zinc finger protein-related factor)(Histone acetyltransferase MORF) [Source:UniProtKB/Swiss-Prot;Acc:Q8WYB5]	0.682776	1.60523	2.34968e-05	0.660517	1.58065	0.000707666	0.87018	1.82789	6.60412e-05	1.01703	2.02374	1.27581e-06	1.06182	2.08757	0.00013705	1.14229	2.20731	2.20907e-05
214696_at	C17orf91	PAX3, PAX9, RAR_RXR, STAF	chromosome 17 open reading frame 91 (C17orf91), transcript variant 1, mRNA [Source:RefSeq DNA;Acc:NM_032895]	-0.98718	-1.98231	0.00261089	-1.23516	-2.35407	7.72146e-05	-1.13996	-2.20375	0.0088751	-1.38496	-2.61165	0.00147671	-1.10952	-2.15774	0.0291557	-1.29386	-2.45184	0.0108482
214718_at	GATAD1		GATA zinc finger domain-containing protein 1 (Ocular development-associated gene protein) [Source:UniProtKB/Swiss-Prot;Acc:Q8WUU5]	0.647761	1.56674	0.00141438	0.830581	1.7784	0.00323991	0.668419	1.58933	1.48644e-07	0.805488	1.74774	1.281e-13	0.505711	1.41982	0.00416451	0.561867	1.47618	0.00106637
214748_at	N4BP2L1		NEDD4-binding protein 2-like 1 [Source:UniProtKB/Swiss-Prot;Acc:Q5TBK1]	0.798627	1.73945	0.00204372	0.994525	1.99242	0.00666343	0.778154	1.71494	0.012093	1.09203	2.13173	7.35868e-05	1.53294	2.89375	8.01332e-09	1.6789	3.20183	8.7857e-15
214946_x_at	FAM21A		Protein FAM21A [Source:UniProtKB/Swiss-Prot;Acc:Q641Q2]	0.946949	1.92779	2.88892e-07	0.90876	1.87743	0.000246084	0.47391	1.38887	0.00190506	0.607228	1.52333	4.92944e-06	0.831713	1.7798	2.20816e-06	0.92334	1.8965	5.01223e-10
215071_s_at	HIST1H2AC		Histone H2A type 1-C (H2A/l) [Source:UniProtKB/Swiss-Prot;Acc:Q93077]	1.53327	2.8944	2.98995e-08	1.76181	3.39124	8.66846e-06	1.02213	2.03092	0.00160244	1.40968	2.65678	1.4243e-10	1.28813	2.44211	0.000659616	1.48982	2.80855	1.36793e-07
215111_s_at	TSC22D1	AhR/Arnt, OLF-1	TSC22 domain family protein 1 (Transforming growth factor beta-1-induced transcript 4 protein)(Regulatory protein TSC-22)(TGFB-stimulated clone 22 homolog)(Cerebral protein 2) [Source:UniProtKB/Swiss-Prot;Acc:Q15714]	0.93259	1.9087	2.01725e-06	0.821911	1.76775	0.000470333	0.500473	1.41468	0.0140525	0.667785	1.58863	0.000191345	0.936102	1.91335	2.41358e-07	1.01875	2.02616	1.61153e-11
215236_s_at	PICALM	RAR_RXR, STAF	Phosphatidylinositol-binding clathrin assembly protein (Clathrin assembly lymphoid myeloid leukemia protein) [Source:UniProtKB/Swiss-Prot;Acc:Q13492]	-0.782887	-1.72057	4.45662e-06	-0.934562	-1.91131	0.000147241	-0.423596	-1.34127	0.00408657	-0.497304	-1.41157	0.00082508	-0.455829	-1.37157	0.0107751	-0.495473	-1.40978	0.00498411
215533_s_at	UBE4B	AhR/Arnt, OLF-1, RAR_RXR	Ubiquitin conjugation factor E4 B (Ubiquitin fusion degradation protein 2)(Homozygously deleted in neuroblastoma 1) [Source:UniProtKB/Swiss-Prot;Acc:O95155]	0.985535	1.98005	7.29956e-06	1.00735	2.01022	0.000173687	0.633076	1.55087	0.000510306	0.738448	1.66838	6.13747e-05	0.965638	1.95293	4.67545e-07	0.990646	1.98707	1.01103e-07
215707_s_at	PRNP	OLF-1	Major prion protein Precursor (PrP)(PrP27-30)(PrP33-35C)(ASCR)(CD230 antigen) [Source:UniProtKB/Swiss-Prot;Acc:P04156]	-1.2575	-2.39082	0.000484953	-1.15784	-2.23123	0.0398256	-0.825264	-1.77186	0.00113721	-0.908163	-1.87665	0.000675183	-1.5391	-2.90613	3.15007e-11	-1.58583	-3.0018	1.23269e-11
215905_s_at	SNRNP40		U5 small nuclear ribonucleoprotein 40 kDa protein (U5 snRNP 40 kDa protein)(U5-40K)(U5 snRNP-specific 40 kDa protein)(38 kDa-splicing factor)(WD repeat-containing protein 57)(Prp8-binding protein)(hPRP8BP) [Source:UniProtKB/Swiss-Prot;Acc:Q96DI7]	-0.597973	-1.51359	5.68967e-06	-0.545109	-1.45913	0.000651297	-0.887392	-1.84983	5.87201e-06	-0.956981	-1.94124	2.70783e-06	-0.665099	-1.58568	0.0110604	-0.683386	-1.6059	0.0114635
215945_s_at	TRIM2		Tripartite motif-containing protein 2 (RING finger protein 86) [Source:UniProtKB/Swiss-Prot;Acc:Q9C040]	1.4837	2.79666	1.24775e-07	1.53102	2.8899	0.000104459	0.975942	1.96693	2.79136e-06	1.15211	2.22238	4.62779e-09	1.19413	2.28806	1.85666e-07	1.28685	2.43995	3.76047e-09
216041_x_at	GRN		Granulins Precursor (Proepithelin)(PEPI) [Contains Acrogranin;Paragranulin;Granulin-1(Granulin G);Granulin-2(Granulin F);Granulin-3(Granulin B);Granulin-4(Granulin A);Granulin-5(Granulin C);Granulin-6(Granulin D);Granulin-7(Granulin E)] [Source:UniProtKB/Swiss-Prot;Acc:P28799]	0.74276	1.67337	0.000154331	0.767954	1.70285	1.35742e-05	0.482674	1.39733	0.0155511	0.675825	1.59751	8.77933e-07	0.602807	1.51867	0.00838577	0.72769	1.65598	1.71043e-05
216321_s_at	NR3C1	AhR/Arnt, PAX3	Glucocorticoid receptor (GR)(Nuclear receptor subfamily 3 group C member 1) [Source:UniProtKB/Swiss-Prot;Acc:P04150]	1.18443	2.27273	0.000280485	0.843173	1.79399	0.00480611	0.672322	1.59364	7.55253e-06	0.751203	1.6832	1.40153e-06	1.00929	2.01292	3.03124e-09	1.05381	2.07601	7.44209e-10
217047_s_at	FAM13A		Protein FAM13A [Source:UniProtKB/Swiss-Prot;Acc:O94988]	0.902026	1.86869	3.45088e-06	0.800762	1.74202	0.000455327	0.884716	1.8464	1.37016e-09	0.985575	1.9801	7.57849e-11	0.856565	1.81072	1.45815e-05	0.867059	1.82394	2.85338e-05
217100_s_at	UBXN7		UBX domain-containing protein 7 [Source:UniProtKB/Swiss-Prot;Acc:O94888]	1.22216	2.33296	2.98995e-08	1.13995	2.20374	4.63651e-05	0.57423	1.48888	4.91289e-05	0.615759	1.53236	6.98012e-06	0.50416	1.4183	0.00755302	0.51812	1.43209	0.00430519
217118_s_at	C22orf9		Uncharacterized protein C22orf9 [Source:UniProtKB/Swiss-Prot;Acc:Q6ICG6]	-0.43833	-1.35503	0.000693262	-0.502353	-1.41652	0.00166043	-0.577308	-1.49206	0.00139722	-0.629985	-1.54755	0.000968498	-0.640391	-1.55875	0.00121126	-0.656605	-1.57637	0.00142489
217122_s_at	CDC2L2		PITSLRE serine/threonine-protein kinase CDC2L2 (EC 2.7.11.22)(Cell division cycle 2-like protein kinase 2)(Galactosyltransferase-associated protein kinase p58/GTA)(CDK11) [Source:UniProtKB/Swiss-Prot;Acc:Q9UQ88]	0.665247	1.58584	0.00010819	0.769692	1.70491	0.000188716	0.475376	1.39028	0.0324236	0.679642	1.60174	4.97129e-05	0.861457	1.81687	2.31719e-05	0.974615	1.96512	1.06609e-10
217617_at	Unknown		Unknown	1.3855	2.61263	0.00135787	1.38064	2.60384	0.00766995	1.04823	2.06799	0.000622443	1.34993	2.54899	1.38889e-06	1.45026	2.73258	1.69772e-05	1.6478	3.13356	1.11551e-07
217783_s_at	YPEL5		Protein yippee-like 5 [Source:UniProtKB/Swiss-Prot;Acc:P62699]	0.935198	1.91215	7.10523e-05	1.13591	2.19758	0.0010451	0.591311	1.50662	0.00293468	0.768545	1.70355	5.48021e-06	0.649176	1.56827	0.00316286	0.740439	1.67068	0.000142199
217784_at	YKT6		Synaptobrevin homolog YKT6 (EC 2.3.1.-) [Source:UniProtKB/Swiss-Prot;Acc:O15498]	-0.719283	-1.64636	2.45287e-07	-0.781526	-1.71895	2.62127e-05	-0.545111	-1.45913	0.0028476	-0.609551	-1.52578	0.00107442	-1.01598	-2.02228	2.09939e-09	-1.04405	-2.06201	3.00609e-10
217799_x_at	UBE2H	AhR/Arnt, OLF-1, STAF	Ubiquitin-conjugating enzyme E2 H (EC 6.3.2.19)(Ubiquitin-protein ligase H)(Ubiquitin carrier protein H)(UbcH2)(E2-20K) [Source:UniProtKB/Swiss-Prot;Acc:P62256]	1.06196	2.08776	1.81709e-09	1.16007	2.23468	2.56316e-07	0.517272	1.43125	2.52973e-05	0.614887	1.53144	6.85037e-08	0.523244	1.43718	0.000292147	0.566886	1.48132	5.99064e-05
217835_x_at	C20orf24	AhR/Arnt	Uncharacterized protein C20orf24 (Rab5-interacting protein)(RIP5) [Source:UniProtKB/Swiss-Prot;Acc:Q9BUV8]	-0.757616	-1.69069	0.000259029	-0.846338	-1.79793	0.00464315	-0.494376	-1.40871	2.75184e-09	-0.52493	-1.43886	9.21737e-10	-0.452669	-1.36857	2.98088e-05	-0.468785	-1.38394	2.99158e-05
217845_x_at	HIGD1A		HIG1 domain family member 1A (Hypoxia-inducible gene 1 protein) [Source:UniProtKB/Swiss-Prot;Acc:Q9Y241]	-0.874225	-1.83302	2.89789e-08	-0.867633	-1.82467	1.2351e-07	-0.453345	-1.36921	5.24932e-07	-0.503689	-1.41783	5.50081e-08	-0.633033	-1.55082	3.72414e-12	-0.658403	-1.57833	6.11481e-13
217861_s_at	PREB		Prolactin regulatory element-binding protein (Mammalian guanine nucleotide exchange factor mSec12) [Source:UniProtKB/Swiss-Prot;Acc:Q9HCU5]	-0.431549	-1.34868	0.0196377	-0.535183	-1.44913	0.014468	-0.529068	-1.443	1.6475e-06	-0.565607	-1.48001	1.26638e-06	-0.65506	-1.57468	9.00438e-07	-0.673154	-1.59456	5.78734e-07
217906_at	KLHDC2		Kelch domain-containing protein 2 (Hepatocellular carcinoma-associated antigen 33)(Host cell factor homolog LCP)(Host cell factor-like protein 1)(HCLP-1) [Source:UniProtKB/Swiss-Prot;Acc:Q9Y2U9]	1.37795	2.59899	2.57761e-13	1.45546	2.74243	2.03157e-07	0.583523	1.4985	2.13015e-05	0.684809	1.60749	2.02767e-07	0.553441	1.46758	0.000757524	0.592259	1.50761	0.000247847
217972_at	CHCHD3	STAF	Coiled-coil-helix-coiled-coil-helix domain-containing protein 3, mitochondrial Precursor [Source:UniProtKB/Swiss-Prot;Acc:Q9NX63]	-0.765303	-1.69973	3.99714e-05	-0.866675	-1.82346	3.42904e-06	-0.47675	-1.39161	0.0027965	-0.665114	-1.58569	1.63735e-07	-0.773743	-1.7097	3.30308e-06	-0.886132	-1.84821	3.20925e-11
218004_at	BSDC1		BSD domain-containing protein 1 [Source:UniProtKB/Swiss-Prot;Acc:Q9NW68]	0.85392	1.8074	4.42284e-07	0.885034	1.84681	0.000329277	0.654933	1.57454	9.88778e-09	0.740258	1.67047	2.2729e-11	0.732632	1.66167	4.85866e-06	0.781672	1.71912	7.3197e-07
218022_at	VRK3		Serine/threonine-protein kinase VRK3 (EC 2.7.11.1)(Vaccinia-related kinase 3) [Source:UniProtKB/Swiss-Prot;Acc:Q8IV63]	0.770214	1.70552	5.70107e-08	0.611282	1.52762	0.000162357	0.449371	1.36545	0.000826915	0.526879	1.44081	5.21758e-05	0.504932	1.41906	0.00148361	0.55672	1.47092	0.00033112
218031_s_at	FOXN3		Forkhead box protein N3 (Checkpoint suppressor 1) [Source:UniProtKB/Swiss-Prot;Acc:O00409]	1.32983	2.51372	1.18363e-07	1.5147	2.85739	2.63344e-05	0.588211	1.50338	0.0370233	0.827148	1.77417	0.000296476	0.928145	1.90283	0.000594654	1.08389	2.11974	1.25888e-06
218057_x_at	COX4NB		Neighbor of COX4 (Protein FAM158B) [Source:UniProtKB/Swiss-Prot;Acc:O43402]	-0.430426	-1.34763	0.00128861	-0.608389	-1.52456	5.51287e-05	-0.705673	-1.6309	3.66442e-07	-0.776103	-1.7125	6.88391e-08	-0.519538	-1.4335	0.0066534	-0.561347	-1.47565	0.00448738
218069_at	DCTPP1		dCTP pyrophosphatase 1 (EC 3.6.1.12)(Deoxycytidine-triphosphatase 1)(dCTPase 1)(XTP3-transactivated gene A protein)(RS21C6) [Source:UniProtKB/Swiss-Prot;Acc:Q9H773]	-0.576412	-1.49114	0.000130355	-0.5947	-1.51016	0.00118615	-0.693915	-1.61767	8.74851e-06	-0.752125	-1.68427	6.44511e-06	-0.45604	-1.37177	0.0334365	-0.457247	-1.37292	0.0422838
218072_at	COMMD9	STAF	COMM domain-containing protein 9 [Source:UniProtKB/Swiss-Prot;Acc:Q9P000]	0.81239	1.75612	0.00045566	0.57737	1.49213	0.0236068	0.547231	1.46128	0.00423563	0.62732	1.54469	0.00131349	0.731588	1.66047	0.000637857	0.785801	1.72405	0.000318081
218093_s_at	ANKRD10		Ankyrin repeat domain-containing protein 10 [Source:UniProtKB/Swiss-Prot;Acc:Q9NXR5]	0.57297	1.48758	0.000379414	0.681951	1.60431	0.0037357	0.546851	1.46089	0.00124759	0.70688	1.63227	3.29157e-08	0.769031	1.70412	7.96218e-05	0.873279	1.83182	1.51109e-08
218096_at	AGPAT5		1-acyl-sn-glycerol-3-phosphate acyltransferase epsilon (EC 2.3.1.51)(1-acylglycerol-3-phosphate O-acyltransferase 5)(1-AGP acyltransferase 5)(1-AGPAT 5)(Lysophosphatidic acid acyltransferase epsilon)(LPAAT-epsilon) [Source:UniProtKB/Swiss-Prot;Acc:Q9NUQ2]	-1.17481	-2.25762	7.94646e-06	-1.10982	-2.15819	0.00249997	-0.489749	-1.4042	0.000611886	-0.614398	-1.53092	5.41856e-07	-0.412507	-1.331	0.0217686	-0.465786	-1.38107	0.00385547
218099_at	TEX2		Testis-expressed sequence 2 protein [Source:UniProtKB/Swiss-Prot;Acc:Q8IWB9]	-0.714998	-1.64148	2.58779e-06	-0.722085	-1.64956	1.63193e-05	-0.610821	-1.52713	1.39897e-08	-0.70704	-1.63245	1.37133e-11	-0.456452	-1.37216	0.00243748	-0.469994	-1.3851	0.00244004
218119_at	TIMM23B		Putative mitochondrial import inner membrane translocase subunit Tim23B [Source:UniProtKB/Swiss-Prot;Acc:Q5SRD1]	-0.409373	-1.32811	0.00700741	-0.460349	-1.37587	0.0178299	-0.609171	-1.52538	0.000751119	-0.794917	-1.73498	7.08483e-08	-0.834603	-1.78337	2.92729e-05	-0.94352	-1.92322	8.39904e-09
218131_s_at	GATAD2A		Transcriptional repressor p66-alpha (Hp66alpha)(GATA zinc finger domain-containing protein 2A) [Source:UniProtKB/Swiss-Prot;Acc:Q86YP4]	-0.422209	-1.33998	0.020105	-0.57646	-1.49119	0.0147731	-0.599269	-1.51495	1.00888e-05	-0.654746	-1.57434	4.04253e-06	-0.510516	-1.42456	0.00668342	-0.548383	-1.46245	0.00552496
218140_x_at	SRPRB		Signal recognition particle receptor subunit beta (SR-beta)(Protein APMCF1) [Source:UniProtKB/Swiss-Prot;Acc:Q9Y5M8]	-0.819564	-1.76487	2.8863e-07	-0.926257	-1.90034	4.13659e-06	-0.502019	-1.41619	0.00801809	-0.600697	-1.51645	0.00128948	-0.996148	-1.99467	1.68559e-09	-1.05844	-2.08268	8.82525e-12
218142_s_at	CRBN		Protein cereblon [Source:UniProtKB/Swiss-Prot;Acc:Q96SW2]	0.794745	1.73477	5.81863e-07	0.858651	1.81334	9.15337e-05	0.826316	1.77315	8.87446e-08	0.930975	1.90656	6.15733e-10	0.821903	1.76774	1.64939e-05	0.862101	1.81768	5.97739e-06
218156_s_at	TSR1		Pre-rRNA-processing protein TSR1 homolog [Source:UniProtKB/Swiss-Prot;Acc:Q2NL82]	-0.478921	-1.3937	0.00196943	-0.64218	-1.56069	0.003164	-0.473965	-1.38892	0.000150184	-0.574152	-1.4888	1.31094e-07	-0.510524	-1.42457	0.00042005	-0.571861	-1.48644	1.26497e-05
218168_s_at	CABC1		Chaperone activity of bc1 complex-like, mitochondrial Precursor (Chaperone-ABC1-like)(aarF domain-containing protein kinase 3) [Source:UniProtKB/Swiss-Prot;Acc:Q8NI60]	1.76357	3.39537	6.80915e-09	1.59282	3.01639	0.000233518	1.05121	2.07226	5.25633e-06	1.24709	2.37362	7.81757e-08	1.18535	2.27418	2.57149e-05	1.28149	2.43091	3.44989e-06
218171_at	VPS4B	PAX3	Vacuolar protein sorting-associated protein 4B (Suppressor of K(+) transport growth defect 1)(Protein SKD1) [Source:UniProtKB/Swiss-Prot;Acc:O75351]	0.466418	1.38167	0.0012034	0.459483	1.37505	0.0175432	0.581758	1.49667	3.35703e-07	0.616982	1.53366	8.046e-08	0.5392	1.45317	0.00026015	0.546365	1.4604	0.00027436
218191_s_at	LMBRD1		Probable lysosomal cobalamin transporter (LMBR1 domain-containing protein 1)(Nuclear export signal-interacting protein)(HDAg-L-interacting protein NESI) [Source:UniProtKB/Swiss-Prot;Acc:Q9NUN5]	0.549671	1.46375	8.2573e-06	0.604797	1.52076	0.000327018	0.418306	1.33636	0.00210018	0.528794	1.44272	1.53606e-05	0.658945	1.57893	5.46149e-06	0.714398	1.6408	3.24637e-08
218194_at	REXO2	STAF	Oligoribonuclease, mitochondrial Precursor (EC 3.1.-.-)(Small fragment nuclease)(RNA exonuclease 2 homolog) [Source:UniProtKB/Swiss-Prot;Acc:Q9Y3B8]	1.74701	3.35662	2.8997e-12	1.69367	3.23479	2.93354e-06	0.719155	1.64622	2.74826e-07	0.810617	1.75396	2.67552e-09	0.946169	1.92675	1.5867e-10	0.993586	1.99113	3.21899e-12
218204_s_at	FYCO1		FYVE and coiled-coil domain-containing protein 1 (Zinc finger FYVE domain-containing protein 7) [Source:UniProtKB/Swiss-Prot;Acc:Q9BQS8]	0.527877	1.44181	0.0164625	0.864039	1.82013	0.00115624	0.622741	1.5398	2.45995e-05	0.741292	1.67167	1.19969e-07	0.866895	1.82373	1.97171e-08	0.92552	1.89937	1.17734e-10
218238_at	GTPBP4		Nucleolar GTP-binding protein 1 (Chronic renal failure gene protein)(GTP-binding protein NGB) [Source:UniProtKB/Swiss-Prot;Acc:Q9BZE4]	-0.759395	-1.69278	7.448e-07	-0.709229	-1.63493	8.48497e-05	-0.813633	-1.75763	6.75499e-08	-0.960237	-1.94563	1.49092e-13	-0.739145	-1.66919	0.000335628	-0.805644	-1.74793	4.52697e-05
218239_s_at	GTPBP4		Nucleolar GTP-binding protein 1 (Chronic renal failure gene protein)(GTP-binding protein NGB) [Source:UniProtKB/Swiss-Prot;Acc:Q9BZE4]	-0.590502	-1.50577	1.09433e-05	-0.569092	-1.48359	0.000120835	-0.672746	-1.5941	1.89736e-06	-0.799025	-1.73992	3.47538e-10	-0.591112	-1.50641	0.00184242	-0.641411	-1.55985	0.00042409
218260_at	DDA1	OLF-1	DET1- and DDB1-associated protein 1 (Placenta cross-immune reaction antigen 1)(PCIA-1) [Source:UniProtKB/Swiss-Prot;Acc:Q9BW61]	-0.492782	-1.40716	0.000578715	-0.647795	-1.56677	0.000117678	-0.467106	-1.38233	0.00575968	-0.578169	-1.49295	0.000104581	-0.651974	-1.57132	0.00037514	-0.726691	-1.65484	1.1253e-05
218268_at	TBC1D15		TBC1 domain family member 15 [Source:UniProtKB/Swiss-Prot;Acc:Q8TC07]	0.997458	1.99648	0.000209027	1.21579	2.32268	0.000984676	0.656627	1.57639	0.000218481	0.696734	1.62083	0.000231376	0.620581	1.53749	0.00494738	0.627447	1.54483	0.00636707
218277_s_at	DHX40	STAF	Probable ATP-dependent RNA helicase DHX40 (EC 3.6.1.-)(DEAH box protein 40)(Protein PAD) [Source:UniProtKB/Swiss-Prot;Acc:Q8IX18]	0.842325	1.79294	0.0105402	1.02828	2.03959	0.0435188	0.543197	1.4572	1.33844e-06	0.583301	1.49827	1.97287e-07	0.609529	1.52576	3.9834e-06	0.627655	1.54505	2.36405e-06
218280_x_at	HIST2H2AA3		Histone H2A type 2-A (H2A.2)(H2A/o) [Source:UniProtKB/Swiss-Prot;Acc:Q6FI13]	1.46235	2.75557	3.13515e-07	1.62761	3.09001	0.0001706	0.682662	1.6051	0.00663874	0.936078	1.91332	1.37348e-06	0.811274	1.75476	0.00868379	0.954118	1.93739	9.96714e-05
218296_x_at	MSTO1		Protein misato homolog 1 [Source:UniProtKB/Swiss-Prot;Acc:Q9BUK6]	-0.543498	-1.4575	0.00503584	-0.475978	-1.39086	0.0353105	-0.81087	-1.75427	0.0230181	-1.03192	-2.04474	0.00161263	-1.62168	-3.07733	9.73764e-07	-1.74398	-3.34958	6.3587e-09
218331_s_at	C10orf18		Uncharacterized protein C10orf18 [Source:UniProtKB/Swiss-Prot;Acc:Q5VWN6]	-0.466264	-1.38153	0.00233681	-0.542164	-1.45615	0.0126067	-0.67077	-1.59192	2.85583e-07	-0.738138	-1.66802	1.08728e-08	-0.509851	-1.4239	0.0103915	-0.551923	-1.46604	0.00636911
218417_s_at	SLC48A1		Heme transporter HRG1 (Heme-responsive gene 1 protein homolog)(HRG-1)(hHRG-1)(Solute carrier family 48 member 1) [Source:UniProtKB/Swiss-Prot;Acc:Q6P1K1]	-0.406238	-1.32523	0.000625219	-0.550998	-1.4651	0.00285888	-0.635448	-1.55342	5.552e-05	-0.613246	-1.5297	0.000190478	-0.949296	-1.93093	2.1951e-06	-0.955238	-1.9389	6.45914e-06
218427_at	SDCCAG3	AhR/Arnt	Serologically defined colon cancer antigen 3 (Antigen NY-CO-3) [Source:UniProtKB/Swiss-Prot;Acc:Q96C92]	-0.650628	-1.56985	0.00113876	-0.515091	-1.42908	0.040228	-0.805603	-1.74788	1.91825e-07	-0.891436	-1.85502	2.01785e-08	-0.572749	-1.48735	0.0145538	-0.594225	-1.50966	0.0135543
218437_s_at	LZTFL1		Leucine zipper transcription factor-like protein 1 [Source:UniProtKB/Swiss-Prot;Acc:Q9NQ48]	0.950005	1.93188	0.000174214	0.882092	1.84305	0.0130721	1.24981	2.37811	1.86745e-09	1.28279	2.43309	1.43239e-09	1.01279	2.01781	0.000538783	0.996124	1.99463	0.000822685
218459_at	TOR3A		Torsin-3A Precursor (Torsin family 3 member A)(ATP-dependent interferon-responsive protein) [Source:UniProtKB/Swiss-Prot;Acc:Q9H497]	-0.819449	-1.76473	0.000245156	-1.03121	-2.04373	0.00137135	-0.954946	-1.93851	5.29212e-11	-1.0387	-2.05437	2.87613e-13	-0.786116	-1.72443	0.000343434	-0.818779	-1.76391	0.000276688
218488_at	EIF2B3	AhR/Arnt	Translation initiation factor eIF-2B subunit gamma (eIF-2B GDP-GTP exchange factor subunit gamma) [Source:UniProtKB/Swiss-Prot;Acc:Q9NR50]	-0.725057	-1.65297	0.00150552	-0.976783	-1.96807	0.000271609	-0.463289	-1.37868	0.000253385	-0.57148	-1.48605	2.73123e-07	-0.690563	-1.61391	5.03969e-08	-0.747602	-1.679	5.34842e-12
218499_at	STK3		Serine/threonine-protein kinase MST4 (EC 2.7.11.1)(Mammalian STE20-like protein kinase 4)(STE20-like kinase MST4)(MST-4)(Serine/threonine-protein kinase MASK)(Mst3 and SOK1-related kinase) [Source:UniProtKB/Swiss-Prot;Acc:Q9P289]	-1.15393	-2.2252	4.07145e-06	-1.2116	-2.31594	0.00110827	-0.521198	-1.43515	4.48408e-05	-0.624252	-1.54141	2.82128e-08	-0.604599	-1.52056	0.000402492	-0.678332	-1.60029	1.80501e-05
218501_at	ARHGEF3		Rho guanine nucleotide exchange factor 3 (Exchange factor found in platelets and leukemic and neuronal tissues)(XPLN) [Source:UniProtKB/Swiss-Prot;Acc:Q9NR81]	0.959682	1.94488	5.76576e-05	0.727071	1.65527	0.0186399	0.739795	1.66994	0.000159379	0.844086	1.79513	3.21236e-05	1.19617	2.29131	1.08574e-08	1.26467	2.40273	2.96152e-10
218518_at	FAM13B		Protein FAM13B (GAP-like protein N61) [Source:UniProtKB/Swiss-Prot;Acc:Q9NYF5]	0.506535	1.42063	5.86122e-05	0.414906	1.33321	0.000255784	0.54046	1.45444	0.00109862	0.564177	1.47854	0.00111464	0.690273	1.61359	0.000124138	0.718392	1.64535	8.20784e-05
218519_at	SLC35A5		Probable UDP-sugar transporter protein SLC35A5 (Solute carrier family 35 member A5) [Source:UniProtKB/Swiss-Prot;Acc:Q9BS91]	0.584582	1.4996	0.000191722	0.580301	1.49516	0.00101586	0.996834	1.99562	2.30105e-07	0.946736	1.92751	1.73085e-06	0.987459	1.98269	1.37037e-05	0.916677	1.88776	6.14791e-05
218526_s_at	RANGRF	OLF-1	Ran guanine nucleotide release factor (RanGNRF)(Ran-binding protein MOG1) [Source:UniProtKB/Swiss-Prot;Acc:Q9HD47]	-1.09174	-2.1313	1.35335e-08	-0.922863	-1.89587	6.722e-05	-0.772188	-1.70786	2.61649e-07	-0.81167	-1.75524	2.64414e-07	-0.989533	-1.98554	3.21028e-09	-0.992138	-1.98913	5.17203e-09
218611_at	IER5		Immediate early response gene 5 protein [Source:UniProtKB/Swiss-Prot;Acc:Q5VY09]	-1.43731	-2.70816	0.00190233	-1.3111	-2.48131	0.0193102	-0.409285	-1.32803	0.0250797	-0.534335	-1.44827	0.00112452	-0.503529	-1.41768	0.0149901	-0.569222	-1.48372	0.0025467
218643_s_at	CRIPT		Cysteine-rich PDZ-binding protein (Cysteine-rich interactor of PDZ three)(Cysteine-rich interactor of PDZ3) [Source:UniProtKB/Swiss-Prot;Acc:Q9P021]	0.788072	1.72676	6.21905e-05	0.792769	1.7324	0.00251012	1.02678	2.03747	1.76391e-07	1.16883	2.24829	2.98964e-09	1.23795	2.35863	1.22327e-07	1.31929	2.49544	1.86331e-08
218647_s_at	YRDC	RAR_RXR	YrdC domain-containing protein, mitochondrial Precursor (Ischemia/reperfusion-inducible protein homolog)(hIRIP)(Dopamine receptor-interacting protein 3) [Source:UniProtKB/Swiss-Prot;Acc:Q86U90]	-0.658534	-1.57848	0.0165718	-0.467532	-1.38274	0.0373251	-0.681729	-1.60406	0.000726491	-0.843638	-1.79457	9.85091e-06	-0.79531	-1.73545	0.000749083	-0.884967	-1.84672	5.35643e-05
218653_at	SLC25A15		Mitochondrial ornithine transporter 1 (Solute carrier family 25 member 15) [Source:UniProtKB/Swiss-Prot;Acc:Q9Y619]	-1.21746	-2.32537	1.09842e-07	-1.30555	-2.47178	4.59363e-07	-1.42258	-2.68064	1.40327e-06	-1.60091	-3.03335	1.42956e-08	-1.85959	-3.62904	4.17584e-09	-1.94429	-3.84848	4.39456e-11
218659_at	ASXL2	STAF	Putative Polycomb group protein ASXL2 (Additional sex combs-like protein 2) [Source:UniProtKB/Swiss-Prot;Acc:Q76L83]	0.930086	1.90539	3.81327e-06	0.765492	1.69995	0.000352104	0.454841	1.37063	0.000206146	0.524208	1.43814	1.23192e-05	0.583176	1.49814	0.000550766	0.632231	1.54996	0.000126463
218681_s_at	SDF2L1		Stromal cell-derived factor 2-like protein 1 Precursor (SDF2-like protein 1)(PWP1-interacting protein 8) [Source:UniProtKB/Swiss-Prot;Acc:Q9HCN8]	-0.517121	-1.4311	0.000732966	-0.591817	-1.50714	0.0111168	-1.04045	-2.05687	9.1825e-06	-1.21728	-2.32508	8.06987e-08	-1.48034	-2.79015	6.90971e-09	-1.57711	-2.98371	3.01298e-11
218708_at	NXT1		NTF2-related export protein 1 (Protein p15) [Source:UniProtKB/Swiss-Prot;Acc:Q9UKK6]	-0.653682	-1.57318	0.00109457	-0.448397	-1.36452	0.0402142	-1.01527	-2.02128	2.12737e-09	-1.12314	-2.17821	2.68734e-11	-0.542255	-1.45625	0.0447438	-0.571021	-1.48558	0.0387356
218769_s_at	ANKRA2	RAR_RXR	Ankyrin repeat family A protein 2 (RFXANK-like 2) [Source:UniProtKB/Swiss-Prot;Acc:Q9H9E1]	1.04275	2.06015	6.42815e-05	1.3265	2.50793	7.87829e-05	0.880994	1.84164	0.000268334	1.02509	2.03508	1.72153e-05	0.784457	1.72244	0.00792658	0.829733	1.77736	0.00476403
218806_s_at	VAV3		Guanine nucleotide exchange factor VAV3 (VAV-3) [Source:UniProtKB/Swiss-Prot;Acc:Q9UKW4]	0.603726	1.51964	0.0180288	0.535671	1.44962	0.046011	1.36367	2.57338	0.000306922	1.64005	3.11676	2.22321e-06	1.98683	3.96365	2.91212e-06	2.15049	4.43978	1.32823e-08
218807_at	VAV3		Guanine nucleotide exchange factor VAV3 (VAV-3) [Source:UniProtKB/Swiss-Prot;Acc:Q9UKW4]	0.82421	1.77057	1.37592e-05	0.701435	1.62612	7.98832e-05	0.955307	1.93899	0.000515238	1.18071	2.26689	1.42201e-06	1.43982	2.71286	1.20867e-06	1.58158	2.99298	1.93358e-09
218846_at	MED23	RAR_RXR	Mediator of RNA polymerase II transcription subunit 23 (Mediator complex subunit 23)(Cofactor required for Sp1 transcriptional activation subunit 3)(CRSP complex subunit 3)(Transcriptional coactivator CRSP130)(Vitamin D3 receptor-interacting protein complex 130 kDa component)(DRIP130)(Activator-recruited cofactor 130 kDa component)(ARC130)(hSur-2) [Source:UniProtKB/Swiss-Prot;Acc:Q9ULK4]	0.621151	1.5381	5.5803e-05	0.615302	1.53188	0.00425556	0.52867	1.4426	0.000153537	0.664835	1.58539	1.00923e-08	0.585266	1.50032	0.000870445	0.657393	1.57723	1.95529e-05
218849_s_at	PPP1R13L		RelA-associated inhibitor (Inhibitor of ASPP protein)(Protein iASPP)(PPP1R13B-like protein)(NFkB-interacting protein 1) [Source:UniProtKB/Swiss-Prot;Acc:Q8WUF5]	0.997324	1.99629	0.00686377	0.775914	1.71227	0.0106748	0.513486	1.42749	0.000781862	0.585265	1.50031	0.000145812	0.969113	1.95764	4.19227e-10	1.02187	2.03055	2.30508e-12
218858_at	DEPDC6		DEP domain-containing mTOR-interacting protein (Deptor)(DEP domain-containing protein 6) [Source:UniProtKB/Swiss-Prot;Acc:Q8TB45]	1.15619	2.22869	0.00661741	1.74617	3.35467	7.99541e-05	0.548665	1.46273	0.0305705	0.676493	1.59825	0.00498527	0.592499	1.50786	0.0380211	0.650867	1.57011	0.020442
218866_s_at	POLR3K		DNA-directed RNA polymerase III subunit RPC10 (RNA polymerase III subunit C10)(DNA-directed RNA polymerase III subunit K)(RNA polymerase III subunit C11)(RPC11)(HsC11p)(hRPC11)(DNA-directed RNA polymerases III 12.5 kDa polypeptide) [Source:UniProtKB/Swiss-Prot;Acc:Q9Y2Y1]	-0.742613	-1.6732	7.41303e-07	-0.697538	-1.62173	0.00116072	-0.971141	-1.96039	5.3599e-09	-1.09605	-2.13769	4.91284e-12	-0.925057	-1.89876	1.04627e-05	-0.983443	-1.97718	2.79643e-06
218886_at	PAK1IP1		p21-activated protein kinase-interacting protein 1 (PAK1-interacting protein 1)(PAK/PLC-interacting protein 1)(hPIP1)(WD repeat-containing protein 84) [Source:UniProtKB/Swiss-Prot;Acc:Q9NWT1]	-1.91894	-3.78146	1.16654e-12	-1.87059	-3.65681	1.24753e-06	-1.05597	-2.07912	2.23097e-08	-1.20385	-2.30353	4.6651e-12	-1.04264	-2.05999	3.1876e-05	-1.13704	-2.1993	5.87917e-06
218888_s_at	NETO2		Neuropilin and tolloid-like protein 2 Precursor (Brain-specific transmembrane protein containing 2 CUB and 1 LDL-receptor class A domains protein 2) [Source:UniProtKB/Swiss-Prot;Acc:Q8NC67]	-2.65517	-6.29921	4.42624e-12	-2.58578	-6.00342	2.09743e-06	-1.49121	-2.81125	0.000276719	-1.81761	-3.52496	4.80327e-07	-1.47407	-2.77804	0.00248478	-1.65823	-3.15629	0.000150838
218889_at	NOC3L		Nucleolar complex protein 3 homolog (NOC3 protein homolog)(NOC3-like protein)(Nucleolar complex-associated protein 3-like protein)(Factor for adipocyte differentiation 24) [Source:UniProtKB/Swiss-Prot;Acc:Q8WTT2]	-0.939122	-1.91736	1.22381e-05	-1.07889	-2.11241	6.69436e-05	-0.553204	-1.46734	0.000119514	-0.67148	-1.59271	6.84064e-07	-0.548913	-1.46298	0.00121639	-0.59949	-1.51518	0.000185506
218894_s_at	MAGOHB		Protein mago nashi homolog 2 [Source:UniProtKB/Swiss-Prot;Acc:Q96A72]	-1.01998	-2.02789	0.00159857	-1.11686	-2.16875	2.78323e-05	-0.400671	-1.32012	0.0255574	-0.55533	-1.4695	5.32625e-06	-0.466707	-1.38195	0.0164388	-0.561771	-1.47608	9.16088e-05
218900_at	CNNM4	PAX9, RAR_RXR	Metal transporter CNNM4 (Cyclin-M4)(Ancient conserved domain-containing protein 4) [Source:UniProtKB/Swiss-Prot;Acc:Q6P4Q7]	0.668786	1.58973	2.09314e-09	0.569018	1.48351	0.000100358	0.461318	1.3768	0.00101682	0.56281	1.47714	3.75797e-05	0.832504	1.78077	2.93516e-09	0.907098	1.87527	4.40483e-12
218949_s_at	QRSL1		Glutamyl-tRNA(Gln) amidotransferase subunit A homolog (EC 6.3.5.-)(Glutaminyl-tRNA synthase-like protein 1) [Source:UniProtKB/Swiss-Prot;Acc:Q9H0R6]	-0.57125	-1.48581	0.000982269	-0.571516	-1.48608	0.00483608	-0.529559	-1.44349	3.53188e-07	-0.568676	-1.48316	1.29684e-07	-0.548841	-1.46291	5.47934e-05	-0.576547	-1.49128	4.56233e-05
218976_at	DNAJC12		DnaJ homolog subfamily C member 12 (J domain-containing protein 1) [Source:UniProtKB/Swiss-Prot;Acc:Q9UKB3]	1.55358	2.93545	1.67576e-06	1.11055	2.15928	0.000270518	0.827195	1.77423	1.32036e-05	0.973492	1.96359	2.61685e-08	1.06755	2.09588	1.30841e-07	1.13967	2.20331	1.03097e-09
218984_at	PUS7		Pseudouridylate synthase 7 homolog (EC 5.4.99.-) [Source:UniProtKB/Swiss-Prot;Acc:Q96PZ0]	-1.0693	-2.09841	1.2879e-08	-1.08585	-2.12263	8.71216e-06	-0.657943	-1.57783	2.32129e-07	-0.732798	-1.66186	8.1405e-09	-0.797475	-1.73806	7.19142e-08	-0.82898	-1.77643	1.56243e-08
218996_at	TFPT	STAF	TCF3 fusion partner (Protein FB1)(INO80 complex subunit F) [Source:UniProtKB/Swiss-Prot;Acc:P0C1Z6]	-0.815851	-1.76034	0.000776628	-0.848338	-1.80043	4.64465e-06	-0.533995	-1.44793	2.86519e-06	-0.523902	-1.43784	8.6284e-06	-0.549723	-1.4638	0.000127231	-0.53583	-1.44978	0.000227937
219054_at	C5orf23		Uncharacterized protein C5orf23 [Source:UniProtKB/Swiss-Prot;Acc:Q9H7Z1]	-2.16444	-4.48294	4.55873e-10	-1.9317	-3.81503	7.72194e-06	-1.22916	-2.3443	0.00740325	-1.72068	-3.29591	4.21513e-09	-1.81479	-3.51809	0.000431359	-2.13531	-4.39333	2.65055e-09
219061_s_at	LAGE3		L antigen family member 3 (Protein ITBA2)(Protein ESO-3) [Source:UniProtKB/Swiss-Prot;Acc:Q14657]	-1.74872	-3.3606	5.08e-06	-1.67795	-3.19973	6.84654e-05	-0.430798	-1.34798	0.00207843	-0.478959	-1.39374	0.000850566	-0.448235	-1.36437	0.00441711	-0.462749	-1.37817	0.00378437
219071_x_at	C8orf30A		Brain protein 16 [Source:UniProtKB/Swiss-Prot;Acc:Q9BTY7]	-0.74669	-1.67794	0.000142046	-0.848886	-1.80111	0.00283667	-0.543303	-1.45731	5.11272e-05	-0.525732	-1.43966	8.06896e-05	-0.428548	-1.34588	0.0279356	-0.403327	-1.32255	0.0398778
219099_at	C12orf5	PAX9	Probable fructose-2,6-bisphosphatase TIGAR (EC 3.1.3.46)(TP53-induced glycolysis and apoptosis regulator) [Source:UniProtKB/Swiss-Prot;Acc:Q9NQ88]	-2.19863	-4.59044	7.10851e-05	-2.02094	-4.05849	4.13659e-06	-1.56912	-2.96723	2.45971e-06	-1.72622	-3.3086	5.64841e-07	-1.81024	-3.50701	1.53698e-06	-1.85152	-3.6088	1.34206e-06
219122_s_at	THG1L		Probable tRNA(His) guanylyltransferase (EC 2.7.7.-)(tRNA-histidine guanylyltransferase)(Interphase cytoplasmic foci protein 45) [Source:UniProtKB/Swiss-Prot;Acc:Q9NWX6]	0.64277	1.56132	1.78638e-05	0.510867	1.42491	0.00136147	0.817817	1.76274	5.33118e-05	0.772162	1.70783	0.000265811	0.955548	1.93932	2.5389e-05	0.949608	1.93135	6.37684e-05
219158_s_at	NARG1	PAX3	NMDA receptor-regulated protein 1 (N-terminal acetyltransferase)(Protein tubedown-1)(Tbdn100)(Gastric cancer antigen Ga19) [Source:UniProtKB/Swiss-Prot;Acc:Q9BXJ9]	-1.31124	-2.48155	2.98995e-08	-1.19133	-2.28363	2.84549e-05	-0.930169	-1.9055	2.40751e-05	-1.08643	-2.12347	1.33896e-07	-0.873768	-1.83244	0.00173016	-0.941021	-1.91989	0.000455779
219164_s_at	ATG2B	PAX3	Autophagy-related protein 2 homolog B [Source:UniProtKB/Swiss-Prot;Acc:Q96BY7]	1.69588	3.23974	1.23548e-07	1.59885	3.02902	0.000430001	0.963524	1.95007	1.12711e-05	1.11135	2.16048	8.19839e-07	1.38978	2.62038	3.18336e-09	1.50942	2.84695	1.30592e-10
219193_at	WDR70		WD repeat-containing protein 70 [Source:UniProtKB/Swiss-Prot;Acc:Q9NW82]	0.87391	1.83262	3.91008e-07	0.900968	1.86732	7.51005e-05	0.469859	1.38497	0.00360205	0.535854	1.4498	0.000470018	0.82585	1.77258	4.05084e-08	0.856424	1.81054	1.09668e-09
219211_at	TOP3B		DNA topoisomerase 3-beta-1 (EC 5.99.1.2)(DNA topoisomerase III beta-1) [Source:UniProtKB/Swiss-Prot;Acc:O95985]	-1.33225	-2.51795	1.31145e-07	-1.07374	-2.10489	2.64979e-05	-0.661315	-1.58152	1.64127e-05	-0.824142	-1.77048	4.62779e-09	-0.761539	-1.6953	4.81719e-05	-0.877054	-1.83662	1.60262e-07
219238_at	PIGV	AhR/Arnt, PAX9	GPI mannosyltransferase 2 (EC 2.4.1.-)(GPI mannosyltransferase II)(GPI-MT-II)(Phosphatidylinositol-glycan biosynthesis class V protein)(PIG-V) [Source:UniProtKB/Swiss-Prot;Acc:Q9NUD9]	0.93623	1.91352	7.448e-07	1.20796	2.3101	0.000101726	0.459264	1.37484	0.000420527	0.510878	1.42492	7.83657e-05	0.750205	1.68203	2.29341e-09	0.776229	1.71265	3.15327e-11
219258_at	TIPIN	OLF-1	TIMELESS-interacting protein [Source:UniProtKB/Swiss-Prot;Acc:Q9BVW5]	-0.711817	-1.63787	5.61354e-05	-0.883179	-1.84443	1.28753e-05	-0.924119	-1.89753	0.00172647	-1.18559	-2.27457	1.97246e-06	-0.735907	-1.66544	0.0424046	-0.841762	-1.79224	0.00757381
219269_at	HMBOX1	AhR/Arnt, OLF-1, PAX3, STAF	Homeobox-containing protein 1 [Source:UniProtKB/Swiss-Prot;Acc:Q6NT76]	1.29209	2.44883	0.00132706	1.32297	2.50181	0.0246816	0.524826	1.43876	0.000664543	0.595353	1.51084	3.80432e-05	0.529308	1.44324	0.00583823	0.541468	1.45545	0.00172326
219313_at	GRAMD1C		GRAM domain-containing protein 1C [Source:UniProtKB/Swiss-Prot;Acc:Q8IYS0]	0.875558	1.83472	2.05287e-10	0.770137	1.70543	1.18497e-05	1.07532	2.10718	0.00139982	1.23865	2.35978	0.00037408	2.10556	4.30365	1.07942e-13	2.22345	4.67008	1.13561e-17
219324_at	NOL12		Nucleolar protein 12 [Source:UniProtKB/Swiss-Prot;Acc:Q9UGY1]	-0.703143	-1.62805	0.00113573	-0.766236	-1.70083	0.00894135	-0.661891	-1.58216	0.000828765	-0.85083	-1.80354	4.54037e-07	-0.816133	-1.76068	0.000816577	-0.88208	-1.84303	1.94019e-05
219344_at	SLC29A3		Equilibrative nucleoside transporter 3 (hENT3)(Solute carrier family 29 member 3) [Source:UniProtKB/Swiss-Prot;Acc:Q9BZD2]	2.20467	4.60968	1.50475e-15	1.85122	3.60805	2.39188e-08	1.31438	2.48696	2.78227e-06	1.51536	2.8587	1.58202e-08	1.57352	2.9763	3.01339e-05	1.67329	3.18942	6.0765e-06
219421_at	TTC33	STAF	Tetratricopeptide repeat protein 33 (TPR repeat protein 33)(Osmosis-responsive factor) [Source:UniProtKB/Swiss-Prot;Acc:Q6PID6]	0.806294	1.74871	0.00582011	0.618477	1.53525	0.0346191	0.532919	1.44685	0.0319785	0.677541	1.59941	0.00304826	1.16915	2.2488	1.07658e-07	1.28584	2.43824	1.67792e-10
219575_s_at	COG8		Conserved oligomeric Golgi complex subunit 8 (COG complex subunit 8)(Component of oligomeric Golgi complex 8) [Source:UniProtKB/Swiss-Prot;Acc:Q96MW5]	-0.786192	-1.72452	7.5969e-08	-0.865803	-1.82235	3.95252e-06	-0.585401	-1.50046	8.02412e-08	-0.640037	-1.55837	1.37489e-08	-0.475276	-1.39018	0.00154738	-0.492958	-1.40733	0.00140902
219583_s_at	SPATA7	RAR_RXR	Spermatogenesis-associated protein 7 (Spermatogenesis-associated protein HSD3)(HSD-3.1) [Source:UniProtKB/Swiss-Prot;Acc:Q9P0W8]	0.833791	1.78236	1.44948e-05	0.719392	1.64649	0.00816161	1.06675	2.0947	1.35768e-11	1.12769	2.18509	9.3921e-11	0.733668	1.66286	0.0112873	0.720548	1.64781	0.0291696
219789_at	NPR3		Atrial natriuretic peptide clearance receptor Precursor (Atrial natriuretic peptide C-type receptor)(ANPRC)(ANP-C)(NPR-C) [Source:UniProtKB/Swiss-Prot;Acc:P17342]	-2.14584	-4.42549	2.20719e-09	-1.86188	-3.63481	2.57846e-06	-0.756467	-1.68935	0.00254401	-0.813564	-1.75755	0.00145288	-1.16413	-2.24097	6.73321e-06	-1.20076	-2.29861	6.14016e-06
219956_at	GALNT6		Polypeptide N-acetylgalactosaminyltransferase 6 (EC 2.4.1.41)(Polypeptide GalNAc transferase 6)(pp-GaNTase 6)(GalNAc-T6)(Protein-UDP acetylgalactosaminyltransferase 6)(UDP-GalNAc:polypeptide N-acetylgalactosaminyltransferase 6) [Source:UniProtKB/Swiss-Prot;Acc:Q8NCL4]	-1.03846	-2.05404	0.000550412	-1.48434	-2.7979	0.000113583	-0.413341	-1.33177	0.000402889	-0.508585	-1.42265	7.94153e-07	-0.569188	-1.48369	3.1934e-05	-0.628995	-1.54649	3.23944e-07
220011_at	C1orf135		Uncharacterized protein C1orf135 [Source:UniProtKB/Swiss-Prot;Acc:Q9H7T9]	-1.06228	-2.08823	1.12407e-07	-0.927799	-1.90237	0.000120652	-1.15474	-2.22644	3.83146e-07	-1.31229	-2.48335	6.78548e-12	-0.839478	-1.7894	0.00807199	-0.949017	-1.93056	0.00131194
220319_s_at	MYLIP		E3 ubiquitin-protein ligase MYLIP (EC 6.3.2.-)(Myosin regulatory light chain-interacting protein)(MIR) [Source:UniProtKB/Swiss-Prot;Acc:Q8WY64]	1.00385	2.00534	3.4611e-10	1.12111	2.17514	1.61209e-07	0.813029	1.7569	1.8473e-05	0.949516	1.93122	1.35477e-07	0.570243	1.48477	0.0295533	0.61297	1.5294	0.0220578
220363_s_at	ELMO2	PAX9	Engulfment and cell motility protein 2 (CED-12 homolog A)(hCED-12A) [Source:UniProtKB/Swiss-Prot;Acc:Q96JJ3]	-0.445462	-1.36175	0.0180846	-0.549906	-1.46399	0.0140991	-0.540768	-1.45475	0.00724526	-0.479097	-1.39387	0.0134871	-0.707262	-1.6327	0.00729799	-0.644558	-1.56326	0.0129608
220688_s_at	MRTO4		mRNA turnover protein 4 homolog [Source:UniProtKB/Swiss-Prot;Acc:Q9UKD2]	-0.593197	-1.50859	0.00342671	-0.542062	-1.45605	0.0216074	-0.53266	-1.44659	0.00842528	-0.739632	-1.66975	1.01563e-05	-0.861624	-1.81708	5.91631e-05	-0.991674	-1.98849	1.45688e-08
220865_s_at	PDSS1		Decaprenyl-diphosphate synthase subunit 1 (EC 2.5.1.-)(Decaprenyl pyrophosphate synthetase subunit 1)(Trans-prenyltransferase)(TPT) [Source:UniProtKB/Swiss-Prot;Acc:Q5T2R2]	-1.78409	-3.44402	9.04896e-08	-1.92824	-3.80592	6.58387e-05	-1.01724	-2.02404	0.00374398	-1.35136	-2.55153	1.7346e-06	-1.72924	-3.31554	1.94971e-07	-1.92769	-3.80445	8.7857e-15
220933_s_at	ZCCHC6		Zinc finger CCHC domain-containing protein 6 [Source:UniProtKB/Swiss-Prot;Acc:Q5VYS8]	0.551194	1.4653	0.00300598	0.558726	1.47297	0.00573542	0.491041	1.40546	0.0397267	0.658318	1.57824	0.00119223	1.01609	2.02243	3.36444e-06	1.12623	2.18288	8.16041e-10
220949_s_at	C7orf49		Modulator of retrovirus infection homolog [Source:UniProtKB/Swiss-Prot;Acc:Q9BWK5]	-0.468477	-1.38365	0.0131598	-0.573147	-1.48777	0.00407047	-0.649158	-1.56825	1.24015e-06	-0.700381	-1.62493	2.38583e-07	-0.438518	-1.35521	0.0281144	-0.465146	-1.38046	0.0242977
221012_s_at	TRIM8		Tripartite motif-containing protein 8 (RING finger protein 27)(Glioblastoma-expressed RING finger protein) [Source:UniProtKB/Swiss-Prot;Acc:Q9BZR9]	0.65684	1.57663	6.65091e-07	0.725746	1.65376	1.16066e-05	0.418596	1.33663	0.00323098	0.543677	1.45768	1.75433e-05	0.616103	1.53273	9.53823e-06	0.678606	1.60059	1.04338e-07
221014_s_at	RAB33B		Ras-related protein Rab-33B [Source:UniProtKB/Swiss-Prot;Acc:Q9H082]	0.645557	1.56434	8.95037e-07	0.713933	1.64027	1.24753e-06	0.447248	1.36344	0.000695528	0.552777	1.46691	3.42403e-05	0.426482	1.34395	0.0132647	0.480034	1.39478	0.00581179
221024_s_at	SLC2A10		Solute carrier family 2, facilitated glucose transporter member 10 (Glucose transporter type 10)(GLUT-10) [Source:UniProtKB/Swiss-Prot;Acc:O95528]	0.82109	1.76674	0.000604127	1.04286	2.0603	0.00238521	1.28725	2.44063	0.00719985	1.36395	2.57389	0.0092345	1.27056	2.41256	0.0279925	1.26103	2.39667	0.0406433
221090_s_at	OGFOD1		2-oxoglutarate and iron-dependent oxygenase domain-containing protein 1 (EC 1.14.11.-)(Termination and polyadenylation 1 homolog) [Source:UniProtKB/Swiss-Prot;Acc:Q8N543]	-0.85254	-1.80568	2.92943e-07	-0.745528	-1.67659	0.00048717	-0.665274	-1.58587	1.91156e-05	-0.783236	-1.72099	1.41843e-07	-0.910539	-1.87975	5.44647e-07	-0.954871	-1.93841	3.95787e-08
221220_s_at	SCYL2		SCY1-like protein 2 (Coated vesicle-associated kinase of 104 kDa) [Source:UniProtKB/Swiss-Prot;Acc:Q6P3W7]	-0.460238	-1.37577	0.000604677	-0.462011	-1.37746	0.0013465	-0.501483	-1.41567	0.00268746	-0.528988	-1.44292	0.00260718	-0.516921	-1.4309	0.0165083	-0.51094	-1.42498	0.0179207
221472_at	SERINC3		Serine incorporator 3 (Tumor differentially expressed protein 1) [Source:UniProtKB/Swiss-Prot;Acc:Q13530]	0.664004	1.58447	0.000514055	0.734089	1.66335	0.0120779	0.437061	1.35384	1.82322e-06	0.491166	1.40558	2.20678e-07	0.530085	1.44401	9.997e-08	0.55543	1.46961	2.61877e-08
221479_s_at	BNIP3L		BCL2/adenovirus E1B 19 kDa protein-interacting protein 3-like (NIP3-like protein X)(NIP3L)(BCL2/adenovirus E1B 19 kDa protein-interacting protein 3A)(Adenovirus E1B19K-binding protein B5) [Source:UniProtKB/Swiss-Prot;Acc:O60238]	0.697154	1.6213	0.00443134	0.802667	1.74432	0.0060808	0.484041	1.39866	0.00446277	0.534157	1.4481	0.00238855	0.645789	1.5646	0.000479511	0.645922	1.56474	0.000576155
221502_at	KPNA3		Importin subunit alpha-3 (Karyopherin subunit alpha-3)(SRP1-gamma)(Importin alpha Q2)(Qip2) [Source:UniProtKB/Swiss-Prot;Acc:O00505]	-0.674256	-1.59577	7.49309e-13	-0.716905	-1.64365	2.86657e-07	-0.944032	-1.9239	1.69556e-07	-1.06346	-2.08993	7.80383e-09	-0.724981	-1.65288	0.00342647	-0.770344	-1.70568	0.00238732
221503_s_at	KPNA3		Importin subunit alpha-3 (Karyopherin subunit alpha-3)(SRP1-gamma)(Importin alpha Q2)(Qip2) [Source:UniProtKB/Swiss-Prot;Acc:O00505]	-0.551201	-1.46531	0.000477389	-0.561644	-1.47595	0.0011844	-1.12575	-2.18215	6.29972e-07	-1.24739	-2.37412	1.41026e-08	-0.856097	-1.81013	0.00619299	-0.89897	-1.86473	0.00351041
221582_at	Unknown		Unknown	1.80349	3.49063	8.65331e-12	1.84332	3.58835	1.2351e-07	0.575728	1.49043	2.96502e-05	0.666208	1.5869	6.84645e-07	0.528781	1.44271	0.00110527	0.566879	1.48132	0.000328005
221589_s_at	Unknown		Unknown	0.561628	1.47593	0.00860756	0.604321	1.52026	0.0137378	0.474198	1.38915	0.00349953	0.627373	1.54475	8.53227e-06	0.681422	1.60372	8.1715e-05	0.768403	1.70338	5.25159e-07
221595_at	C7orf64		UPF0712 protein C7orf64 [Source:UniProtKB/Swiss-Prot;Acc:Q5RL73]	1.56034	2.94922	2.63383e-10	1.33623	2.5249	1.50437e-06	0.962411	1.94856	3.53188e-07	1.03205	2.04493	5.2055e-07	0.646219	1.56506	0.0287409	0.656188	1.57591	0.0373776
221599_at	C11orf67	OLF-1	UPF0366 protein C11orf67 [Source:UniProtKB/Swiss-Prot;Acc:Q9H7C9]	0.734117	1.66338	0.00474713	0.715047	1.64154	0.0443867	0.528055	1.44198	0.00622447	0.677358	1.59921	6.52942e-05	0.950415	1.93243	1.16734e-07	1.05691	2.08047	2.95802e-12
221637_s_at	C11orf48		Uncharacterized protein C11orf48 [Source:UniProtKB/Swiss-Prot;Acc:Q9BQE6]	-0.544403	-1.45842	2.11888e-05	-0.668262	-1.58916	7.75699e-05	-0.604892	-1.52087	5.86632e-09	-0.62562	-1.54287	2.36991e-08	-0.520667	-1.43462	0.000136782	-0.512036	-1.42606	0.000275656
221712_s_at	WDR74		WD repeat-containing protein 74 (NOP seven-associated protein 1) [Source:UniProtKB/Swiss-Prot;Acc:Q6RFH5]	-0.733412	-1.66257	0.000139464	-0.775762	-1.71209	0.00479804	-0.61292	-1.52935	4.54961e-05	-0.730964	-1.65975	1.63735e-07	-0.583086	-1.49805	0.00189735	-0.652781	-1.5722	0.000228612
221718_s_at	AKAP13		A-kinase anchor protein 13 (AKAP 13)(Protein kinase A-anchoring protein 13)(Breast cancer nuclear receptor-binding auxiliary protein)(Human thyroid-anchoring protein 31)(Guanine nucleotide exchange factor Lbc)(AKAP-Lbc)(P47)(Lymphoid blast crisis oncogene)(LBC oncogene)(Non-oncogenic Rho GTPase-specific GTP exchange factor) [Source:UniProtKB/Swiss-Prot;Acc:Q12802]	0.795344	1.73549	4.54427e-08	0.668736	1.58968	1.13997e-06	0.448645	1.36476	7.26541e-06	0.512143	1.42617	7.07149e-08	0.513816	1.42782	0.00044304	0.556054	1.47024	8.71778e-05
221729_at	COL5A2		Collagen alpha-2(V) chain Precursor [Source:UniProtKB/Swiss-Prot;Acc:P05997]	0.625718	1.54298	0.0471008	0.888502	1.85125	0.0474893	0.710149	1.63597	0.000314884	0.706348	1.63167	0.000605012	1.18286	2.27027	4.17584e-09	1.17076	2.2513	6.10145e-09
221735_at	WDR48	PAX3	WD repeat-containing protein 48 (WD repeat endosomal protein)(USP1-associated factor 1)(p80) [Source:UniProtKB/Swiss-Prot;Acc:Q8TAF3]	0.621994	1.539	0.00271894	0.70178	1.62651	0.0146904	0.440343	1.35693	0.000860626	0.523123	1.43706	1.58178e-05	0.64293	1.5615	1.58977e-06	0.686011	1.60883	1.12902e-08
221737_at	GNA12		Guanine nucleotide-binding protein subunit alpha-12 (G-protein subunit alpha-12)(G alpha-12) [Source:UniProtKB/Swiss-Prot;Acc:Q03113]	-0.912316	-1.88206	3.36712e-07	-0.971121	-1.96036	0.000103972	-0.764198	-1.69843	1.56323e-06	-0.859441	-1.81433	1.99365e-07	-0.945266	-1.92554	3.36938e-07	-1.00793	-2.01103	7.23702e-08
221756_at	PIK3IP1	OLF-1	Phosphoinositide-3-kinase-interacting protein 1 Precursor (Kringle domain-containing protein HGFL) [Source:UniProtKB/Swiss-Prot;Acc:Q96FE7]	3.37235	10.3556	6.32495e-19	3.45584	10.9727	7.78356e-09	0.926576	1.90076	0.000279829	1.2096	2.31274	5.06492e-10	1.28245	2.43252	5.734e-06	1.41792	2.672	6.08702e-11
221757_at	PIK3IP1	OLF-1	Phosphoinositide-3-kinase-interacting protein 1 Precursor (Kringle domain-containing protein HGFL) [Source:UniProtKB/Swiss-Prot;Acc:Q96FE7]	2.22115	4.66266	4.00648e-13	2.30419	4.9389	2.88543e-07	0.581509	1.49641	0.00497286	0.70819	1.63375	8.46499e-05	0.884203	1.84575	2.40241e-05	0.974086	1.9644	3.42338e-07
221824_s_at	MA RCH-8		E3 ubiquitin-protein ligase MARCH8 (EC 6.3.2.-)(Membrane-associated RING finger protein 8)(Membrane-associated RING-CH protein VIII)(MARCH-VIII)(RING finger protein 178)(Cellular modulator of immune recognition)(c-MIR) [Source:UniProtKB/Swiss-Prot;Acc:Q5T0T0]	2.09722	4.27883	1.35885e-11	2.13581	4.39484	4.60188e-06	1.30254	2.46663	4.83521e-10	1.35587	2.55952	2.27344e-09	0.987643	1.98294	0.00548882	0.993107	1.99047	0.00566317
221841_s_at	KLF4	RAR_RXR	Krueppel-like factor 4 (Epithelial zinc finger protein EZF)(Gut-enriched krueppel-like factor) [Source:UniProtKB/Swiss-Prot;Acc:O43474]	0.502831	1.41699	0.000149456	0.602708	1.51856	0.000303089	0.6516	1.57091	0.00237037	0.768958	1.70404	0.000258447	0.613854	1.53034	0.0385166	0.645426	1.5642	0.0323384
221864_at	ORAI3	OLF-1, PAX3, PAX9, RAR_RXR, STAF	Protein orai-3 (Transmembrane protein 142C) [Source:UniProtKB/Swiss-Prot;Acc:Q9BRQ5]	0.457746	1.37339	0.0428491	0.704746	1.62986	0.0188228	0.467595	1.3828	0.0315035	0.642808	1.56137	6.7945e-05	0.642675	1.56122	0.00381545	0.741858	1.67233	1.6231e-05
221896_s_at	HIGD1A		HIG1 domain family member 1A (Hypoxia-inducible gene 1 protein) [Source:UniProtKB/Swiss-Prot;Acc:Q9Y241]	-0.908949	-1.87768	7.1071e-08	-0.869109	-1.82653	1.46246e-07	-0.492905	-1.40728	5.93612e-06	-0.542633	-1.45663	5.27677e-07	-0.689643	-1.61288	6.89378e-11	-0.710053	-1.63586	3.55226e-12
221897_at	TRIM52		Tripartite motif-containing protein 52 (RING finger protein 102) [Source:UniProtKB/Swiss-Prot;Acc:Q96A61]	1.3773	2.59781	1.62657e-10	1.45957	2.75027	1.00649e-06	0.937823	1.91564	6.62232e-05	1.18683	2.27652	1.76034e-09	1.10642	2.15311	0.000230576	1.24542	2.37088	4.73169e-06
221899_at	N4BP2L2	STAF	NEDD4-binding protein 2-like 2 (Phosphonoformate immuno-associated protein 5) [Source:UniProtKB/Swiss-Prot;Acc:Q92802]	0.606165	1.52221	0.000117798	0.554628	1.46879	0.00387443	0.443634	1.36003	0.000126295	0.513956	1.42796	8.02562e-06	0.580934	1.49582	5.68726e-06	0.659261	1.57927	2.18005e-07
221899_at	RP11-298P3.1		phosphonoformate immuno-associated protein 5 isoform 1 [Source:RefSeq peptide;Acc:NP_149102]	0.759916	1.69339	0.0148821	0.870054	1.82773	0.0305968	0.641644	1.56011	0.00129792	0.834161	1.78282	5.11384e-07	0.617658	1.53438	0.00926287	0.708364	1.63395	0.000648092
221954_at	C20orf111		Uncharacterized protein C20orf111 [Source:UniProtKB/Swiss-Prot;Acc:Q9NX31]	1.34594	2.54196	1.91281e-06	1.31054	2.48034	0.000482519	0.799172	1.7401	2.25402e-07	0.879928	1.84028	2.1972e-08	0.80412	1.74608	1.95969e-05	0.842839	1.79358	8.58473e-06
221962_s_at	UBE2H	AhR/Arnt, OLF-1, STAF	Ubiquitin-conjugating enzyme E2 H (EC 6.3.2.19)(Ubiquitin-protein ligase H)(Ubiquitin carrier protein H)(UbcH2)(E2-20K) [Source:UniProtKB/Swiss-Prot;Acc:P62256]	1.05996	2.08487	2.41928e-09	1.14146	2.20605	1.6127e-07	0.565499	1.4799	0.000308817	0.646286	1.56513	2.99876e-05	0.417222	1.33535	0.0423221	0.442363	1.35883	0.0314776
221984_s_at	FAM134A	PAX9	Protein FAM134A [Source:UniProtKB/Swiss-Prot;Acc:Q8NC44]	0.861349	1.81674	5.28273e-09	0.904275	1.8716	8.3754e-06	0.529119	1.44305	0.000259472	0.632271	1.55	3.45087e-06	0.736221	1.66581	1.11411e-05	0.79655	1.73694	7.63255e-07
221985_at	KLHL24	STAF	Kelch-like protein 24 (Kainate receptor-interacting protein for GluR6)(KRIP6)(Protein DRE1) [Source:UniProtKB/Swiss-Prot;Acc:Q6TFL4]	2.51505	5.71618	4.39895e-07	2.67695	6.39503	0.000330649	1.685	3.21539	1.78201e-05	1.93116	3.81361	6.7575e-07	1.21705	2.3247	0.0211973	1.31953	2.49586	0.0121853
221986_s_at	KLHL24	STAF	Kelch-like protein 24 (Kainate receptor-interacting protein for GluR6)(KRIP6)(Protein DRE1) [Source:UniProtKB/Swiss-Prot;Acc:Q6TFL4]	2.37514	5.18786	9.12292e-06	2.50697	5.68423	0.00165893	1.8248	3.54258	6.05325e-07	2.04508	4.12697	8.38939e-09	1.2536	2.38435	0.0119373	1.31259	2.48387	0.00940092
222006_at	LETM1		LETM1 and EF-hand domain-containing protein 1, mitochondrial Precursor (Leucine zipper-EF-hand-containing transmembrane protein 1) [Source:UniProtKB/Swiss-Prot;Acc:O95202]	-0.524332	-1.43827	2.83632e-05	-0.536445	-1.45039	0.00369944	-0.558676	-1.47292	2.54293e-05	-0.595658	-1.51116	2.29425e-05	-0.661555	-1.58179	3.64487e-06	-0.673005	-1.59439	7.79791e-06
222052_at	C19orf54	STAF	UPF0692 protein C19orf54 [Source:UniProtKB/Swiss-Prot;Acc:Q5BKX5]	0.755446	1.68815	0.00582585	0.82772	1.77488	0.000166657	0.638825	1.55706	6.20765e-06	0.685979	1.60879	1.45792e-06	0.810634	1.75398	6.96895e-08	0.801615	1.74305	1.236e-07
222111_at	FAM63B		Protein FAM63B [Source:UniProtKB/Swiss-Prot;Acc:Q8NBR6]	0.616062	1.53269	0.000203581	0.679495	1.60158	0.00060319	1.17516	2.25818	3.64758e-07	1.24837	2.37572	8.75314e-08	1.1454	2.21207	0.000261918	1.15657	2.22927	0.000222652
222127_s_at	EXOC1		Exocyst complex component 1 (Exocyst complex component Sec3) [Source:UniProtKB/Swiss-Prot;Acc:Q9NV70]	0.933076	1.90934	0.0014046	0.891532	1.85514	0.0249694	0.465494	1.38079	1.53783e-05	0.533412	1.44735	3.4194e-07	0.615511	1.5321	1.60747e-07	0.639885	1.5582	1.92119e-08
222157_s_at	WDR48	PAX3	WD repeat-containing protein 48 (WD repeat endosomal protein)(USP1-associated factor 1)(p80) [Source:UniProtKB/Swiss-Prot;Acc:Q8TAF3]	0.541101	1.45508	0.00116923	0.646252	1.5651	0.00432805	0.434172	1.35114	0.000388783	0.52152	1.43547	6.33662e-06	0.612494	1.5289	2.14079e-06	0.672449	1.59378	4.45485e-08
222200_s_at	BSDC1		BSD domain-containing protein 1 [Source:UniProtKB/Swiss-Prot;Acc:Q9NW68]	0.874234	1.83304	1.14909e-07	0.842513	1.79317	0.000738254	0.562496	1.47682	2.46311e-07	0.621142	1.53809	3.30799e-08	0.579931	1.49478	2.61722e-05	0.612908	1.52934	1.76011e-05
222273_at	PAPOLG		Poly(A) polymerase gamma (PAP-gamma)(EC 2.7.7.19)(Polynucleotide adenylyltransferase gamma)(SRP RNA 3'-adenylating enzyme)(Neo-poly(A) polymerase)(Neo-PAP) [Source:UniProtKB/Swiss-Prot;Acc:Q9BWT3]	1.39196	2.62434	1.10386e-13	1.21855	2.32713	2.86777e-07	0.478317	1.39312	0.000936978	0.576729	1.49146	4.13925e-05	0.481876	1.39656	0.00827028	0.575652	1.49035	0.00137861
38892_at	KIAA0240		Uncharacterized protein KIAA0240 [Source:UniProtKB/Swiss-Prot;Acc:Q6AI39]	0.661915	1.58218	0.000655827	0.714101	1.64046	0.00120927	0.485078	1.39966	0.00468347	0.616523	1.53318	3.88236e-05	0.739987	1.67016	6.20594e-05	0.816675	1.76134	3.95516e-07
41644_at	SASH1		SAM and SH3 domain-containing protein 1 (Proline-glutamate repeat-containing protein) [Source:UniProtKB/Swiss-Prot;Acc:O94885]	0.787411	1.72597	2.15383e-07	0.757072	1.69006	0.00141562	0.626006	1.54329	3.16536e-05	0.696688	1.62078	5.42932e-06	0.813544	1.75752	2.92596e-07	0.844334	1.79544	8.49199e-08
48825_at	ING4		Inhibitor of growth protein 4 (p29ING4) [Source:UniProtKB/Swiss-Prot;Acc:Q9UNL4]	1.37195	2.5882	7.25592e-08	1.26426	2.40204	0.000233409	0.868519	1.82579	2.4807e-10	0.989779	1.98588	5.88266e-12	0.58069	1.49556	0.00956993	0.602093	1.51792	0.0104202
56256_at	SIDT2		SID1 transmembrane family member 2 Precursor [Source:UniProtKB/Swiss-Prot;Acc:Q8NBJ9]	0.872914	1.83136	0.0033033	0.983918	1.97783	0.00847377	0.478002	1.39281	0.000105667	0.550422	1.46451	1.03654e-05	0.65645	1.5762	2.26358e-07	0.694111	1.61789	2.9178e-08
56919_at	WDR48	PAX3	WD repeat-containing protein 48 (WD repeat endosomal protein)(USP1-associated factor 1)(p80) [Source:UniProtKB/Swiss-Prot;Acc:Q8TAF3]	0.536184	1.45013	0.00375878	0.634115	1.55199	0.00293354	0.525827	1.43976	4.9049e-06	0.595054	1.51053	3.63407e-07	0.650467	1.56968	2.07935e-06	0.682578	1.605	7.09763e-07
