# Supplementary material for: Gene expression changes as markers of early lapatinib response in a panel of breast cancer cell lines
Source: Mol Cancer. 2012 Jun 18;11:41. doi: 10.1186/1476-4598-11-41 (PMC3439312; doi:10.1186/1476-4598-11-41)
Supplement: Additional File 4 — Statistical Overrepresentation of the TFs identified by CIA. [file 1476-4598-11-41-S4.xls]

## Sheet: Sheet1
	Foreground Frequency	Background Frequency	P-value
PAX9	15/421	165/8252	0.04221
PAX3	42/421	595/8252	0.04954
OLF-1	38/421	666/8252	0.3806
Ahr/ARNT	26/421	249/8252	0.001693
RAR/RXR	41/421	1290/8252	1
ZNF143	41/421	421/8252	0.0003309
